# Supplementary material for: Palladium-catalyzed silyl C(sp3)–H bond activation
Source: Royal Society of Chemistry journal article supplement (doi:10.1039/c2ob06941e), 2012-01-01

### *Cover Page for Supporting Information*

***Manuscript Title:***

Palladium-catalyzed Silyl C(sp<sup>3</sup>)-H Bond Activation

***Authors:***

Yun Liang, Weizhi Geng, Junnian Wei, Kunbing Ouyang and Zhenfeng Xi\*

***Affiliations:***

*Beijing National Laboratory for Molecular Science, Key Laboratory of Bioorganic Chemistry and Molecular Engineering of Ministry of Education, College of Chemistry, Peking University, Beijing 100871, China; Key Laboratory of Resource Fine-Processing and Advanced Materials of Hunan Province and Key Laboratory of Chemical Biology and Traditional Chinese Medicine Research, Ministry of Education, Hunan Normal University, Changsha Hunan 410081, China; State Key Laboratory of Organometallic Chemistry, Shanghai Institute of Organic Chemistry, Chinese Academy of Sciences, Shanghai, 200032, China.*

***Contents:***

|                                                                                                                 |         |
|-----------------------------------------------------------------------------------------------------------------|---------|
| 1) General Information                                                                                          | S2      |
| 2) Synthesis and Characterization of Starting Materials <b>1</b> , <b>3</b> , <b>5</b> , <b>7</b> and <b>10</b> | S2–S10  |
| 3) Reaction Condition Optimization of the Pd-catalyzed Reaction of <b>1a</b>                                    | S10–S11 |
| 4) Typical Procedure for the Preparation and Characterization of <b>2</b> , <b>4</b> , <b>6</b> and <b>8</b>    | S11–S17 |
| 5) X-ray Crystallographic Studies of <b>6e</b> and <b>8a</b>                                                    | S17–S21 |
| 6) Scanned <sup>1</sup> H NMR and <sup>13</sup> C NMR Spectra of All New Compounds                              | S22–S68 |

## 1) General Information

Unless otherwise noted, all starting materials were commercially available and were used without further purification. Solvents were purified by M-Braun SPS-800 Solvent Purification System. *n*-BuLi and PhLi were obtained from Acros. All reactions were carried out under a dry and oxygen-free nitrogen atmosphere in slight positive pressure by using Schlenk techniques.

<sup>1</sup>H and <sup>13</sup>C NMR spectra were recorded on a JEOL JNM-AL300 spectrometer (FT, 300 MHz for <sup>1</sup>H; 75 MHz for <sup>13</sup>C), or a Bruker ARX400 spectrometer (FT, 400 MHz for <sup>1</sup>H; 100 MHz for <sup>13</sup>C) at room temperature, unless otherwise noted. High-resolution mass spectra (HRMS) were recorded on a Bruker Apex IV FTMS mass spectrometer using ESI (electrospray ionization). GC analyses were recorded on SHIMADZU GC-2010 spectrometer using FID.

## 2) Synthesis and Characterization of Starting Materials 1, 3, 5,7 and 10

### Preparation of 1a-g:

Compounds **1a-g** were prepared according the literature method.<sup>1</sup> To a solution of 4.72 g (20 mmol) of *o*-dibromobenzene in 50 mL of THF was added dropwise, under an atmosphere of nitrogen, 6.25 mL of a 1.6 M solution of *n*-BuLi (10 mmol) in *n*-hexane while the temperature was maintained at -78 °C. After addition, the mixture was warmed to 0 °C and subsequently hydrolyzed with 10 mL of 3 M HCl solution. The organic solvents were removed by rotary evaporation, and the residue was extracted with diethyl ether. The combined filtrates were concentrated under reduced pressure and the crude product was purified by using silicon gel column with petroleum ether as eluent to give the pure product of 2,2'-dibromobiphenyl 2.37 g (76%).

To a solution of 624 mg (2.0 mmol) of 2,2'-dibromobiphenyl in 10 mL of THF at -78 °C was added dropwise, under an atmosphere of argon, 1.3 mL of 1.6 M solution of *n*-BuLi (2.1 mmol) in hexane. After addition, the mixture was stirred for 15 min and 325 mg (3 mmol) of chlorotrialkylsilane was added dropwise. The mixture was warmed to room temperature, a saturated solution of NH<sub>4</sub>Cl in water added, and the mixture

extracted with diethyl ether. The organic fractions were combined, washed (brine), dried ( $\text{Na}_2\text{SO}_4$ ), concentrated under reduced pressure and the crude product was purified by using silica gel column with petroleum ether as eluent to give the pure product of (2'-bromobiphenyl-2-yl)trialkylsilane.

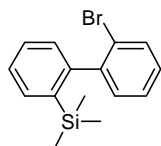 **1a**:<sup>1</sup> Colorless liquid, isolated yield 85% (518 mg); <sup>1</sup>H NMR (300 MHz,  $\text{CDCl}_3$ )  $\delta$ : 7.65-7.61 (m, 2H), 7.40-7.37 (m, 2H), 7.33 (d,  $J$  = 6.6 Hz, 1H), 7.30-7.13 (m, 3H), -0.01 (s, 9H); <sup>13</sup>C NMR (75 MHz,  $\text{CDCl}_3$ )  $\delta$ : 0.03, 124.32, 126.46, 126.84, 128.28, 128.92, 129.62, 131.56, 132.29, 134.51, 138.35, 144.21, 147.38.

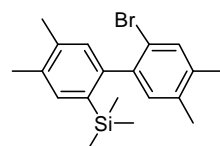 **1b**: Colorless solid, isolated yield 90% (650 mg); mp: 89.8-91.2 °C; <sup>1</sup>H NMR (300 MHz,  $\text{CDCl}_3$ )  $\delta$ : 7.39 (s, 1H), 7.37 (s, 1H), 7.00 (s, 1H), 6.94 (s, 1H), 2.33 (s, 3H), 2.29 (s, 3H), 2.28 (s, 3H), 2.22 (s, 3H), 0.00 (s, 9H); <sup>13</sup>C NMR (75 MHz,  $\text{CDCl}_3$ )  $\delta$ : 0.19, 19.09, 19.23, 19.62, 19.64, 120.79, 131.21, 132.82, 133.09, 134.77, 134.79, 135.31, 135.90, 136.79, 137.37, 141.48, 145.27; HRMS (ESI,  $m/z$ ) calcd for  $[\text{C}_{19}\text{H}_{25}\text{BrSi}]^+$ : 361.0982; found 361.0991.

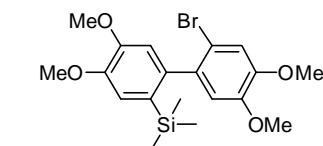 **1c**: Colorless solid, isolated yield 88% (748 mg); mp: 126.8-127.2 °C; <sup>1</sup>H NMR (300 MHz,  $\text{CDCl}_3$ )  $\delta$ : 7.06 (s, 1H), 7.04 (s, 1H), 6.76 (s, 1H), 6.66 (s, 1H), 3.91 (s, 3H), 3.90 (s, 3H), 3.83 (s, 3H), 3.82 (s, 3H), 0.01 (s, 9H); <sup>13</sup>C NMR (75 MHz,  $\text{CDCl}_3$ )  $\delta$ : 0.25, 55.70, 55.75, 55.89, 56.14, 113.73, 114.54, 114.67, 114.80, 116.53, 129.66, 136.12, 140.77, 147.28, 147.47, 148.70, 148.74; HRMS (ESI,  $m/z$ ) calcd for  $[\text{C}_{19}\text{H}_{25}\text{BrO}_4\text{Si}]^+$ : 425.0778; found 425.0790.

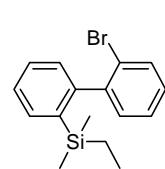 **1d**: Colorless liquid, isolated yield 87% (555 mg); <sup>1</sup>H NMR (400 MHz,  $\text{CDCl}_3$ )  $\delta$ : 7.64-7.60 (m, 2H), 7.40-7.37 (m, 2H), 7.32 (t,  $J$  = 6.8 Hz, 1H), 7.25-7.20 (m, 2H), 7.14 (d,  $J$  = 8.8 Hz, 1H), 0.88-0.83 (m, 3H), 0.54-0.50 (m, 2H), -0.03 (s, 3H), -0.11 (s, 3H); <sup>13</sup>C NMR (75 MHz,  $\text{CDCl}_3$ )  $\delta$ : -2.46, 7.54, 8.13, 124.34, 126.44, 126.74, 128.21, 128.88, 129.73, 131.52, 132.33, 134.83, 137.46, 144.38, 147.57.

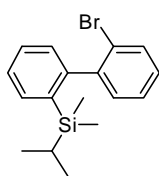

**1e:** Colorless liquid, isolated yield 88% (586 mg);  $^1\text{H}$  NMR (400 MHz,  $\text{CDCl}_3$ )  $\delta$ : 7.69 (d,  $J = 8.8$  Hz, 2H), 7.46-7.43 (m, 2H), 7.37 (t,  $J = 7.4$  Hz, 1H), 7.31-7.24 (m, 2H), 7.22 (d,  $J = 9.2$  Hz, 1H), 0.96-0.93 (m, 7H), 0.07 (s, 3H), -0.13 (s, 3H);  $^{13}\text{C}$  NMR (75 MHz,  $\text{CDCl}_3$ )  $\delta$ : -4.49, -4.46, 13.99, 17.69, 17.73, 124.38, 126.40, 126.62, 128.16, 128.83, 129.77, 131.47, 132.30, 135.09, 136.91, 144.47, 147.60; HRMS (ESI,  $m/z$ ) calcd for  $[\text{C}_{17}\text{H}_{21}\text{BrSi}]\text{Na}^+$ : 355.0488; found 355.0495.

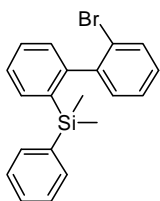

**1f:** Colorless liquid, isolated yield 64% (470 mg);  $^1\text{H}$  NMR (400 MHz,  $\text{CDCl}_3$ )  $\delta$ : 7.66 (d,  $J = 8.8$  Hz, 1H), 7.59 (d,  $J = 9.2$  Hz, 1H), 7.45-7.30 (m, 7H), 7.22-7.14 (m, 3H), 6.99 (d,  $J = 9.2$  Hz, 1H), 0.35 (s, 3H), 0.20 (s, 3H);  $^{13}\text{C}$  NMR (75 MHz,  $\text{CDCl}_3$ )  $\delta$ : -2.19, -0.99, 124.28, 126.39, 126.80, 127.56, 128.64, 128.72, 128.84, 129.94, 131.67, 132.24, 133.99, 135.61, 136.46, 139.21, 143.85, 147.80; HRMS (ESI,  $m/z$ ) calcd for  $[\text{C}_{20}\text{H}_{19}\text{BrSi}]\text{Na}^+$ : 389.0332; found 389.0336.

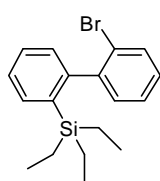

**1g:** Colorless liquid, isolated yield 82% (569 mg);  $^1\text{H}$  NMR (400 MHz,  $\text{CDCl}_3$ )  $\delta$ : 7.64-7.58 (m, 2H), 7.39-7.36 (m, 2H), 7.30 (t,  $J = 7.2$  Hz, 1H), 7.23-7.19 (m, 2H), 7.14 (d,  $J = 8.8$  Hz, 1H), 0.82 (t,  $J = 7.6$  Hz, 9H), 0.54-0.39 (m, 6H);  $^{13}\text{C}$  NMR (75 MHz,  $\text{CDCl}_3$ )  $\delta$ : 3.67, 7.47, 124.21, 126.40, 126.53, 128.06, 128.85, 130.01, 131.40, 132.35, 135.50, 135.56, 144.52, 147.95.

### Preparation of 3a and 3b:

To a toluene (100 mL) solution of  $\text{Cp}_2\text{ZrCl}_2$  (1.75 g, 6 mmol) was added an ether solution of  $\text{PhLi}$  (6 mL, 2 M, 12 mmol) at 0 °C. After stirring for 2 h, trimethyl(prop-1-ynyl)silane (673 mg, 6 mmol) was added to the mixture at 0 °C. The mixture was warmed to 110 °C and stirred for 9 h. Then, NBS (3.20 g, 18 mmol) and  $\text{CuCl}$  (653 mg, 6.6 mmol) were added at 0 °C, and the mixture was stirred for 12 h at room temperature. A saturated aqueous solution of  $\text{Na}_2\text{S}_2\text{O}_3$  was added, and the mixture was extracted with hexane. The combined extract was washed with brine, dried over  $\text{Na}_2\text{SO}_4$ , filtered, and evaporated. The residue was purified by silica gel column with petroleum ether as an eluent to afford product (Z)-(1-bromo-2-(2-bromophenyl)prop-1-en-1-yl)trimethylsilane (1.41 g, 84%).

To a solution of 750 mg (2.15 mmol) (Z)-(1-bromo-2-(2-bromophenyl)prop-1-enyl)trimethylsilane in 10 mL of THF was added dropwise, under an atmosphere of nitrogen, 1.40 mL of 1.6 M solution of *n*-BuLi (2.2 mmol) in *n*-hexane while the temperature was maintained at -78 °C. After addition, the mixture was stirred for 30 min and 282 mg (2.6 mmol) of chlorotrimethylsilane was added dropwise. Then the mixture was warmed to 20 °C, stirred for 1 h and subsequently hydrolyzed with 2 mL of a 3 M HCl solution. The mixture was extracted with hexane. The combined extract was dried over Na<sub>2</sub>SO<sub>4</sub>, filtered, and evaporated. The residue was purified by using silicon gel column with hexane as eluent to give the pure product of (Z)-(2-(1-bromo-1-(trimethylsilyl)hex-1-en-2-yl)phenyl)trimethylsilane 676 mg (92%).

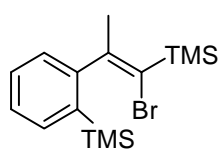

**3a:** Colorless oil, isolated yield 92% (676 mg); <sup>1</sup>H NMR (300 MHz, CDCl<sub>3</sub>) δ: 7.58-7.55 (m, 1H), 7.38-7.33 (m, 1H), 7.29-7.23 (m, 1H), 6.95-6.92 (m, 1H), 2.14 (s, 3H), 0.35 (s, 9H), 0.28 (s, 9H), <sup>13</sup>C NMR (75 MHz, CDCl<sub>3</sub>) δ: 0.59, 0.72, 25.78, 125.36, 126.00, 126.97, 129.09, 135.05, 135.49, 152.37, 153.05; HRMS (ESI, *m/z*) calcd. for [C<sub>15</sub>H<sub>25</sub>BrSi<sub>2</sub>]<sup>+</sup>Na<sup>+</sup> 353.0570; found 353.0579.

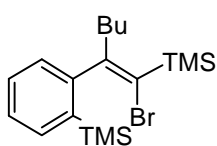

**3b:** Colorless oil, isolated yield 41% (367 mg); <sup>1</sup>H NMR (300 MHz, CDCl<sub>3</sub>) δ: 7.60-7.57 (m, 1H), 7.36-7.24 (m, 2H), 6.93-6.90 (m, 1H), 2.74-2.64 (m, 1H), 2.22-2.12 (m, 1H), 1.43-1.19 (m, 4H), 0.85 (t, *J* = 7.05 Hz, 3H), 0.35 (s, 9H), 0.27 (s, 9H); <sup>13</sup>C NMR (75 MHz, CDCl<sub>3</sub>) δ: 0.74, 0.88, 13.95, 22.81, 31.32, 38.75, 125.97, 126.44, 128.25, 128.59, 135.16, 135.79, 150.49, 157.84; HRMS (ESI, *m/z*) calcd. for [C<sub>18</sub>H<sub>31</sub>BrSi<sub>2</sub>]<sup>+</sup>Na<sup>+</sup> 405.1040; found 405.1050.

#### Preparation of 5a-k and 7a-c:

((2-Bromophenyl)ethynyl)trimethylsilane was prepared according the literature method.<sup>2</sup> Under nitrogen, 1-bromo-2-iodobenzene (5.66 g, 20 mmol), ethynyltrimethylsilane (2.16 g, 22 mmol), PdCl<sub>2</sub>(PPh<sub>3</sub>)<sub>2</sub> (70 mg, 0.5 mol%), CuI (38 mg, 1 mol%) was added in 15 mL THF and 15 mL NEt<sub>3</sub>. The reaction mixture was stirred at room temperature until complete consumption of the starting material as monitored by TLC. After the reaction was finished, diethyl ether was poured into the mixture. The mixture was then washed with brine, extracted with diethyl ether, dried with anhydrous

Na<sub>2</sub>SO<sub>4</sub>, and evaporated under vacuum. The residue was purified by using silica gel column with petroleum ether as an eluent to afford ((2-bromophenyl)ethynyl)trimethylsilane (5 g, >99%).

(*Z*)-(2-(2-Bromophenyl)-1-iodo-2-(2-iodophenyl)vinyl)trimethylsilane was prepared according literature.<sup>3</sup> To a toluene (100 mL) solution of Cp<sub>2</sub>ZrCl<sub>2</sub> (3212 mg, 11 mmol) was added an ether solution of PhLi (11 mL, 2 M, 22 mmol) at 0 °C. After stirring for 2 h, ((2-bromophenyl)ethynyl)trimethylsilane (2530 mg, 10 mmol) was added to the mixture at 0 °C. The mixture was warmed to 100 °C and stirred for 12 h. Then, iodine (10.16 g, 40 mmol) and CuCl (2.08 g, 21 mmol) was added at 0 °C, and the mixture was stirred 12 h at room temperature. A saturated aqueous solution of Na<sub>2</sub>S<sub>2</sub>O<sub>3</sub> was added, and the mixture was extracted with hexane. The combined extract was washed with brine, dried over Na<sub>2</sub>SO<sub>4</sub>, filtered, and evaporated. The residue was purified by using SiO<sub>2</sub> column with petroleum ether as an eluent to afford product (*Z*)-(2-(2-bromophenyl)-1-iodo-2-(2-iodophenyl)vinyl)trimethylsilane (5.43 g, 93%).

Compounds **5a-k** and **7a-c** were prepared by a modified procedure according the literature.<sup>4</sup> Under nitrogen, Pd(OAc)<sub>2</sub> (5 mol%) and Xantphos (10 mol%) was added in 5 mL toluene. After this reaction mixture was stirred at room temperature for 15 min, (*Z*)-(2-(2-bromophenyl)-1-iodo-2-(2-iodophenyl)vinyl)trimethylsilane (1 mmol), amine (1.2 mmol), Cs<sub>2</sub>CO<sub>3</sub> (2 mmol) were added and this reaction mixture was stirred at 120 °C for 10 h. The reaction mixture was quenched with water and extracted with Et<sub>2</sub>O. The extraction was washed with brine and dried over Na<sub>2</sub>SO<sub>4</sub>. The solvent was then evaporated in vacuo and the residue was purified by using silica gel column with petroleum ether and ethyl acetate as eluent (100:1) to afford the final products.

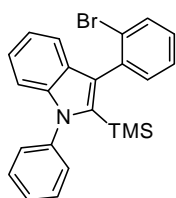

**5a**: Colorless solid, isolated yield 82% (349 mg); mp: 124.1-124.8 °C; <sup>1</sup>H NMR (400 MHz, CDCl<sub>3</sub>) δ: 7.90 (d, *J* = 7.6 Hz, 1H), 7.72-7.63 (m, 6H), 7.56 (t, *J* = 7.4 Hz, 1H), 7.49-7.36 (m, 2H), 7.34-7.27 (m, 3H), 0.01 (s, 9H); <sup>13</sup>C NMR (75 MHz, CDCl<sub>3</sub>) δ: 0.25, 110.24, 119.73, 119.84, 122.75, 126.24, 126.76, 128.07, 128.20, 128.30, 128.35, 128.82, 129.07, 129.15, 132.47, 133.51, 138.03, 140.21, 140.37; HRMS (ESI, *m/z*) calcd for [C<sub>23</sub>H<sub>22</sub>BrNSi]<sup>+</sup>: 420.0778; found 420.0772.

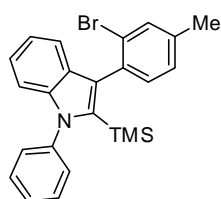

**5b:** Colorless solid, isolated yield 81% (352 mg); mp: 154.1-155.2 °C;  $^1\text{H}$  NMR (300 MHz,  $\text{CDCl}_3$ )  $\delta$ : 7.53-7.45 (m, 6H), 7.32-7.27 (m, 2H), 7.16-7.07 (m, 4H), 2.40 (s, 3H), -0.19 (s, 9H);  $^{13}\text{C}$  NMR (75 MHz,  $\text{CDCl}_3$ )  $\delta$ : 0.30, 20.89, 110.19, 119.76, 122.68, 125.82, 127.64, 128.11, 128.14, 128.25, 128.94, 129.13, 132.89, 132.92, 133.14, 134.77, 138.04, 138.89, 140.09, 140.39; HRMS (ESI,  $m/z$ ) calcd for  $[\text{C}_{24}\text{H}_{24}\text{BrNSi}]^{\text{H}^+}$ : 434.0934; found 434.0932.

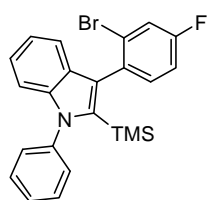

**5c:** Colorless solid, isolated yield 86% (377 mg); mp: 122.2-123.9 °C;  $^1\text{H}$  NMR (300 MHz,  $\text{CDCl}_3$ )  $\delta$ : 7.71-7.57 (m, 7H), 7.45 (d,  $J = 7.5$  Hz, 1H), 7.36-7.27 (m, 4H), 0.19 (s, 9H);  $^{13}\text{C}$  NMR (75 MHz,  $\text{CDCl}_3$ )  $\delta$ : 0.26, 110.30, 114.01 (d,  $J = 21.0$  Hz), 119.49, 119.79, 119.92, 122.82, 126.26 (d,  $J = 9.3$  Hz), 127.08, 127.99, 128.27, 128.98 (d,  $J = 8.0$  Hz), 129.18, 133.99, 134.07 (d,  $J = 3.75$  Hz), 138.32, 140.11, 140.18, 161.74 (d,  $J = 248.48$  Hz); HRMS (ESI,  $m/z$ ) calcd for  $[\text{C}_{23}\text{H}_{21}\text{BrFNSi}]^{\text{H}^+}$ : 438.0683; found 438.0682.

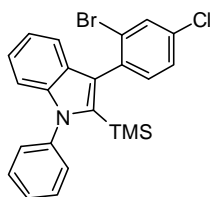

**5d:** Colorless solid, isolated yield 83% (377 mg); mp: 116.8-118.2 °C;  $^1\text{H}$  NMR (300 MHz,  $\text{CDCl}_3$ )  $\delta$ : 7.73 (s, 1H), 7.53-7.45 (m, 4H), 7.24 (d,  $J = 8.4$  Hz, 2H), 7.20-7.16 (m, 3H), 7.15-7.07 (m, 2H), -0.18 (s, 9H);  $^{13}\text{C}$  NMR (75 MHz,  $\text{CDCl}_3$ )  $\delta$ : 0.32, 110.35, 119.49, 119.99, 122.87, 126.55, 126.99, 127.09, 127.83, 128.32, 128.96, 129.02, 129.20, 132.10, 133.72, 134.03, 136.72, 138.28, 140.17; HRMS (ESI,  $m/z$ ) calcd for  $[\text{C}_{23}\text{H}_{21}\text{BrClNSi}]^{\text{H}^+}$ : 454.0388; found 454.0382.

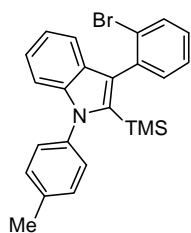

**5e:** Colorless solid, isolated yield 86% (373 mg); mp: 125.2-126.0 °C;  $^1\text{H}$  NMR (300 MHz,  $\text{CDCl}_3$ )  $\delta$ : 7.69 (d,  $J = 7.8$  Hz, 1H), 7.43 (d,  $J = 7.5$  Hz, 1H), 7.37-7.20 (m, 7H), 7.15-7.05 (m, 3H), 2.46 (s, 3H), -0.19 (s, 9H);  $^{13}\text{C}$  NMR (75 MHz,  $\text{CDCl}_3$ )  $\delta$ : 0.29, 21.27, 110.29, 119.65, 119.71, 122.61, 126.24, 126.73, 127.97, 128.02, 128.77, 129.71 (2C), 132.42, 133.50, 137.65, 138.05, 138.08, 138.10, 140.23; HRMS (ESI,  $m/z$ ) calcd for  $[\text{C}_{24}\text{H}_{24}\text{BrNSi}]^{\text{H}^+}$ : 434.0934; found 434.0943.

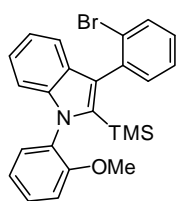

**5f:** Pale yellow oil, isolated yield 81% (365 mg);  $^1\text{H}$  NMR (300 MHz,  $\text{CDCl}_3$ )  $\delta$ : 7.69 (d,  $J$  = 8.1 Hz, 1H), 7.47-7.33 (m, 4H), 7.28-7.21 (m, 2H), 7.14-7.04 (m, 4H), 6.93 (t,  $J$  = 3.9 Hz, 1H), 3.71 (s, 3H), -0.21 (s, 9H);  $^{13}\text{C}$  NMR (75 MHz,  $\text{CDCl}_3$ )  $\delta$ : -0.13, 55.28, 110.17, 111.58, 119.41, 119.54, 120.38, 122.41, 126.41, 126.61, 126.66, 128.13, 128.60, 128.68, 129.90, 131.53, 132.30, 132.38, 133.65, 138.15, 140.13, 156.54; HRMS (ESI,  $m/z$ ) calcd for  $[\text{C}_{24}\text{H}_{24}\text{BrNOSi}]^+\text{H}^+$ : 450.0883; found 450.0882.

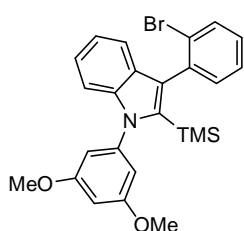

**5g:** Pale yellow solid, isolated yield 92% (442 mg); mp: 116.2-117.0 °C;  $^1\text{H}$  NMR (300 MHz,  $\text{CDCl}_3$ )  $\delta$ : 7.69 (d,  $J$  = 8.1 Hz, 1H), 7.45-7.33 (m, 2H), 7.29-7.14 (m, 4H), 7.08 (t,  $J$  = 7.05 Hz, 1H), 6.71 (s, 1H), 6.58 (s, 2H), 3.82 (s, 6H), -0.12 (s, 9H);  $^{13}\text{C}$  NMR (75 MHz,  $\text{CDCl}_3$ )  $\delta$ : 0.30, 55.52, 100.46, 106.98, 110.38, 119.75, 119.88, 122.79, 126.11, 126.76, 127.94, 128.37, 128.84, 132.46, 133.47, 137.76, 137.94, 139.75, 141.94, 160.94; HRMS (ESI,  $m/z$ ) calcd for  $[\text{C}_{25}\text{H}_{26}\text{BrNO}_2\text{Si}]^+\text{H}^+$ : 480.0989; found 480.0990.

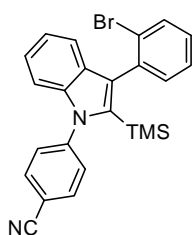

**5h:** Pale yellow solid, isolated yield 84% (366 mg); mp: 62.5-63.2 °C;  $^1\text{H}$  NMR (300 MHz,  $\text{CDCl}_3$ )  $\delta$ : 7.86 (d,  $J$  = 7.5 Hz, 2H), 7.72 (d,  $J$  = 7.8 Hz, 1H), 7.63-7.60 (m, 2H), 7.43-7.36 (m, 2H), 7.31-7.29 (m, 2H), 7.26-7.10 (m, 3H), -0.17 (s, 9H);  $^{13}\text{C}$  NMR (75 MHz,  $\text{CDCl}_3$ )  $\delta$ : 0.38, 100.46, 109.68, 111.65, 118.20, 120.19, 120.61, 123.48, 125.88, 126.91, 128.36, 129.15, 129.43, 130.18, 132.61, 133.28, 137.28, 137.63, 139.57, 144.69; HRMS (ESI,  $m/z$ ) calcd for  $[\text{C}_{24}\text{H}_{21}\text{BrN}_2\text{Si}]^+\text{H}^+$ : 445.0730; found 445.0721.

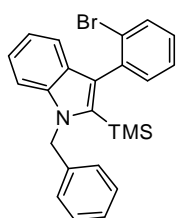

**5i:** Colorless solid, isolated yield 79% (343 mg); mp: 83.8-83.6 °C;  $^1\text{H}$  NMR (400 MHz,  $\text{CDCl}_3$ )  $\delta$ : 7.66 (d,  $J$  = 7.8 Hz, 1H), 7.40-7.29 (m, 2H), 7.26-7.17 (m, 5H), 7.10 (d,  $J$  = 3.6 Hz, 2H), 7.03-7.01 (m, 1H), 6.92 (d,  $J$  = 7.5 Hz, 2H), 5.55 (s, 2H), 0.01 (s, 9H);  $^{13}\text{C}$  NMR (75 MHz,  $\text{CDCl}_3$ )  $\delta$ : 0.23, 49.68, 109.86, 119.56, 119.66, 122.62, 125.67, 126.68, 127.08, 128.63, 128.72, 128.78, 128.90, 132.25, 133.37, 137.05, 138.15, 138.25, 138.27, 138.75; HRMS (ESI,  $m/z$ ) calcd for  $[\text{C}_{24}\text{H}_{24}\text{BrNSi}]^+\text{H}^+$ : 434.0934; found 434.0943.



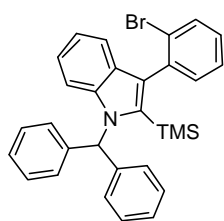

**5j:** Pale yellow solid, isolated yield 74% (377 mg); mp: 128.6-129.3 °C;  $^1\text{H}$  NMR (400 MHz,  $\text{CDCl}_3$ )  $\delta$ : 7.68 (d,  $J = 9.2$  Hz, 1H), 7.43 (d,  $J = 9.2$  Hz, 1H), 7.37-7.23 (m, 10H), 7.16-7.11 (m, 4H), 6.93 (d,  $J = 7.4$  Hz, 1H), 6.83 (d,  $J = 8.2$  Hz, 1H), 6.65 (d,  $J = 8.4$  Hz, 1H), 0.03 (s, 9H);  $^{13}\text{C}$  NMR (75 MHz,  $\text{CDCl}_3$ )  $\delta$ : 0.37, 65.20, 113.16, 119.19, 119.55, 122.09, 126.70, 126.84, 127.43, 127.54, 128.06, 128.27, 128.46, 128.77, 129.95, 132.24, 133.27, 138.22, 138.24, 139.41; HRMS (ESI,  $m/z$ ) calcd for  $[\text{C}_{24}\text{H}_{24}\text{BrNSi}]\text{H}^+$ : 510.1247; found 510.1255.

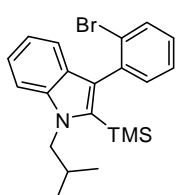

**5k:** Colorless solid, isolated yield 83% (332 mg); mp: 98.0-98.6 °C;  $^1\text{H}$  NMR (300 MHz,  $\text{CDCl}_3$ )  $\delta$ : 7.66 (d,  $J = 8.1$  Hz, 1H), 7.39-7.28 (m, 3H), 7.22-7.17 (m, 3H), 7.03 (t,  $J = 7.5$  Hz, 1H), 4.08 (t,  $J = 8.4$  Hz, 2H), 2.39-2.30 (m, 1H), 0.94 (d,  $J = 6.6$  Hz, 3H), 0.88 (d,  $J = 6.6$  Hz, 3H), 0.13 (s, 9H);  $^{13}\text{C}$  NMR (75 MHz,  $\text{CDCl}_3$ )  $\delta$ : 1.07, 20.05, 20.29, 29.74, 53.39, 110.27, 119.02, 119.64, 122.00, 126.59, 126.61, 126.97, 128.49, 128.66, 132.25, 133.48, 136.75, 138.24, 138.60; HRMS (ESI,  $m/z$ ) calcd for  $[\text{C}_{21}\text{H}_{26}\text{BrNSi}]\text{H}^+$ : 400.1091; found 400.1082.

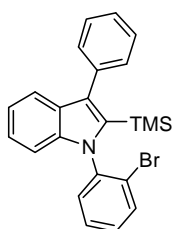

**7a:** Yellow oil, isolated yield 72% (301 mg);  $^1\text{H}$  NMR (300 MHz,  $\text{CDCl}_3$ )  $\delta$ : 7.76 (d,  $J = 7.5$  Hz, 1H), 7.52-7.36 (m, 9H), 7.20-7.07 (m, 2H), 6.89 (d,  $J = 7.8$  Hz, 1H), -0.17 (s, 9H);  $^{13}\text{C}$  NMR (75 MHz,  $\text{CDCl}_3$ )  $\delta$ : 0.54, 110.45, 119.51, 120.08, 122.96, 124.61, 126.86, 127.93, 128.12, 128.69, 130.03, 130.13, 131.02, 131.63, 133.53, 136.57, 136.93, 139.54, 139.93; HRMS (ESI,  $m/z$ ) calcd. for  $[\text{C}_{23}\text{H}_{22}\text{BrNSi}]\text{H}^+$ : 420.0777; found 420.0785.

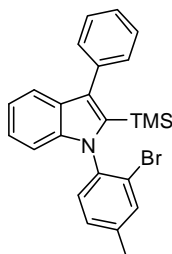

**7b:** Yellow oil, isolated yield 68% (295 mg);  $^1\text{H}$  NMR (300 MHz,  $\text{CDCl}_3$ )  $\delta$ : 7.58-7.52 (m, 1H), 7.49-7.24 (m, 7H), 7.16-7.09 (m, 3H), 6.89 (d,  $J = 7.5$  Hz, 1H), 2.43 (s, 3H), -0.15 (s, 9H);  $^{13}\text{C}$  NMR (75 MHz,  $\text{CDCl}_3$ )  $\delta$ : 0.59, 20.94, 110.46, 119.44, 119.97, 122.86, 124.15, 126.79, 127.89, 128.65, 128.83, 129.91, 131.03, 131.12, 133.84, 136.67, 136.99, 137.18, 139.65, 140.42; HRMS (ESI,  $m/z$ ) calcd. for  $[\text{C}_{24}\text{H}_{24}\text{BrNSi}]\text{H}^+$ : 434.0934; found 434.0940.

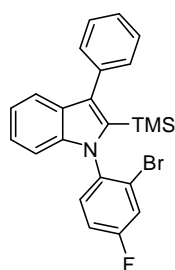

**7c:** Yellow oil, isolated yield 76% (332 mg);  $^1\text{H}$  NMR (300 MHz,  $\text{CDCl}_3$ ):  $\delta$ : 7.50-7.38 (m, 8H), 7.21-7.10 (m, 3H), 6.89-6.84 (m, 1H), -0.12 (s, 9H);  $^{13}\text{C}$  NMR (75 MHz,  $\text{CDCl}_3$ )  $\delta$ : 0.59, 110.19, 115.24 (d,  $J = 24.1$  Hz), 119.59, 120.25, 120.67 (d,  $J = 25.3$  Hz), 123.13, 125.28 (d,  $J = 9.9$  Hz), 126.94, 127.95, 128.78, 130.35, 130.98, 132.41 (d,  $J = 7.5$  Hz), 136.28, 136.42, 136.90, 139.67, 161.97 (d,  $J = 251$  Hz); HRMS (ESI,  $m/z$ ) calcd. for  $[\text{C}_{23}\text{H}_{22}\text{BrFNSi}]^+\text{H}^+$ : 438.0683; found 438.0686.

### Preparation of 10:

1-(*tert*-Butyl)-2-iodobenzene was prepared according the literature method.<sup>5</sup> Under nitrogen, 1-(*tert*-butyl)-2-iodobenzene (2 mmol), 2-bromobenzeneboronic acid (2.4 mmol),  $\text{Pd}(\text{PPh}_3)_4$  (5 mol%) and  $\text{K}_2\text{CO}_3$  (6 mmol) were added in 10 mL ethanol and this reaction mixture was stirred at 90 °C for 8 h. The reaction mixture was quenched with water and extracted with  $\text{Et}_2\text{O}$ . The extraction was washed with brine and dried over  $\text{Na}_2\text{SO}_4$ . The solvent was then evaporated in vacuo and the residue was purified by using silica gel column with petroleum ether to afford the product 2-bromo-2'-*tert*-butyldibromobiphenyl.

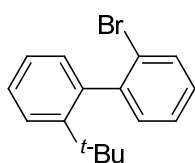

Colorless liquid, isolated yield 51% (291 mg);  $^1\text{H}$  NMR (300 MHz,  $\text{CDCl}_3$ )  $\delta$ : 7.59-7.66 (m, 2H), 7.24-7.40 (m, 5H), 6.96-6.99 (d,  $J = 7.5$  Hz, 1H), 1.25 (s, 9H);  $^{13}\text{C}$  NMR (75 MHz,  $\text{CDCl}_3$ )  $\delta$ : 32.17, 36.53, 124.93, 125.16, 126.08, 127.34, 127.72, 128.40, 131.82, 132.10, 132.29, 139.98, 145.53, 147.21.

### 3) Reaction Condition Optimization of the Pd-catalyzed Reaction of 1a

**STable 1.** Reaction Condition Optimization of the Pd-Catalyzed Reaction of **1a**<sup>a</sup>

| Entry | Pd (5%) | Ligand | Base | Solvent | Yield <sup>b</sup> |
|-------|---------|--------|------|---------|--------------------|

|                 |                                    |                            |                                 |                    |                      |
|-----------------|------------------------------------|----------------------------|---------------------------------|--------------------|----------------------|
| 1               | Pd(OAc) <sub>2</sub>               | <i>Pt</i> -Bu <sub>3</sub> | NaOt-Bu                         | Dioxane            | 45                   |
| 2               | [Pd( $\pi$ -allyl)Cl] <sub>2</sub> | <i>Pt</i> -Bu <sub>3</sub> | NaOt-Bu                         | Dioxane            | 45                   |
| 3               | Pd <sub>2</sub> (dba) <sub>3</sub> | <i>Pt</i> -Bu <sub>3</sub> | NaOt-Bu                         | Dioxane            | 13                   |
| 4               | Pd(PPh <sub>3</sub> ) <sub>4</sub> | <i>Pt</i> -Bu <sub>3</sub> | NaOt-Bu                         | Dioxane            | 75 (64)              |
| 5               | PdBr <sub>2</sub>                  | <i>Pt</i> -Bu <sub>3</sub> | NaOt-Bu                         | Dioxane            | 68                   |
| 6               | Pd(PPh <sub>3</sub> ) <sub>4</sub> | PCy <sub>3</sub>           | NaOt-Bu                         | Dioxane            | 41                   |
| 7               | Pd(PPh <sub>3</sub> ) <sub>4</sub> | X-phose                    | NaOt-Bu                         | Dioxane            | 56                   |
| 8               | Pd(PPh <sub>3</sub> ) <sub>4</sub> | DPPF                       | NaOt-Bu                         | Dioxane            | 11                   |
| 9               | Pd(PPh <sub>3</sub> ) <sub>4</sub> | Xantphos                   | NaOt-Bu                         | Dioxane            | 16                   |
| 10              | Pd(PPh <sub>3</sub> ) <sub>4</sub> | Ph <sub>3</sub> P          | NaOt-Bu                         | Dioxane            | 28                   |
| 11              | Pd(PPh <sub>3</sub> ) <sub>4</sub> | (2-furan) <sub>3</sub> P   | NaOt-Bu                         | Dioxane            | 51                   |
| 12              | Pd(PPh <sub>3</sub> ) <sub>4</sub> | DPPP                       | NaOt-Bu                         | Dioxane            | Trace                |
| 13              | Pd(PPh <sub>3</sub> ) <sub>4</sub> | DPE-phos                   | NaOt-Bu                         | Dioxane            | 53                   |
| 14              | Pd(PPh <sub>3</sub> ) <sub>4</sub> |                            | NaOt-Bu                         | Dioxane            | 63                   |
| 15              | Pd(PPh <sub>3</sub> ) <sub>4</sub> | <i>Pt</i> -Bu <sub>3</sub> | LiOt-Bu                         | Dioxane            | 9                    |
| 16              | Pd(PPh <sub>3</sub> ) <sub>4</sub> | <i>Pt</i> -Bu <sub>3</sub> | KOt-Bu                          | Dioxane            | Trace                |
| 17              | Pd(PPh <sub>3</sub> ) <sub>4</sub> | <i>Pt</i> -Bu <sub>3</sub> | Cs <sub>2</sub> CO <sub>3</sub> | Dioxane            | Trace                |
| 18              | Pd(PPh <sub>3</sub> ) <sub>4</sub> | <i>Pt</i> -Bu <sub>3</sub> | K <sub>2</sub> CO <sub>3</sub>  | Dioxane            | Trace                |
| 19              | Pd(PPh <sub>3</sub> ) <sub>4</sub> | <i>Pt</i> -Bu <sub>3</sub> | CsF                             | Dioxane            | Trace                |
| 20              | Pd(PPh <sub>3</sub> ) <sub>4</sub> | <i>Pt</i> -Bu <sub>3</sub> | NEt <sub>3</sub>                | Dioxane            | Trace                |
| 21              | Pd(PPh <sub>3</sub> ) <sub>4</sub> | <i>Pt</i> -Bu <sub>3</sub> | TBAF                            | Dioxane            | Trace                |
| 22              | Pd(PPh <sub>3</sub> ) <sub>4</sub> | <i>Pt</i> -Bu <sub>3</sub> | KOH                             | Dioxane            | Trace                |
| 23              | Pd(PPh <sub>3</sub> ) <sub>4</sub> | <i>Pt</i> -Bu <sub>3</sub> | NaOAc                           | Dioxane            | Trace                |
| 24              | Pd(PPh <sub>3</sub> ) <sub>4</sub> | <i>Pt</i> -Bu <sub>3</sub> | NaOt-Bu                         | Toluene            | 77 (70)              |
| 25              | Pd(PPh <sub>3</sub> ) <sub>4</sub> | <i>Pt</i> -Bu <sub>3</sub> | NaOt-Bu                         | DMF                | Trace                |
| 26              | Pd(PPh <sub>3</sub> ) <sub>4</sub> | <i>Pt</i> -Bu <sub>3</sub> | NaOt-Bu                         | CH <sub>3</sub> CN | Trace                |
| 27              | Pd(PPh <sub>3</sub> ) <sub>4</sub> | <i>Pt</i> -Bu <sub>3</sub> | NaOt-Bu                         | NMP                | Trace                |
| 28              | Pd(PPh <sub>3</sub> ) <sub>4</sub> | <i>Pt</i> -Bu <sub>3</sub> | NaOt-Bu                         | DME                | Trace                |
| 29 <sup>c</sup> | Pd(PPh <sub>3</sub> ) <sub>4</sub> | <i>Pt</i> -Bu <sub>3</sub> | NaOt-Bu                         | Toluene            | 83 (74) <sup>c</sup> |

<sup>a</sup> Conditions: **1a** (0.3 mmol), Pd catalyst (5 mol%), ligand (10 mol%), base (0.9 mmol), solvent (2 mL), 120 °C, 12 h. <sup>b</sup> GC yield (*n*-C<sub>12</sub>H<sub>26</sub> as internal standard), isolated yield in parenthesis. <sup>c</sup> with TBAB (20 mol%).

#### 4) Typical Procedure for the Preparation and Characterization of 2, 4, 6 and 8

Under the protection of nitrogen, Pd(PPh<sub>3</sub>)<sub>4</sub> (5 mol%), Pt-Bu<sub>3</sub> (10 mol%) and NaO*t*-Bu (0.9 mmol), were added in 2 mL of toluene. After this reaction mixture was stirred at room temperature for 15 min, **1**, **3**, **5**, or **7** (0.3 mmol), TBAB (20 mol%) were added and this reaction mixture was stirred at 120 °C for 12 h. The reaction mixture was quenched with water and extracted with Et<sub>2</sub>O. The extraction was washed with brine and dried over MgSO<sub>4</sub>. The solvent was then evaporated in vacuo and the residue was purified by using silicon gel column with petroleum ether and ethyl acetate as eluent to afford the final products.

**2a**: Colorless oil, isolated yield 74% (50 mg); <sup>1</sup>H NMR (400 MHz, CDCl<sub>3</sub>) δ: 7.68 (d, *J* = 8.0 Hz, 1H), 7.61 (d, *J* = 7.6 Hz, 1H), 7.54 (d, *J* = 8.4 Hz, 1H), 7.47 (t, *J* = 7.6 Hz, 1H), 7.30 (t, *J* = 7.2 Hz, 1H), 7.26-7.16 (m, 3H), 2.17 (s, 2H), 0.21 (s, 6H); <sup>13</sup>C NMR (75 MHz, CDCl<sub>3</sub>) δ: -4.35 (2C), 21.25, 126.11 (2C), 126.56, 127.45, 127.93, 130.19, 131.21, 132.52, 135.48, 136.17, 137.55, 144.44; HRMS (ESI, *m/z*) calcd for [C<sub>15</sub>H<sub>16</sub>Si]<sup>+</sup>: 225.1094; found 225.1093.

**2b**: Colorless solid, isolated yield 58% (49 mg); mp: 94.2-94.8 °C; <sup>1</sup>H NMR (400 MHz, CDCl<sub>3</sub>) δ: 7.48 (s, 1H), 7.37 (s, 1H), 7.27 (s, 1H), 6.94 (s, 1H), 2.32 (s, 3H), 2.29 (s, 3H), 2.27 (s, 3H), 2.23 (s, 3H), 2.06 (s, 2H), 0.19 (s, 6H); <sup>13</sup>C NMR (75 MHz, CDCl<sub>3</sub>) δ: -4.09, 19.26, 19.31, 19.45, 20.12, 20.60, 127.12, 128.80, 132.29, 132.70, 133.07, 133.78, 133.88, 134.52, 134.96, 135.32, 138.48, 142.32; HRMS (ESI, *m/z*) calcd for [C<sub>19</sub>H<sub>24</sub>Si]<sup>+</sup>: 281.1720; found 281.1716.

**2c**: Colorless solid, isolated yield 42% (43 mg); mp: 155.2-155.8 °C; <sup>1</sup>H NMR (400 MHz, CDCl<sub>3</sub>) δ: 7.16 (s, 1H), 7.09 (s, 1H), 6.99 (s, 1H), 6.71 (s, 1H), 3.97 (s, 3H), 3.94 (s, 3H), 3.93 (s, 3H), 3.91 (s, 3H), 2.06 (s, 2H), 0.21 (s, 6H); <sup>13</sup>C NMR (75 MHz, CDCl<sub>3</sub>) δ: -4.16, 20.70, 55.78, 55.89, 55.95, 56.19, 109.63, 111.31, 114.43, 114.82, 126.46, 128.35, 129.77, 137.95, 147.05, 147.51, 147.71, 150.51; HRMS (ESI, *m/z*) calcd for [C<sub>19</sub>H<sub>24</sub>O<sub>4</sub>Si]<sup>+</sup>: 345.1517; found 345.1522.

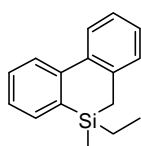

**2d:** Colorless oil, isolated yield 69% (49 mg);  $^1\text{H}$  NMR (400 MHz,  $\text{CDCl}_3$ )  $\delta$ : 7.68 (d,  $J = 7.6$  Hz, 1H), 7.58 (d,  $J = 8.0$  Hz, 1H), 7.51 (d,  $J = 7.2$  Hz, 1H), 7.45 (t,  $J = 7.8$  Hz, 1H), 7.28 (t,  $J = 7.2$  Hz, 1H), 7.24-7.13 (m, 3H), 2.20-2.12 (m, 2H), 0.89 (t,  $J = 7.8$  Hz, 3H), 0.70-0.64 (m, 2H), 0.21 (s, 3H);  $^{13}\text{C}$  NMR (75 MHz,  $\text{CDCl}_3$ )  $\delta$ : -6.46, 4.37, 7.33, 19.50, 126.09, 126.14, 126.47, 127.43, 127.94, 130.17, 131.16, 132.81, 134.66, 136.18, 137.68, 144.70; HRMS (ESI,  $m/z$ ) calcd for  $[\text{C}_{16}\text{H}_{18}\text{Si}]^+$ : 239.1251; found 239.1247.

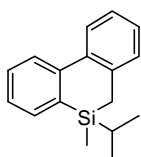

**2e:** Colorless oil, isolated yield 79% (60 mg);  $^1\text{H}$  NMR (400 MHz,  $\text{CDCl}_3$ )  $\delta$ : 7.69 (d,  $J = 8.0$  Hz, 1H), 7.57 (d,  $J = 8.0$  Hz, 1H), 7.52 (d,  $J = 7.2$  Hz, 1H), 7.46 (t,  $J = 7.8$  Hz, 1H), 7.28 (t,  $J = 7.4$  Hz, 1H), 7.23-7.14 (m, 3H), 2.22-2.14 (m, 2H), 0.90-0.87 (m, 7H), 0.23 (s, 3H);  $^{13}\text{C}$  NMR (75 MHz,  $\text{CDCl}_3$ )  $\delta$ : -8.21, 11.37, 17.39, 17.54, 18.64, 126.09, 126.16, 126.42, 127.46, 127.96, 130.14, 131.08, 133.22, 134.21, 136.22, 137.87, 144.90; HRMS (ESI,  $m/z$ ) calcd for  $[\text{C}_{17}\text{H}_{20}\text{Si}]^+$ : 253.1407; found 253.1407.

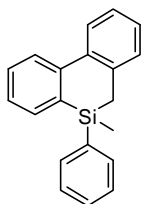

**2f:** Colorless oil, isolated yield 53% (46 mg);  $^1\text{H}$  NMR (400 MHz,  $\text{CDCl}_3$ )  $\delta$ : 7.74 (d,  $J = 7.6$  Hz, 1H), 7.63 (d,  $J = 8.0$  Hz, 1H), 7.50-7.43 (m, 4H), 7.35-7.14 (m, 7H), 2.54-2.32 (m, 2H), 0.51 (s, 3H);  $^{13}\text{C}$  NMR (75 MHz,  $\text{CDCl}_3$ )  $\delta$ : -5.90, 20.55, 126.17, 126.34, 126.62, 127.61, 127.82, 127.98, 129.55, 130.51, 131.45, 133.63, 133.77, 134.44, 135.22, 135.49, 137.67, 144.90; HRMS (ESI,  $m/z$ ) calcd for  $[\text{C}_{20}\text{H}_{18}\text{Si}]^+$ : 287.1251; found 287.1251.

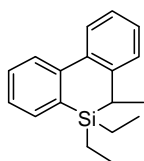

**2g:** Colorless oil, isolated yield 41% (33 mg);  $^1\text{H}$  NMR (400 MHz,  $\text{CDCl}_3$ )  $\delta$ : 7.67 (d,  $J = 7.6$  Hz, 1H), 7.56 (d,  $J = 9.6$  Hz, 1H), 7.50-7.43 (m, 2H), 7.29-7.21 (m, 4H), 2.34-2.28 (m, 1H), 1.21 (d,  $J = 7.2$  Hz, 3H), 0.97 (t,  $J = 7.8$  Hz, 3H), 0.85 (d,  $J = 7.8$  Hz, 3H), 0.81-0.65 (m, 4H);  $^{13}\text{C}$  NMR (75 MHz,  $\text{CDCl}_3$ )  $\delta$ : 0.91, 2.21, 7.35, 7.42, 14.65, 21.82, 126.05, 126.08, 126.46, 127.74, 128.30, 128.67, 130.13, 132.80, 133.62, 137.46, 141.95, 144.73; HRMS (ESI,  $m/z$ ) calcd for  $[\text{C}_{18}\text{H}_{22}\text{Si}]^+$ : 267.1564; found 267.1558.

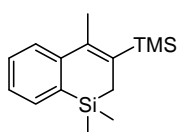

**4a:** Colorless oil, isolated yield 46% (36 mg);  $^1\text{H}$  NMR (400 MHz,  $\text{CDCl}_3$ )  $\delta$ : 7.43 (d,  $J = 7.2$  Hz, 1H), 7.37-7.35 (m, 2H), 7.20-7.17 (m, 1H), 2.23 (s, 3H), 1.52 (s, 2H), 0.23 (s, 9H), 0.21 (s, 6H);  $^{13}\text{C}$  NMR (75 MHz,

CDCl<sub>3</sub>)  $\delta$ : -4.46, 0.66, 17.07, 23.01, 124.84, 126.02, 129.53, 131.73, 133.07, 135.61, 141.17, 145.91; HRMS (ESI, *m/z*) calcd for [C<sub>15</sub>H<sub>24</sub>Si<sub>2</sub>]<sup>+</sup>: 259.1333; found 259.1330.

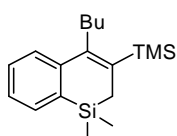

**4b**: Colorless oil, isolated yield 76% (69 mg); <sup>1</sup>H NMR (400 MHz, CDCl<sub>3</sub>)  $\delta$ : 7.44 (d, *J* = 6.8 Hz, 1H), 7.37-7.35 (m, 2H), 7.20-7.16 (m, 1H), 2.66 (t, *J* = 7.4 Hz, 2H), 1.48 (s, 2H), 1.32-1.26 (m, 4H), 0.86 (t, *J* = 6.8 Hz, 3H), 0.23 (s, 9H), 0.21 (s, 6H); <sup>13</sup>C NMR (75 MHz, CDCl<sub>3</sub>)  $\delta$ : -4.61, 0.88, 14.08, 16.99, 22.91, 32.49, 35.26, 124.84, 125.90, 129.47, 131.91, 134.81, 136.76, 144.15, 146.87; HRMS (ESI, *m/z*) calcd for [C<sub>18</sub>H<sub>30</sub>Si<sub>2</sub>]<sup>+</sup>: 303.1959; found 303.1967.

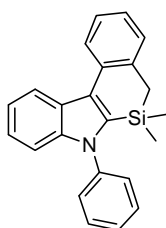

**6a**: Pale yellow solid, isolated yield 91% (93 mg); mp: 110.5-111.6 °C; <sup>1</sup>H NMR (400 MHz, CDCl<sub>3</sub>)  $\delta$ : 8.18-8.15 (m, 1H), 7.99 (d, *J* = 7.6 Hz, 1H), 7.50-7.46 (m, 2H), 7.42-7.38 (m, 3H), 7.34-7.32 (m, 1H), 7.29-7.20 (m, 4H), 7.08 (t, *J* = 7.4 Hz, 1H), 2.20 (s, 2H), -0.04 (s, 6H); <sup>13</sup>C NMR (75 MHz, CDCl<sub>3</sub>)  $\delta$ : -3.55, 22.64, 110.63, 120.42, 120.54, 122.79, 125.01, 125.53, 125.70, 126.15, 126.29, 127.21, 127.72, 129.34, 131.07, 134.49, 134.60, 138.05, 140.26, 140.34; HRMS (ESI, *m/z*) calcd for [C<sub>23</sub>H<sub>21</sub>NSi]<sup>+</sup>: 340.1516; found 340.1520.

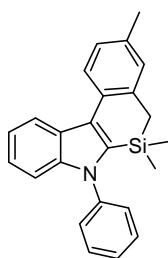

**6b**: Colorless solid, isolated yield 86% (91 mg); mp: 133.8-134.9 °C; <sup>1</sup>H NMR (400 MHz, CDCl<sub>3</sub>)  $\delta$ : 8.16-8.13 (m, 1H), 7.88 (d, *J* = 7.6 Hz, 1H), 7.48 (t, *J* = 7.4 Hz, 2H), 7.42-7.40 (m, 3H), 7.33-7.31 (m, 1H), 7.21-7.19 (m, 2H), 7.09 (d, *J* = 7.6 Hz, 2H), 2.33 (s, 3H), 2.16 (s, 2H), -0.04 (s, 6H); <sup>13</sup>C NMR (75 MHz, CDCl<sub>3</sub>)  $\delta$ : -3.48, 21.06, 22.56, 110.58, 120.41, 120.45, 122.71, 125.58, 126.17, 126.33, 127.20, 127.64, 128.36, 129.32, 131.71, 132.00, 134.38, 134.45, 137.57, 140.29, 140.32; HRMS (ESI, *m/z*) calcd for [C<sub>24</sub>H<sub>24</sub>NSi]<sup>+</sup>: 354.1673; found 354.1676.

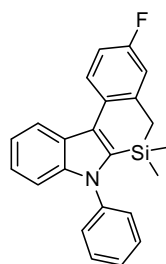

**6c**: Colorless solid, isolated yield 80% (86 mg); mp: 155.2-156.0 °C; <sup>1</sup>H NMR (400 MHz, CDCl<sub>3</sub>)  $\delta$ : 8.09 (d, *J* = 9.2 Hz, 1H), 7.92 (d, *J* = 8.4 Hz, 1H), 7.51 (t, *J* = 7.2 Hz, 2H), 7.45-7.41 (m, 3H), 7.35-7.31 (m, 1H), 7.23-7.21 (m, 2H), 6.98 (d, *J* = 8.8 Hz, 2H), 2.18 (s, 2H), -0.03 (s, 6H); <sup>13</sup>C NMR (75 MHz, CDCl<sub>3</sub>)  $\delta$ : -3.63, 22.98, 110.72, 112.14 (d, *J* = 20.4 Hz), 117.75 (d, *J* = 20.4 Hz), 120.10, 120.63, 122.93, 124.80, 125.96, 127.18, 127.32 (d, *J* = 32.1 Hz), 127.8, 129.41, 130.67 (d, *J* = 3.1 Hz), 137.21 (d, *J* = 7.4

Hz), 137.44, 140.19, 140.26, 160.24 (d,  $J = 242.3$  Hz); HRMS (ESI,  $m/z$ ) calcd for  $[C_{23}H_{21}FNSi]H^+$ : 358.1422; found 358.1429.

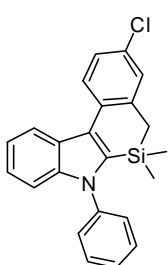

**6d:** Pale yellow solid, isolated yield 61% (68 mg); mp: 156.7-158.3 °C;  $^1H$  NMR (400 MHz,  $CDCl_3$ )  $\delta$ : 8.10-8.08 (m, 1H), 7.89 (d,  $J = 9.2$  Hz, 1H), 7.53 (t,  $J = 7.4$  Hz, 2H), 7.48-7.42 (m, 3H), 7.35-7.33 (m, 1H), 7.26-7.22 (m, 4H), 2.18 (s, 2H), -0.02 (s, 6H);  $^{13}C$  NMR (75 MHz,  $CDCl_3$ )  $\delta$ : -3.60, 22.70, 110.79, 120.15, 120.77, 123.02, 124.59, 125.68, 125.95, 127.27 (2C), 127.93, 129.45, 130.00, 130.77, 133.19, 136.67, 138.11, 140.15, 140.40; HRMS (ESI,  $m/z$ ) calcd for  $[C_{23}H_{21}ClNSi]H^+$ : 374.1126; found 374.1121.

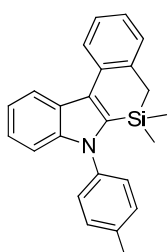

**6e:** Colorless solid, isolated yield 88% (93 mg); mp: 165.8-167.0 °C;  $^1H$  NMR (400 MHz,  $CDCl_3$ )  $\delta$ : 8.18 (d,  $J = 8.8$  Hz, 1H), 8.01 (d,  $J = 8.4$  Hz, 1H), 7.34-7.27 (m, 7H), 7.23 (t,  $J = 5.4$  Hz, 2H), 7.11 (t,  $J = 7.4$  Hz, 1H), 2.46 (s, 3H), 2.23 (s, 2H), 0.03 (s, 6H);  $^{13}C$  NMR (75 MHz,  $CDCl_3$ )  $\delta$ : -3.47, 21.19, 22.67, 110.71, 120.39, 120.43, 122.68, 124.93, 125.24, 125.68, 126.06, 126.26, 127.04, 129.92, 131.08, 134.50, 134.71, 137.63 (2C), 138.19, 140.49; HRMS (ESI,  $m/z$ ) calcd for  $[C_{24}H_{23}NSi]H^+$ : 354.1673; found 354.1675.

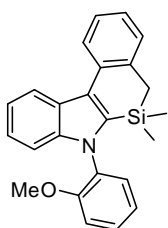

**6f:** Pale yellow solid, isolated yield 85% (94 mg); mp: 118.2-119.1 °C;  $^1H$  NMR (400 MHz,  $CDCl_3$ )  $\delta$ : 8.16 (d,  $J = 6.8$  Hz, 1H), 8.02 (d,  $J = 7.6$  Hz, 1H), 7.40 (t,  $J = 8.0$  Hz, 1H), 7.30-7.22 (m, 3H), 7.20-7.17 (m, 2H), 7.08-7.01 (m, 4H), 3.66 (s, 3H), 2.25-2.16 (m, 2H), -0.04 (s, 3H), -0.13 (s, 3H);  $^{13}C$  NMR (75 MHz,  $CDCl_3$ )  $\delta$ : -4.56, -3.56, 22.66, 55.42, 110.98, 111.89, 120.22, 120.33, 120.60, 122.45, 124.74, 124.91, 125.61, 125.79, 126.15, 128.54, 129.64, 129.94, 131.09, 134.54, 134.88, 138.77, 140.83, 155.80; HRMS (ESI,  $m/z$ ) calcd for  $[C_{24}H_{23}NOSi]H^+$ : 370.1622; found 370.1623.

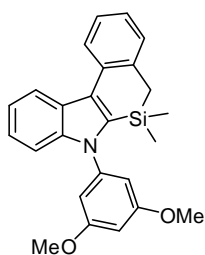

**6g:** Yellow oil, isolated yield 87% (104 mg);  $^1H$  NMR (400 MHz,  $CDCl_3$ )  $\delta$ : 8.15 (d,  $J = 8.8$  Hz, 1H), 7.97 (d,  $J = 7.6$  Hz, 1H), 7.45-7.42 (m, 1H), 7.29-7.20 (m, 4H), 7.08 (d,  $J = 7.4$  Hz, 1H), 6.61 (s, 2H), 6.54 (s, 1H), 3.79 (s, 6H), 2.21 (s, 2H), 0.06 (s, 6H);  $^{13}C$  NMR (75 MHz,  $CDCl_3$ )  $\delta$ : -3.49, 22.75, 55.53, 99.91, 105.44 (2C), 110.86, 120.43, 120.59, 122.85, 125.07, 125.58, 125.70, 126.21, 126.32, 131.07, 134.56,



137.80, 140.08, 141.92, 161.21; HRMS (ESI,  $m/z$ ) calcd for  $[C_{25}H_{25}NO_2Si]H^+$ : 400.1727; found 400.1728.

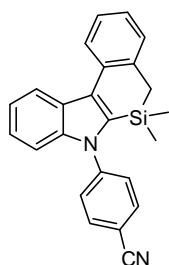

**6h**: Colorless solid, isolated yield 71% (78 mg); mp: 238.9-239.6 °C;  $^1H$  NMR (400 MHz,  $CDCl_3$ )  $\delta$ : 8.17-8.14 (m, 1H), 7.94 (d,  $J$  = 7.6 Hz, 1H), 7.83 (d,  $J$  = 8.8 Hz, 2H), 7.57 (d,  $J$  = 8.4 Hz, 2H), 7.39-7.35 (m, 1H), 7.32-7.25 (m, 4H), 7.14 (t,  $J$  = 7.4 Hz, 1H), 2.21 (s, 2H), 0.02 (s, 6H);  $^{13}C$  NMR (75 MHz,  $CDCl_3$ )  $\delta$ : -3.36, 22.42, 110.13, 110.92, 118.17, 120.71, 121.32, 123.51, 125.59, 125.83, 126.48, 126.75, 127.38, 127.44, 131.08, 133.43, 133.91, 134.41, 137.14, 139.65, 144.33; HRMS (ESI,  $m/z$ ) calcd for  $[C_{24}H_{20}N_2Si]H^+$ : 365.1469; found 365.1469.

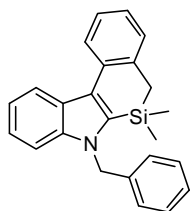

**6i**: Pale yellow solid, isolated yield 64% (68 mg); mp: 109.4-110.6 °C;  $^1H$  NMR (400 MHz,  $CDCl_3$ )  $\delta$ : 8.19-8.16 (m, 1H), 8.02 (d,  $J$  = 7.6 Hz, 1H), 7.27-7.16 (m, 8H), 7.05 (t,  $J$  = 7.4 Hz, 1H), 6.92 (d,  $J$  = 6.4 Hz, 1H), 5.41 (s, 2H), 2.23 (s, 2H), 0.11 (s, 6H);  $^{13}C$  NMR (75 MHz,  $CDCl_3$ )  $\delta$ : -3.25, 22.45, 49.74, 109.96, 120.13, 120.77, 122.59, 124.66, 124.77, 125.71, 125.87, 126.09, 126.13, 127.33, 128.67, 131.08, 134.03, 134.73, 137.65, 138.01, 140.10; HRMS (ESI,  $m/z$ ) calcd for  $[C_{24}H_{24}NSi]H^+$ : 354.1673; found 354.1671.

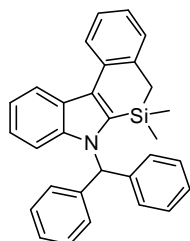

**6j**: Pale yellow solid, isolated yield 94% (121 mg); mp: 129.7-130.1 °C;  $^1H$  NMR (400 MHz,  $CDCl_3$ )  $\delta$ : 8.14 (d,  $J$  = 8.0 Hz, 1H), 8.00 (d,  $J$  = 7.2 Hz, 1H), 7.31-7.23 (m, 8H), 7.17 (t,  $J$  = 3.8 Hz, 4H), 7.10-7.04 (m, 2H), 7.00 (s, 1H), 6.90 (t,  $J$  = 7.6 Hz, 1H), 6.72 (d,  $J$  = 8.8 Hz, 1H), 2.27 (s, 2H), 0.17 (s, 6H);  $^{13}C$  NMR (75 MHz,  $CDCl_3$ )  $\delta$ : -2.81, 22.58, 66.57, 113.26, 119.83, 120.72, 122.08, 124.82, 124.88, 125.65, 126.32, 127.41, 127.73, 128.14, 128.56, 130.99, 134.01, 134.65, 139.17, 139.21, 139.51; HRMS (ESI,  $m/z$ ) calcd for  $[C_{30}H_{28}NSi]H^+$ : 430.1986; found 430.1988.

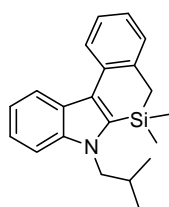

**6k**: Pale yellow oil, isolated yield 51% (49 mg);  $^1H$  NMR (400 MHz,  $CDCl_3$ )  $\delta$ : 8.12 (d,  $J$  = 8.0 Hz, 1H), 7.95 (d,  $J$  = 8.0 Hz, 1H), 7.37 (d,  $J$  = 8.4 Hz, 1H), 7.25-7.21 (m, 3H), 7.16 (t,  $J$  = 7.6 Hz, 1H), 7.06 (t,  $J$  = 7.4 Hz, 1H), 4.01 (d,  $J$  = 7.6 Hz, 2H), 2.28-2.17 (m, 3H), 0.93 (d,  $J$  = 6.4 Hz, 6H), 0.36 (s, 6H);  $^{13}C$  NMR (75 MHz,  $CDCl_3$ )  $\delta$ : -2.75, 20.41, 22.64, 30.30, 53.97, 110.23, 119.76, 120.56, 122.15, 124.14, 124.67, 125.67, 125.98, 126.25,



130.88, 134.12, 134.85, 137.14, 139.90; HRMS (ESI,  $m/z$ ) calcd for  $[C_{21}H_{26}NSi]H^+$ : 320.1829; found 320.1831.

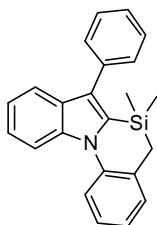

**8a:** Yellow solid, isolated yield 57% (58 mg); mp: 129.1-130.2 °C;  $^1H$  NMR (400 MHz,  $CDCl_3$ )  $\delta$ : 7.88 (d,  $J$  = 8.4 Hz, 1H), 7.78 (d,  $J$  = 7.6 Hz, 1H), 7.75 (d,  $J$  = 8.0 Hz, 1H), 7.54 (d,  $J$  = 6.8 Hz, 2H), 7.44 (t,  $J$  = 7.6 Hz, 2H), 7.35 (t,  $J$  = 7.4 Hz, 1H), 7.30-7.26 (m, 3H), 7.17 (t,  $J$  = 7.0 Hz, 1H), 7.12 (t,  $J$  = 7.4 Hz, 1H), 2.13 (s, 2H), 0.04 (s, 6H);  $^{13}C$  NMR (75 MHz,  $CDCl_3$ )  $\delta$ : -3.37, 20.36, 111.76, 119.84, 120.60, 121.52, 123.16, 124.83, 125.98, 126.81, 128.34, 128.53, 128.67, 129.76, 130.44, 131.56, 134.95, 136.01, 137.67, 137.83; HRMS (ESI,  $m/z$ ) calcd for  $[C_{23}H_{22}NSi]H^+$ : 340.1516; found 340.1519.

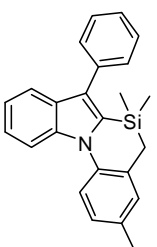

**8b:** Pale yellow oil, isolated yield 84% (89 mg);  $^1H$  NMR (400 MHz,  $CDCl_3$ )  $\delta$ : 7.86 (d,  $J$  = 8.4 Hz, 1H), 7.78 (d,  $J$  = 7.6 Hz, 1H), 7.63 (d,  $J$  = 8.0 Hz, 1H), 7.54 (d,  $J$  = 7.6 Hz, 2H), 7.44 (t,  $J$  = 7.6 Hz, 2H), 7.36 (d,  $J$  = 7.6 Hz, 1H), 7.28 (t,  $J$  = 7.0 Hz, 1H), 7.16 (t,  $J$  = 7.4 Hz, 1H), 7.11 (s, 1H), 7.08 (d,  $J$  = 8.0 Hz, 1H), 2.36 (s, 3H), 2.09 (s, 2H), 0.04 (s, 6H);  $^{13}C$  NMR (75 MHz,  $CDCl_3$ )  $\delta$ : -3.33, 20.26, 20.89, 111.73, 119.79, 120.42, 121.35, 123.05, 126.52, 126.75, 128.25, 128.32, 128.51, 129.78, 130.17, 132.21, 134.35, 135.01, 135.39, 136.11, 137.65; HRMS (ESI,  $m/z$ ) calcd for  $[C_{24}H_{24}NSi]H^+$ : 354.1673; found 354.1675.

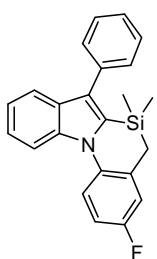

**8c:** Yellow solid, isolated yield 68% (73 mg); mp: 135.6-136.2 °C;  $^1H$  NMR (400 MHz,  $CDCl_3$ )  $\delta$ : 7.82-7.77 (m, 2H), 7.70-7.67 (m, 1H), 7.53 (d,  $J$  = 8.0 Hz, 2H), 7.45 (t,  $J$  = 7.6 Hz, 2H), 7.37 (d,  $J$  = 7.6 Hz, 1H), 7.29 (t,  $J$  = 7.6 Hz, 1H), 7.22-7.16 (m, 1H), 7.03-6.95 (m, 2H), 2.12 (s, 2H), 0.05 (s, 6H);  $^{13}C$  NMR (75 MHz,  $CDCl_3$ )  $\delta$ : -3.45, 20.76, 111.35, 112.44 (d,  $J$  = 21.6 Hz), 117.87 (d,  $J$  = 21.6 Hz), 119.94, 120.66, 122.67 (d,  $J$  = 8.7 Hz), 123.32, 126.90, 128.38, 128.49, 128.67, 129.71, 133.12 (d,  $J$  = 8.0 Hz), 133.92 (d,  $J$  = 2.5 Hz), 134.60, 135.85, 137.66, 159.46 (d,  $J$  = 242.3 Hz); HRMS (ESI,  $m/z$ ) calcd for  $[C_{24}H_{24}FNSi]H^+$ : 358.1422; found 358.1427.

## 5) X-ray Crystallographic Studies of 6e and 8a

The single crystals of **6e** suitable for X-ray analysis were grown in mixed solvent of hexane, diethyl ether and ethyl acetate. Data collections for **6e** were performed at 20 °C on a Rigaku RAXIS RAPID IP diffractometer, using graphite-monochromated Mo K $\alpha$  radiation ( $\lambda = 0.71073$  Å). The determination of crystal class and unit cell parameters was carried out by the Rapid-AUTO (Rigaku 2000) program package for **6e**. The raw frame data were processed using Crystal Structure (Rigaku/MSK 2000) for **6e** to yield the reflection data file. The structure of **6e** was solved by use of SHELXTL program. Refinement was performed on F<sup>2</sup> anisotropically for all the non-hydrogen atoms by the full-matrix least-squares method. The hydrogen atoms were placed at the calculated positions and were included in the structure calculation without further refinement of the parameters. Crystal data, data collection and processing parameters for compounds **6e** are summarized in **STable 2**. Crystallographic data (excluding structure factors) have been deposited with the Cambridge Crystallographic Data Centre as supplementary publication nos. CCDC-823538 (**6e**). Copies of these data can be obtained free of charge from the Cambridge Crystallographic Data Centre via [www.ccdc.cam.ac.uk/data\\_request/cif](http://www.ccdc.cam.ac.uk/data_request/cif).

**STable 2.** Crystal data and structure refinement for **6e**.<sup>6</sup>

|                                   |                                             |                           |
|-----------------------------------|---------------------------------------------|---------------------------|
| Identification code               | a                                           |                           |
| Empirical formula                 | C <sub>24</sub> H <sub>23</sub> N Si        |                           |
| Formula weight                    | 353.52                                      |                           |
| Temperature                       | 298(2) K                                    |                           |
| Wavelength                        | 0.71073 Å                                   |                           |
| Crystal system                    | Triclinic                                   |                           |
| Space group                       | P-1                                         |                           |
| Unit cell dimensions              | a = 9.3619(19) Å                            | $\alpha = 87.11(3)^\circ$ |
|                                   | b = 10.083(2) Å                             | $\beta = 82.02(3)^\circ$  |
|                                   | c = 10.655(2) Å                             | $\gamma = 88.24(3)^\circ$ |
| Volume                            | 994.5(3) Å <sup>3</sup>                     |                           |
| Z                                 | 2                                           |                           |
| Density (calculated)              | 1.181 Mg/m <sup>3</sup>                     |                           |
| Absorption coefficient            | 0.125 mm <sup>-1</sup>                      |                           |
| F(000)                            | 376                                         |                           |
| Crystal size                      | 0.30 x 0.30 x 0.20 mm <sup>3</sup>          |                           |
| Theta range for data collection   | 2.72 to 27.48°                              |                           |
| Index ranges                      | -12 ≤ h ≤ 12, -13 ≤ k ≤ 13, -13 ≤ l ≤ 13    |                           |
| Reflections collected             | 6104                                        |                           |
| Independent reflections           | 4195 [R(int) = 0.1614]                      |                           |
| Completeness to theta = 27.48°    | 92.0 %                                      |                           |
| Absorption correction             | Empirical                                   |                           |
| Max. and min. transmission        | 0.9755 and 0.9636                           |                           |
| Refinement method                 | Full-matrix least-squares on F <sup>2</sup> |                           |
| Data / restraints / parameters    | 4195 / 0 / 239                              |                           |
| Goodness-of-fit on F <sup>2</sup> | 0.996                                       |                           |

Final R indices [ $I > 2\sigma(I)$ ]  
R indices (all data)  
Extinction coefficient  
Largest diff. peak and hole

$R1 = 0.0664$ ,  $wR2 = 0.1178$   
 $R1 = 0.1855$ ,  $wR2 = 0.1398$   
 $0.043(3)$   
 $0.303$  and  $-0.336 \text{ e}^{-3}$

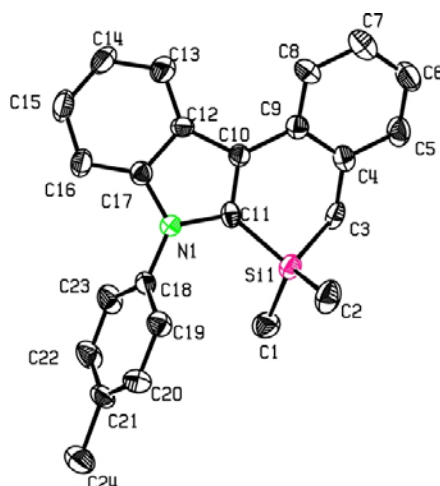

**Figure 1.** ORTEP drawing of **6e** with 30% probability thermal ellipsoids. Hydrogen atoms have been omitted for clarity.

The single crystals of **8a** suitable for X-ray analysis were grown in mixed solvent of hexane, diethyl ether and ethyl acetate. Data collections for **8a** were performed at 20 °C on a Rigaku RAXIS RAPID IP diffractometer, using graphite-monochromated Mo K $\alpha$  radiation ( $\lambda = 0.71073 \text{ \AA}$ ). The determination of crystal class and unit cell parameters was carried out by the Rapid-AUTO (Rigaku 2000) program package for **8a**. The raw frame data were processed using Crystal Structure (Rigaku/MSK 2000) for **8a** to yield the reflection data file. The structures of **8a** were solved by use of SHELXTL program. Refinement was performed on F<sup>2</sup> anisotropically for all the non-hydrogen atoms by the full-matrix least-squares method. The hydrogen atoms were placed at the calculated positions and were included in the structure calculation without further refinement of the parameters. Crystal data, data collection and processing parameters for compounds **8a** are summarized in **Table 3**. Crystallographic data (excluding structure factors) have been deposited with the Cambridge Crystallographic Data Centre as supplementary publication nos. CCDC-824123 (**8a**). Copies of these data can be obtained free of charge from the Cambridge Crystallographic Data Centre via [www.ccdc.cam.ac.uk/data\\_request/cif](http://www.ccdc.cam.ac.uk/data_request/cif).

**Table 3.** Crystal data and structure refinement for **8a**.<sup>6</sup>

|                                   |                                             |                |
|-----------------------------------|---------------------------------------------|----------------|
| Identification code               | ly                                          |                |
| Empirical formula                 | C <sub>23</sub> H <sub>21</sub> N Si        |                |
| Formula weight                    | 339.50                                      |                |
| Temperature                       | 293(2) K                                    |                |
| Wavelength                        | 0.71073 Å                                   |                |
| Crystal system                    | Monoclinic                                  |                |
| Space group                       | P2(1)/n                                     |                |
| Unit cell dimensions              | a = 13.268(3) Å                             | α = 90°        |
|                                   | b = 10.072(2) Å                             | β = 91.60(3) ° |
|                                   | c = 13.822(3) Å                             | γ = 90°        |
| Volume                            | 1846.4(6) Å <sup>3</sup>                    |                |
| Z                                 | 4                                           |                |
| Density (calculated)              | 1.221 Mg/m <sup>3</sup>                     |                |
| Absorption coefficient            | 0.132 mm <sup>-1</sup>                      |                |
| F(000)                            | 720                                         |                |
| Crystal size                      | 0.30 x 0.30 x 0.20 mm <sup>3</sup>          |                |
| Theta range for data collection   | 2.10 to 27.48°                              |                |
| Index ranges                      | -17 ≤ h ≤ 17, -12 ≤ k ≤ 13, -17 ≤ l ≤ 17    |                |
| Reflections collected             | 7929                                        |                |
| Independent reflections           | 4229 [R(int) = 0.0480]                      |                |
| Completeness to theta = 27.48°    | 99.9 %                                      |                |
| Absorption correction             | Empirical                                   |                |
| Max. and min. transmission        | 0.9742 and 0.9616                           |                |
| Refinement method                 | Full-matrix least-squares on F <sup>2</sup> |                |
| Data / restraints / parameters    | 4229 / 0 / 229                              |                |
| Goodness-of-fit on F <sup>2</sup> | 1.004                                       |                |
| Final R indices [I > 2σ(I)]       | R1 = 0.0484, wR2 = 0.0865                   |                |
| R indices (all data)              | R1 = 0.0965, wR2 = 0.0899                   |                |
| Extinction coefficient            | 0.0276(10)                                  |                |
| Largest diff. peak and hole       | 0.274 and -0.202 e. Å <sup>-3</sup>         |                |

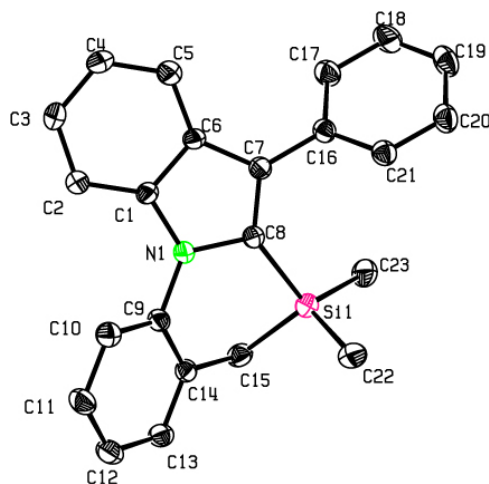

**Figure 2.** ORTEP drawing of **8a** with 30% probability thermal ellipsoids. Hydrogen atoms have been omitted for clarity.

**References:**

1. G. P. M. van Klink, H. J. R. de Boer, G. Schat, O. S. Akkerman, F. Bickelhaupt and A. L. Spek, *Organometallics*, 2002, **21**, 2119.
2. K. Sonogashira, Y. Tohda and N. Hagihara, *Tetrahedron Lett.*, 1975, **44**, 4467.
3. H.-J. Zhang, Z. Song, C. Wang, C. Bruneau and Z. Xi, *Tetrahedron Lett.*, 2008, **49**, 624.
4. a) M. C. Willis, G. N. Brace and I. P. Holmes, *Angew. Chem., Int. Ed.*, 2005, **44**, 403.  
b) M. C. Willis, G. N. Brace, T. J. K. Findlay and I. P. Holmes, *Adv. Synth. Catal.*, 2006, **348**, 851. c) A. J. Fletcher, M. N. Bax and M. C. Willis, *Chem. Commun.*, 2007, 4764.
5. Z. Gan, K. Kawamura, K. Eda and M. Hayashi, *J. Organomet. Chem.*, 2010, **695**, 2022.
6. G. M. Sheldrick, SHELXTL 5.10 for Windows NT: *Structure Determination Software Programs*; Bruker Analytical X-ray Systems, Inc.: Madison, WI, **1997**.

6) Scanned <sup>1</sup>H NMR and <sup>13</sup>C NMR Spectra of All New Compounds

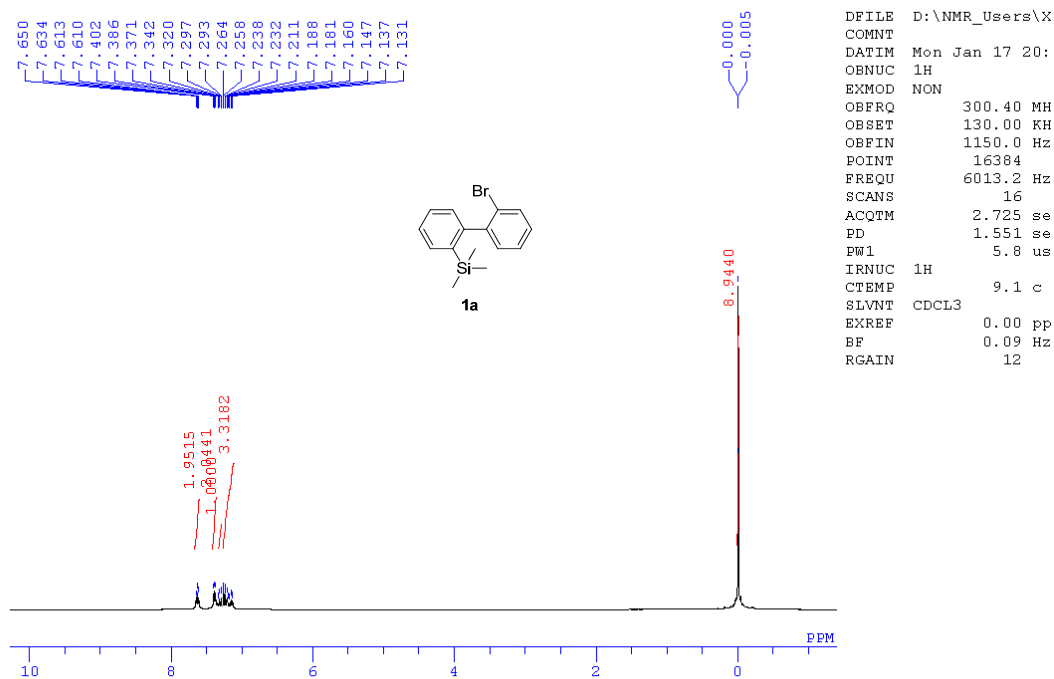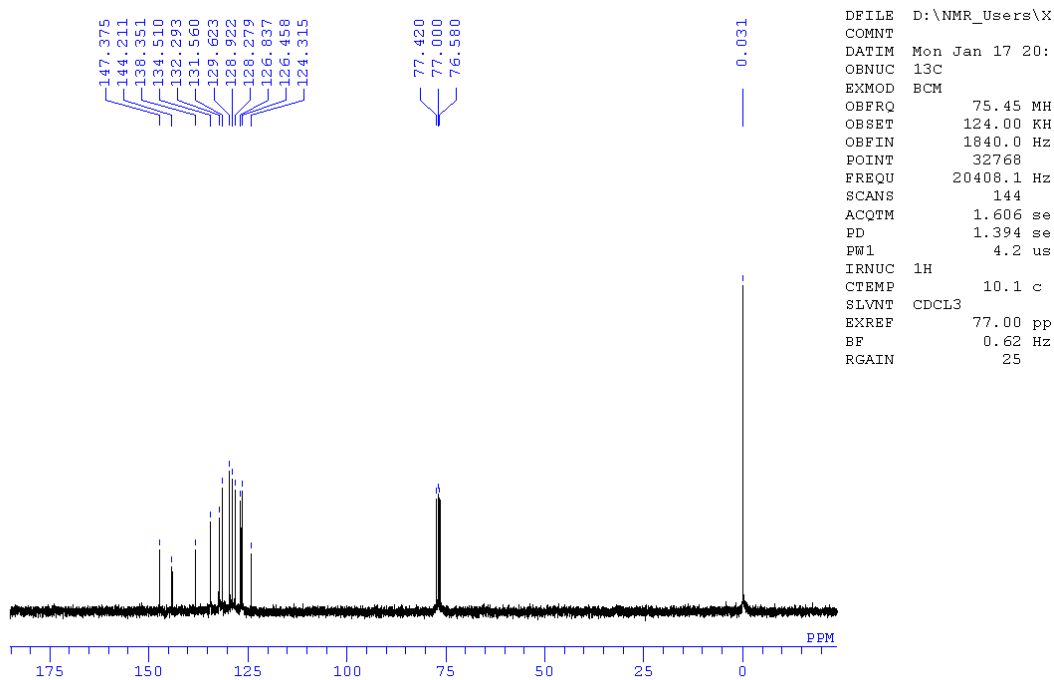

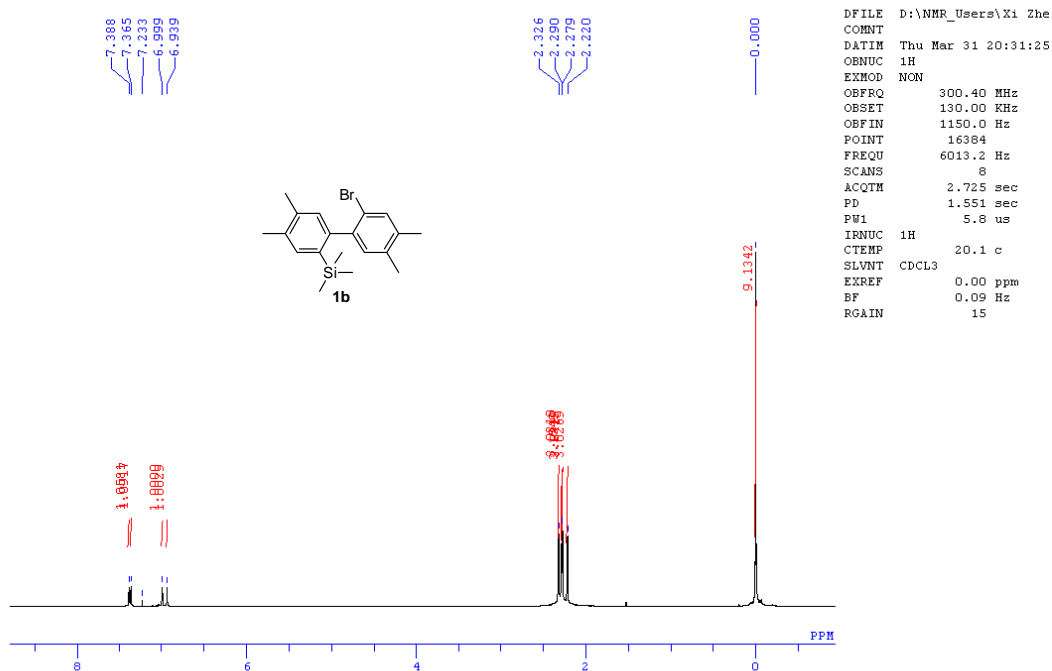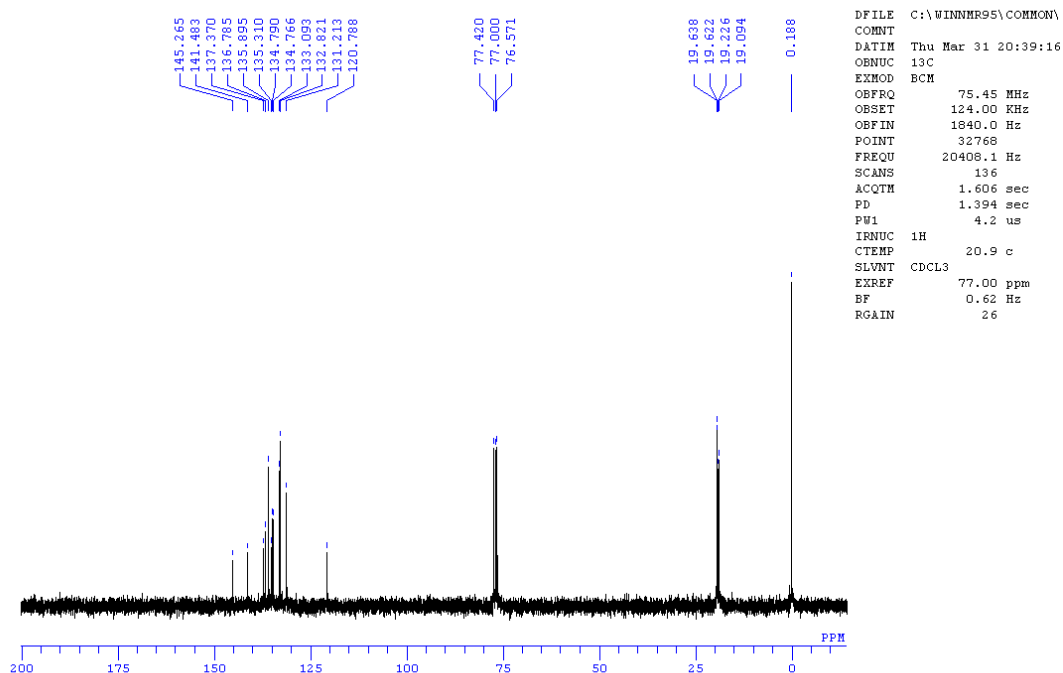

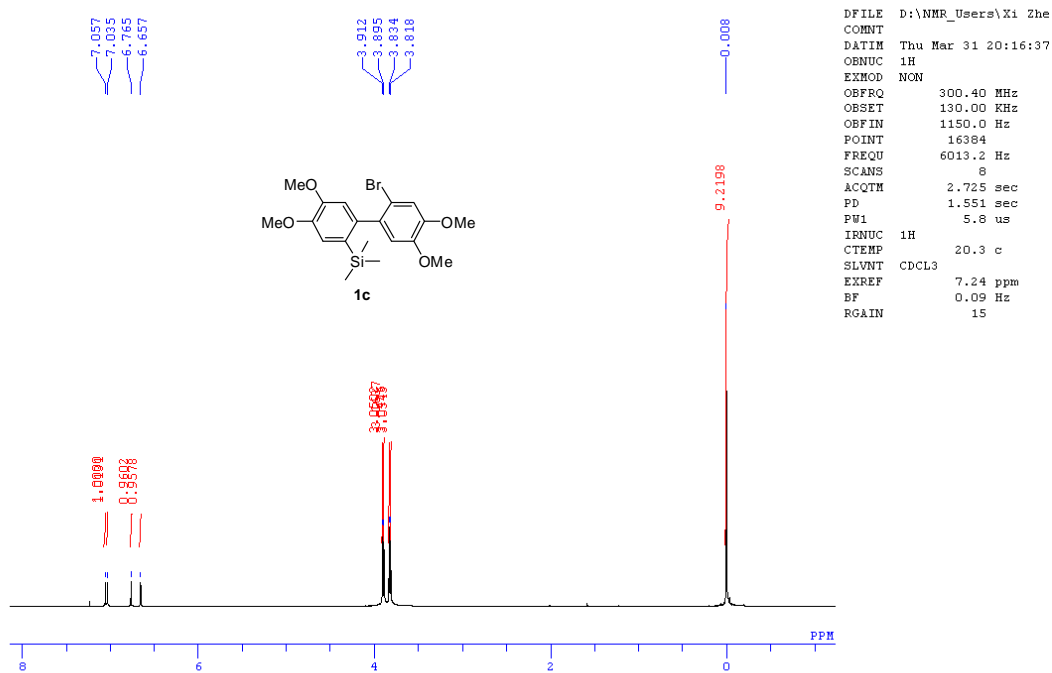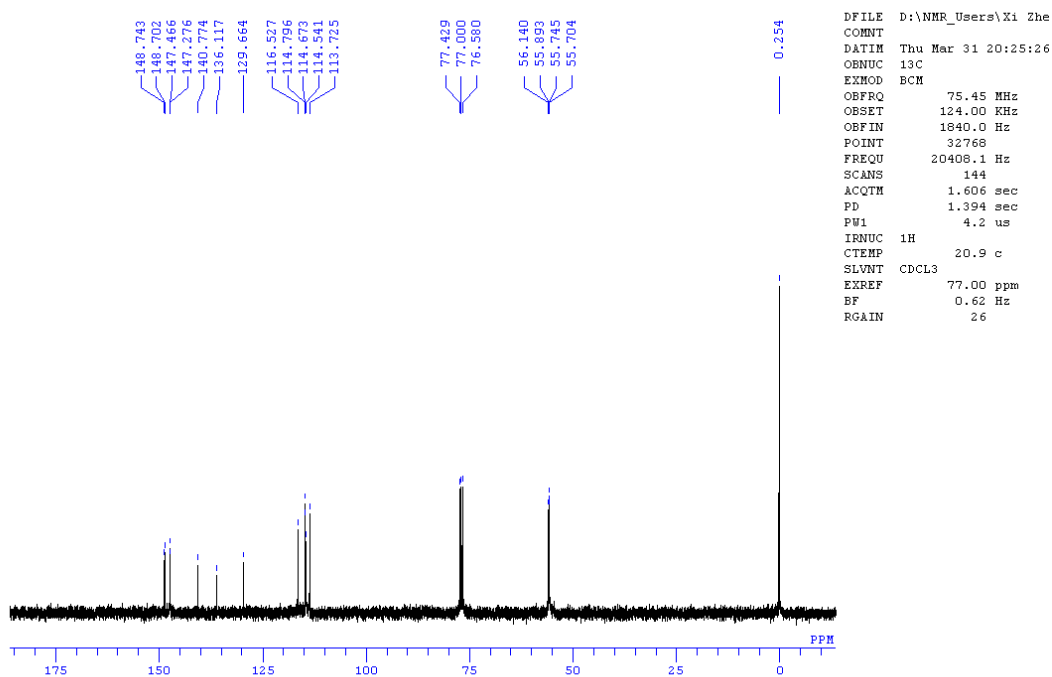



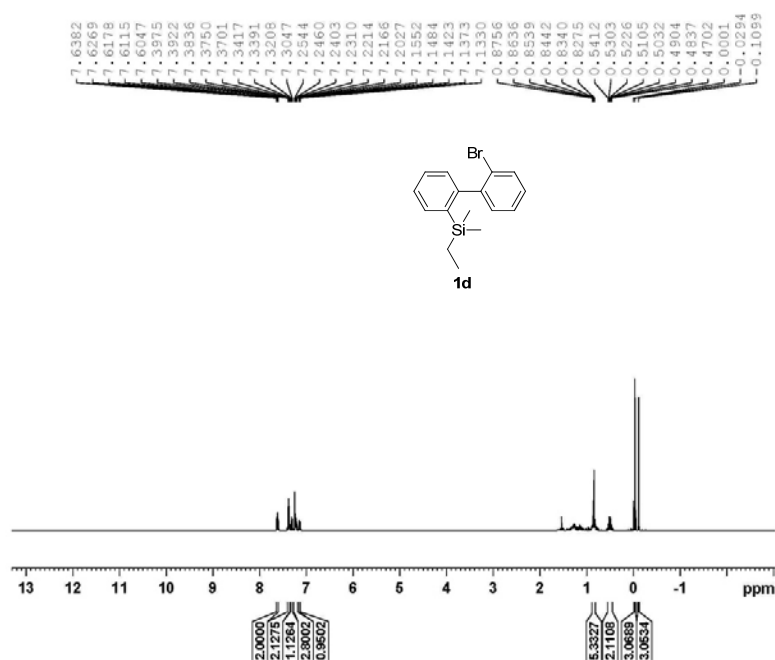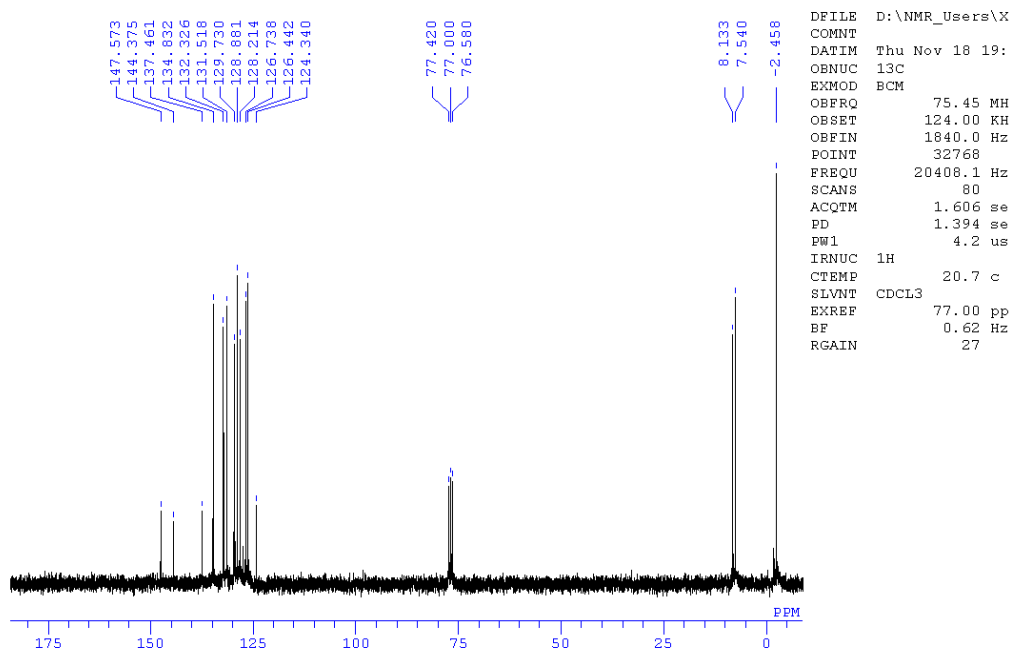

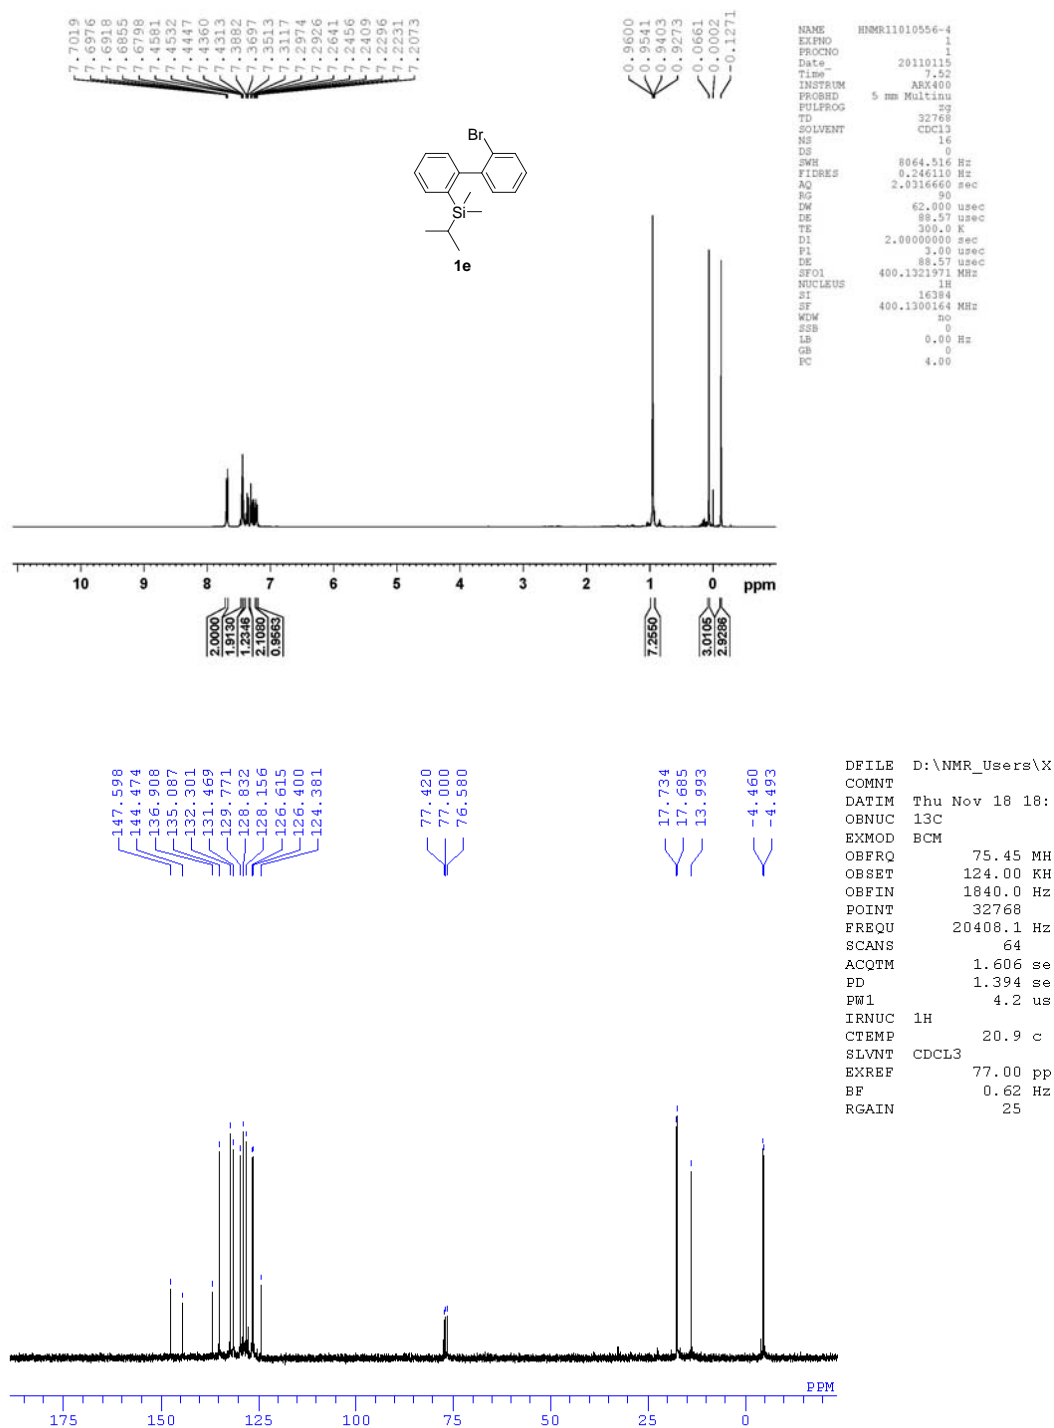

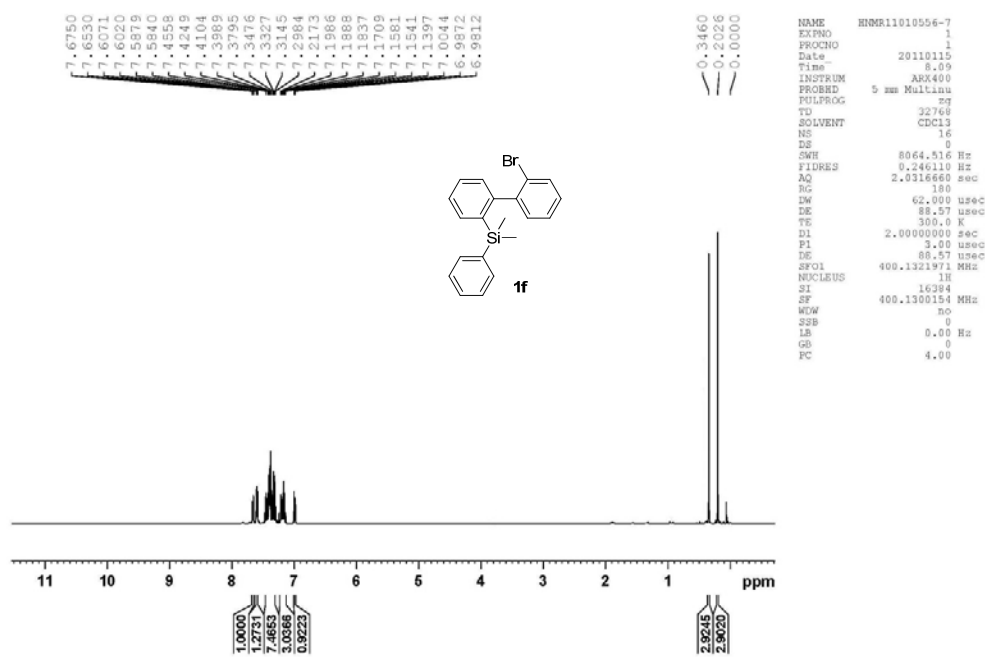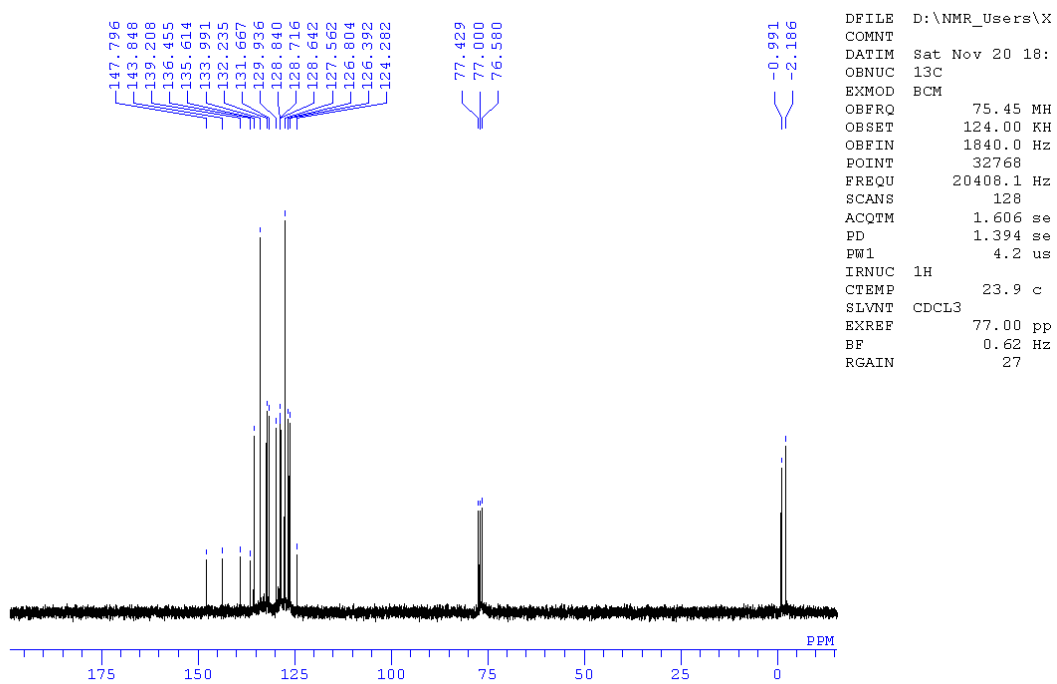

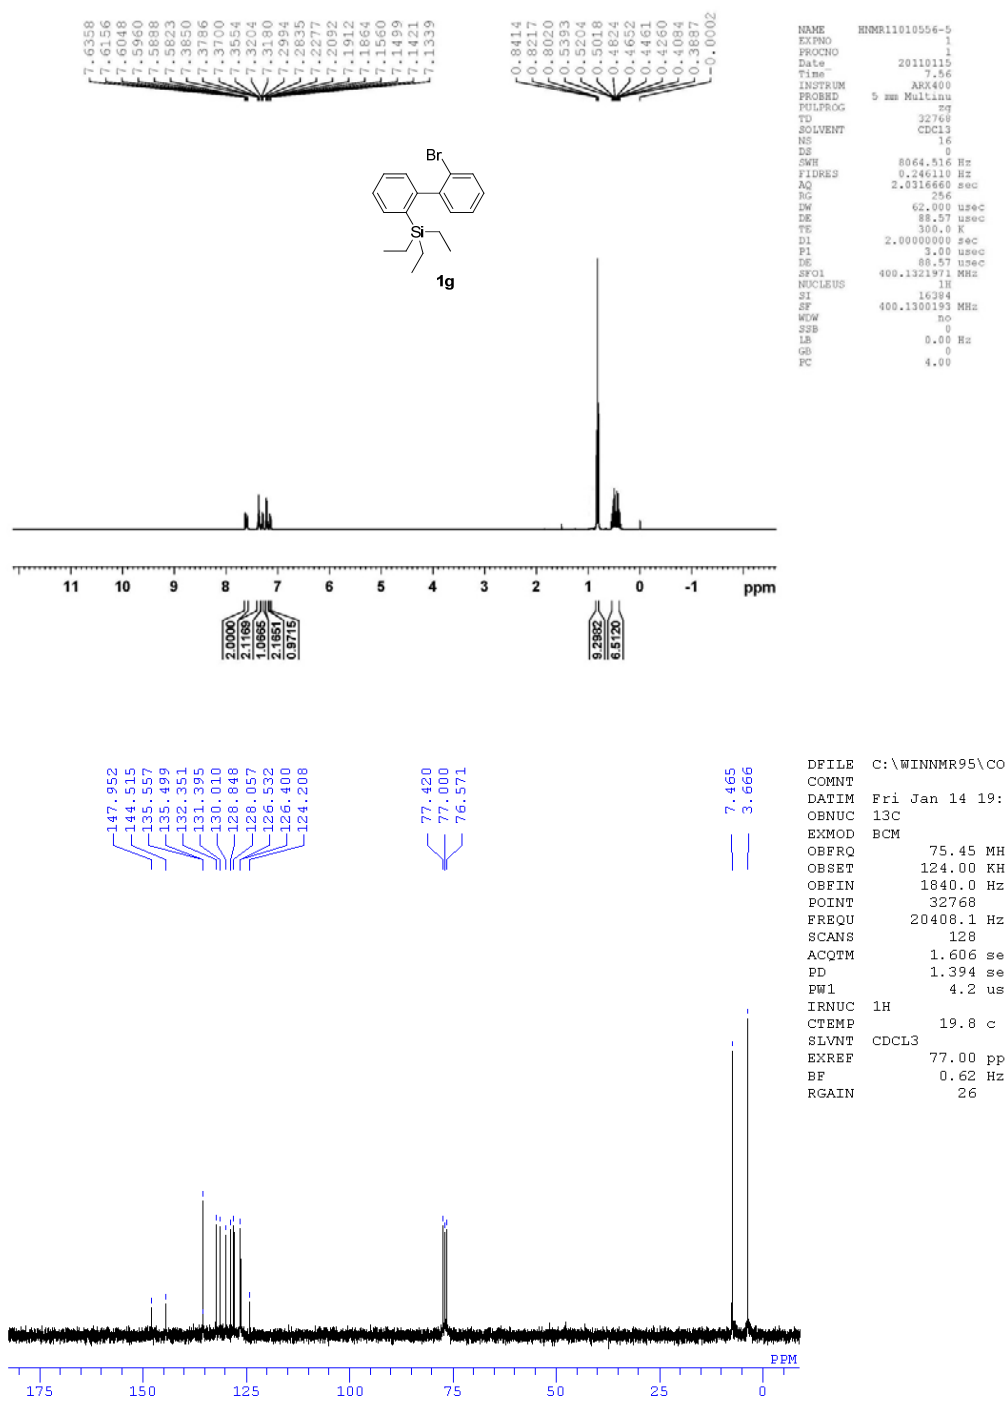

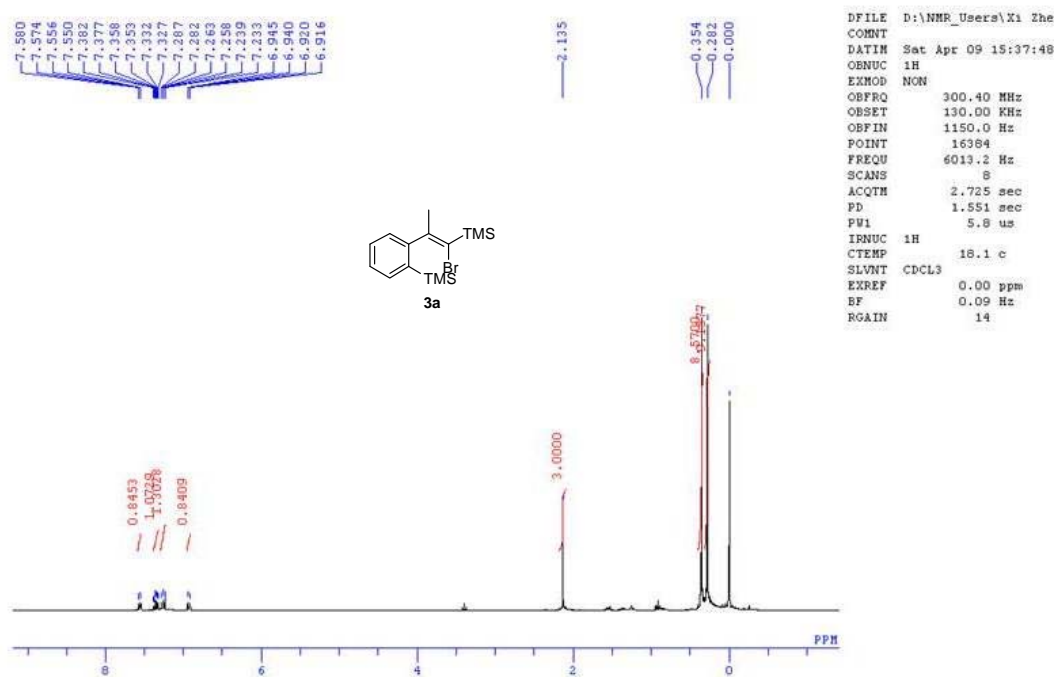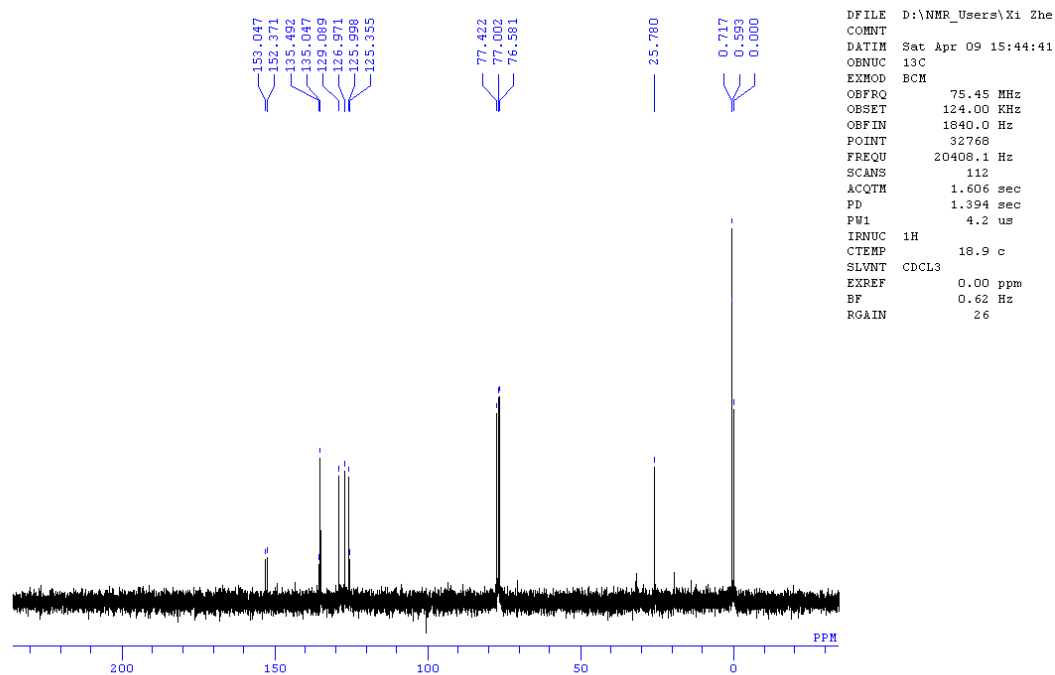

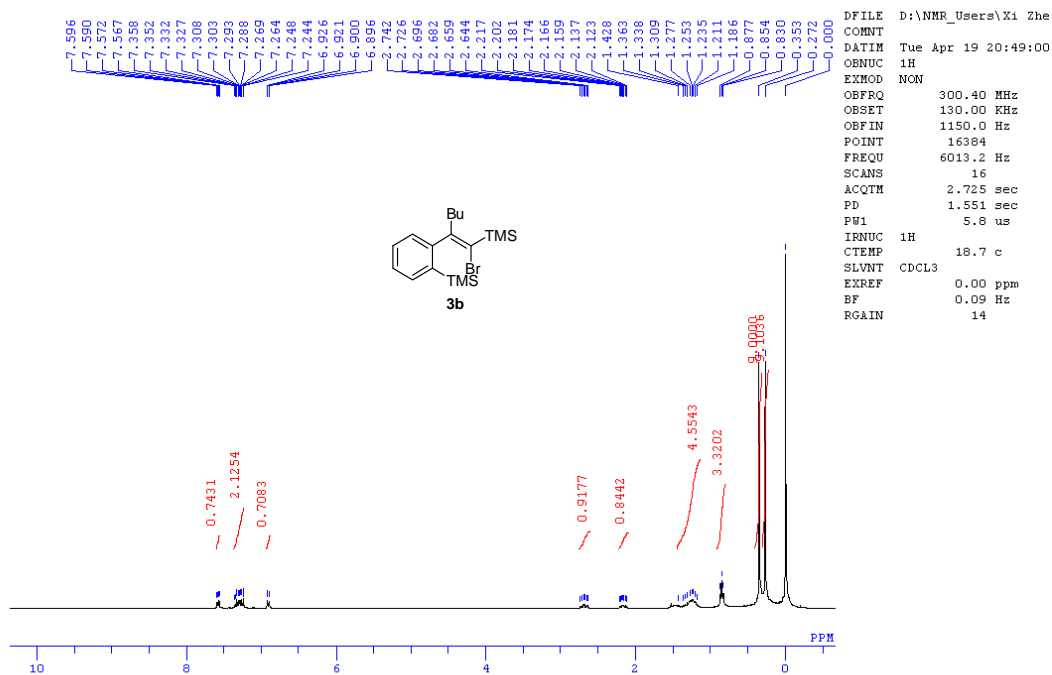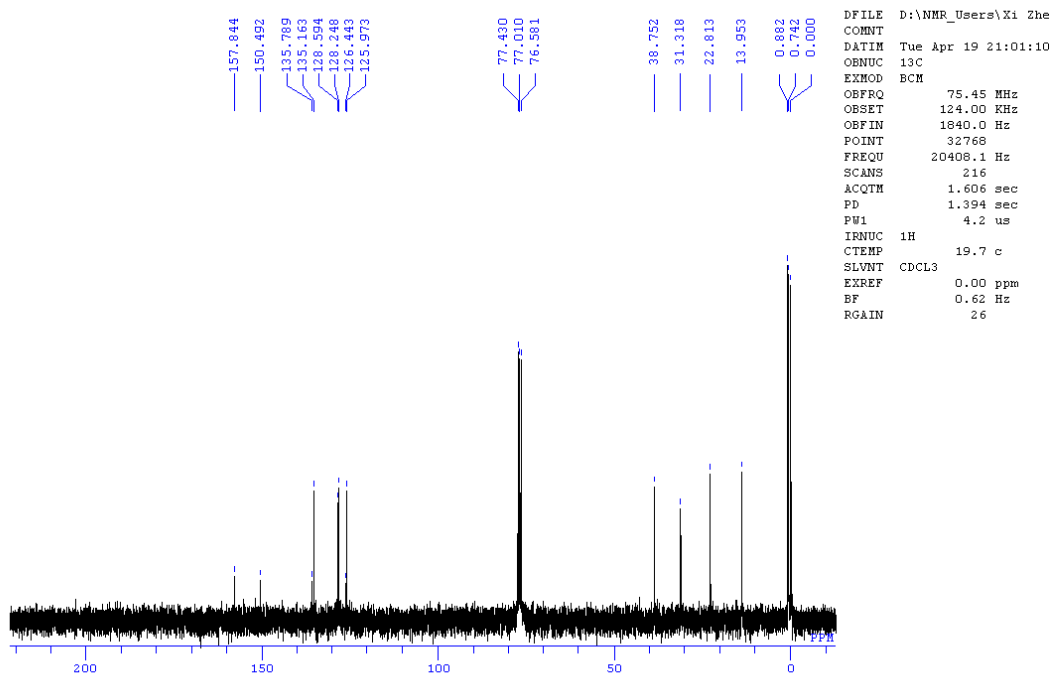

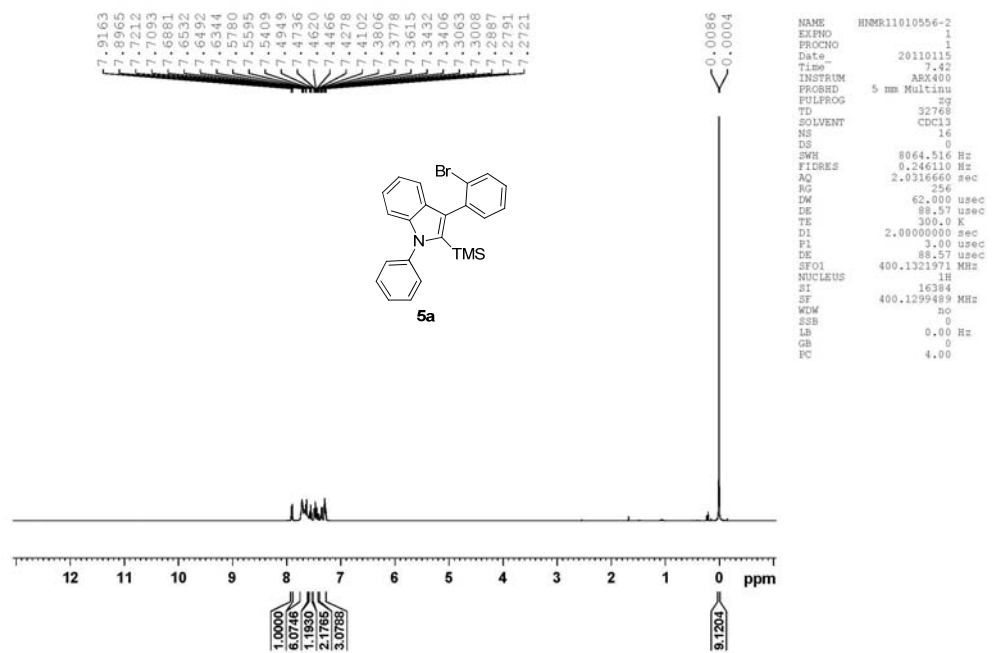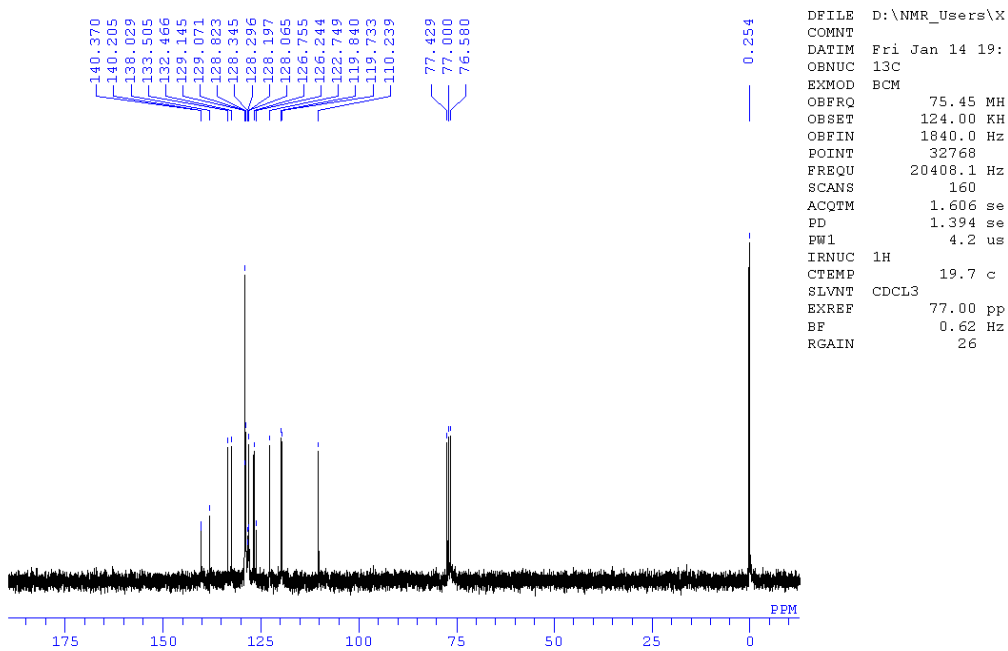

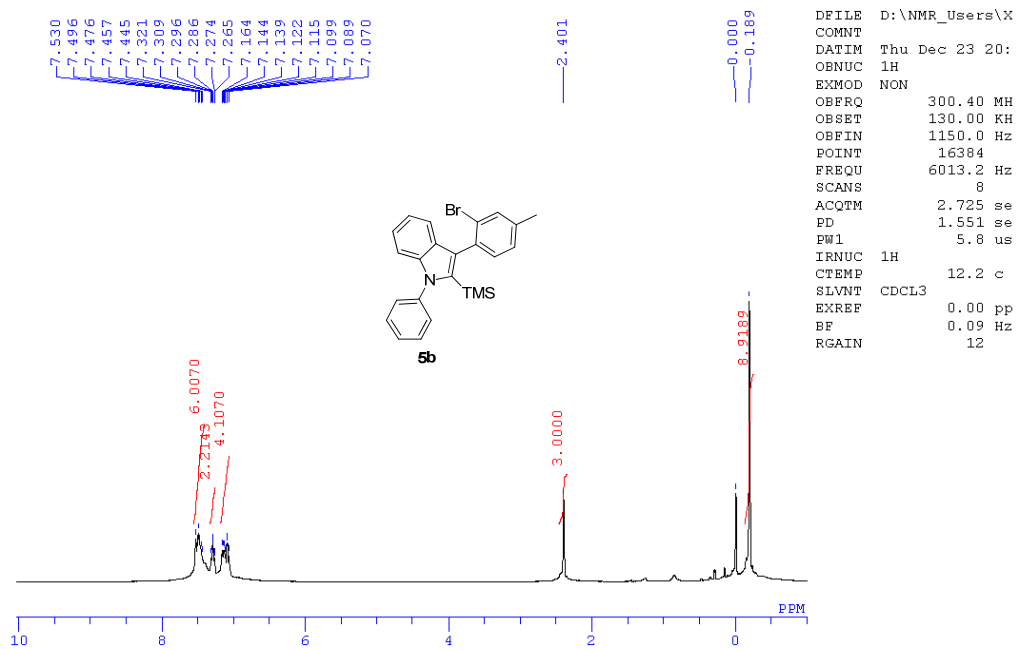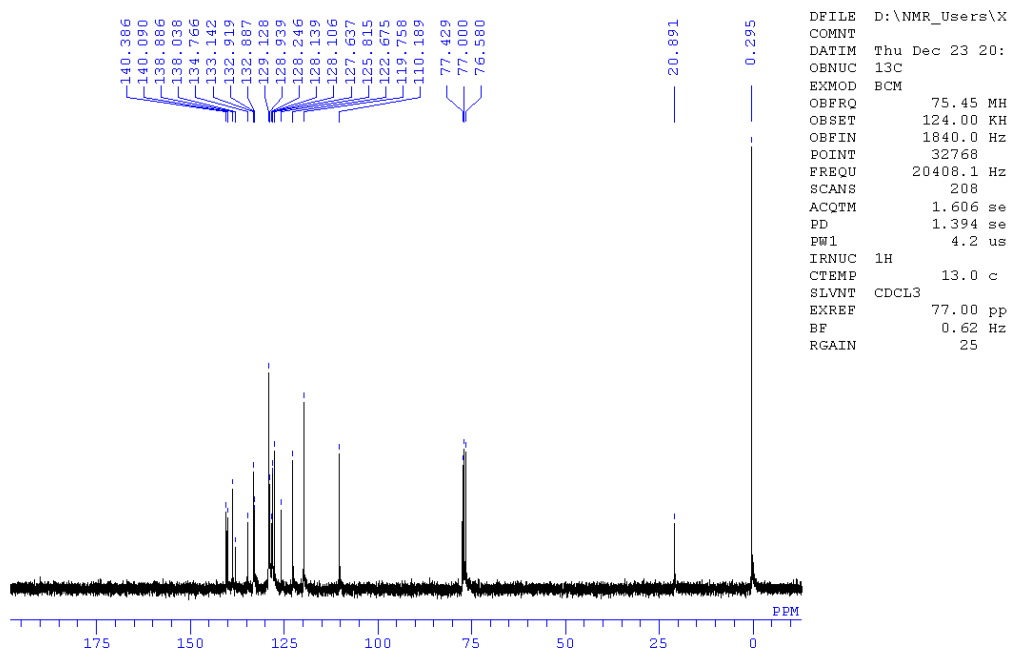



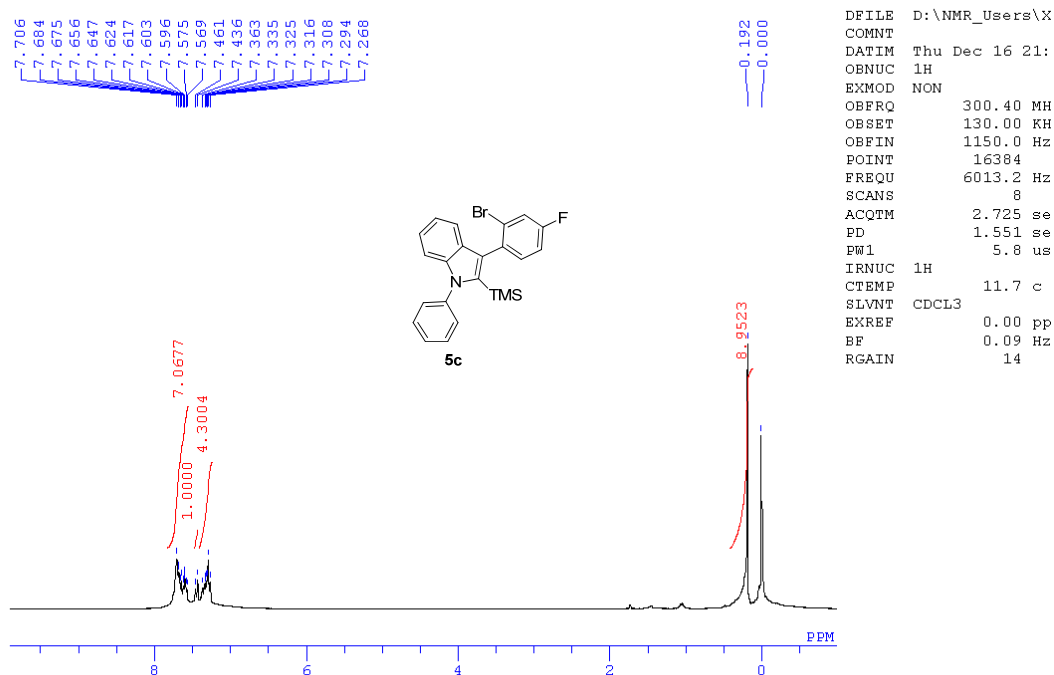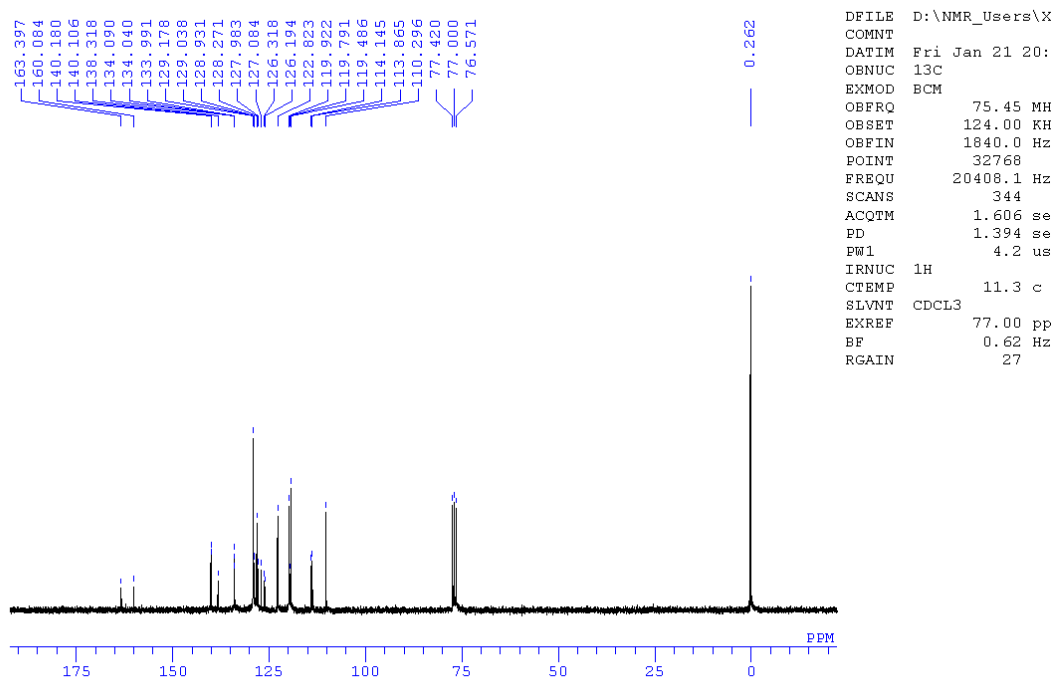

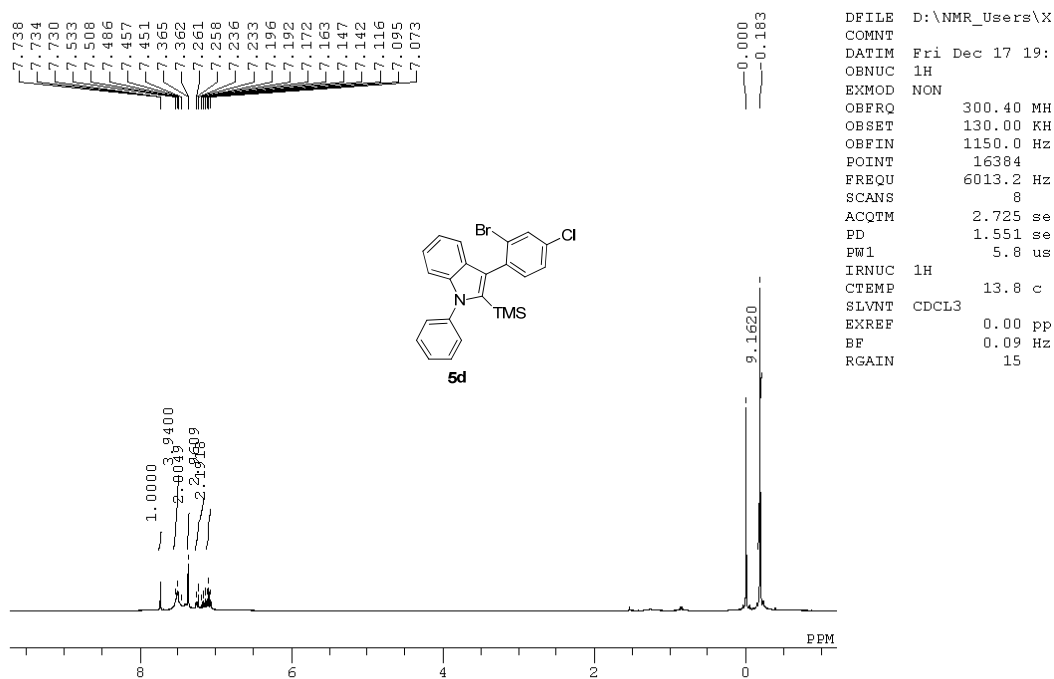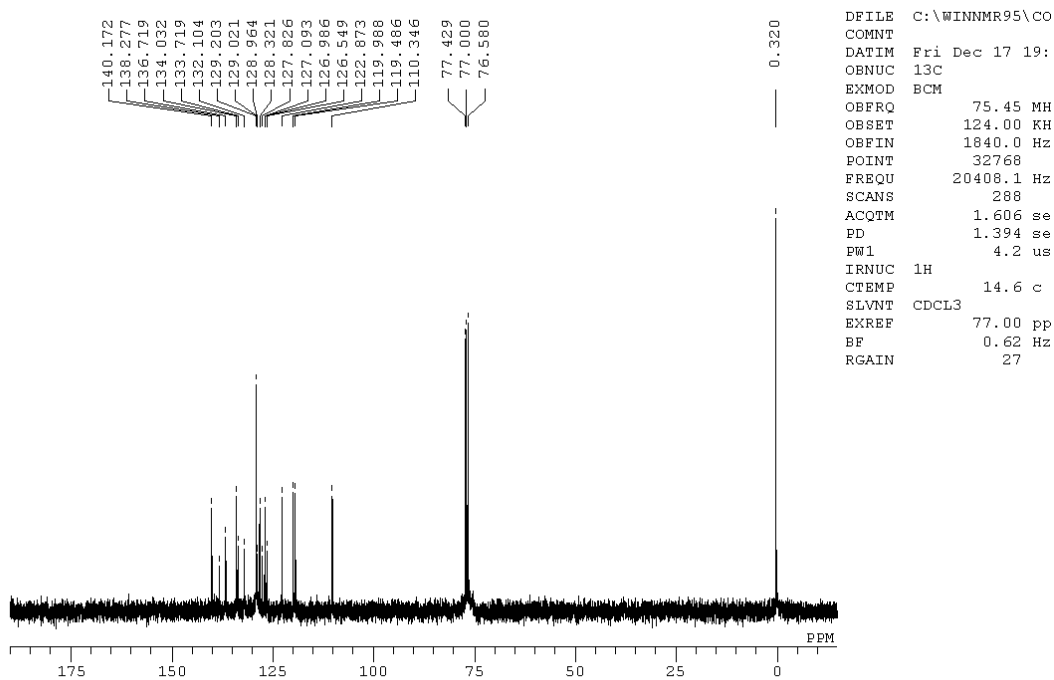

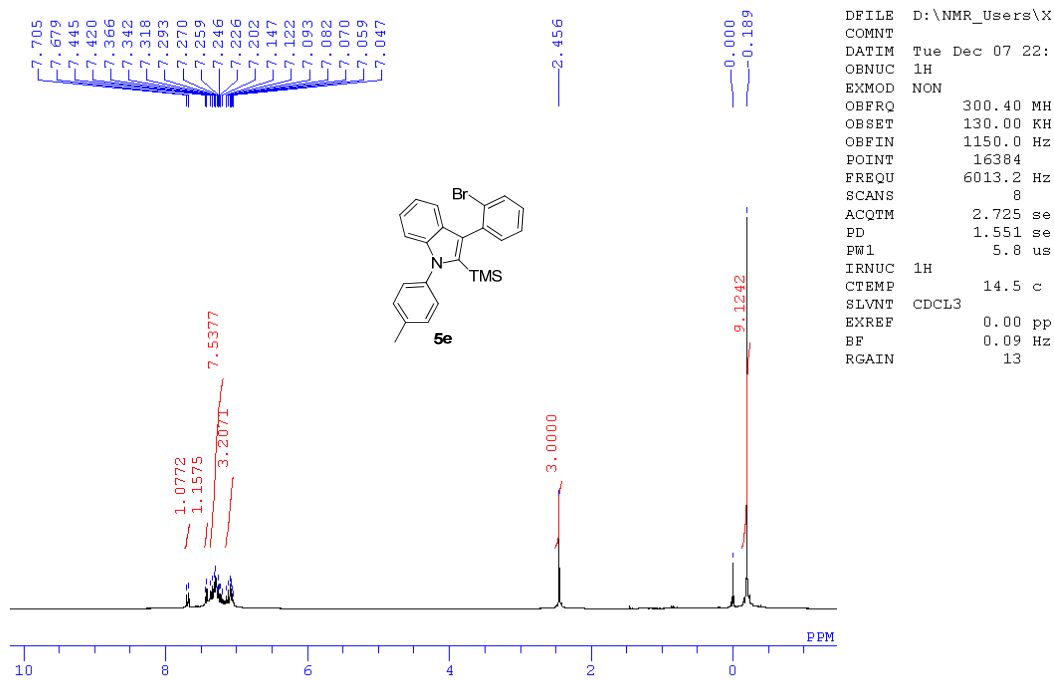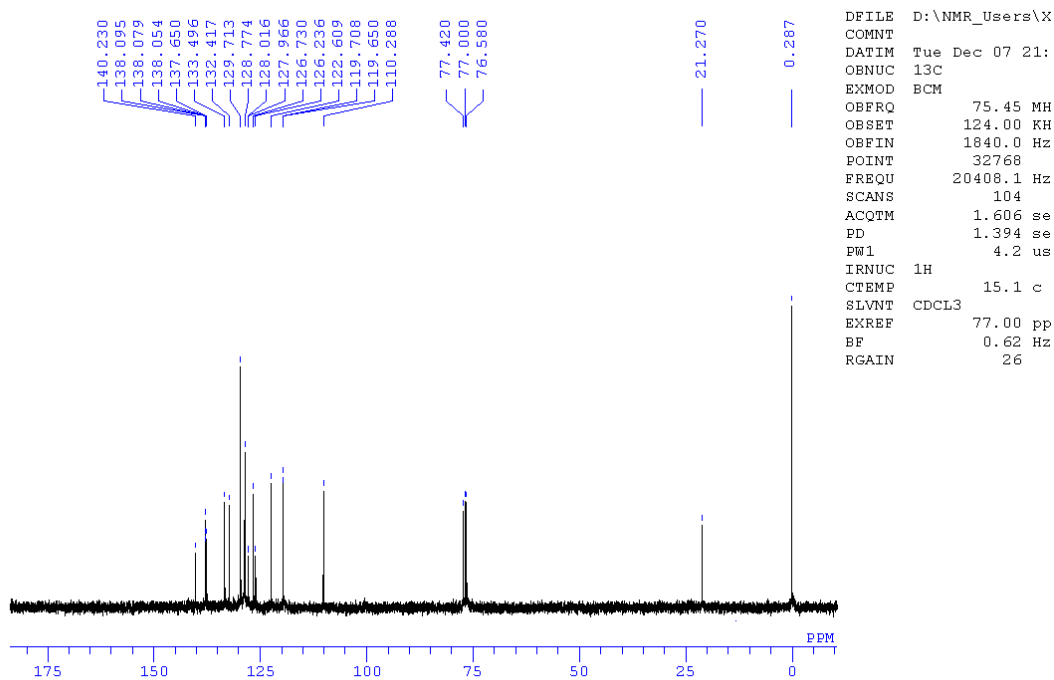

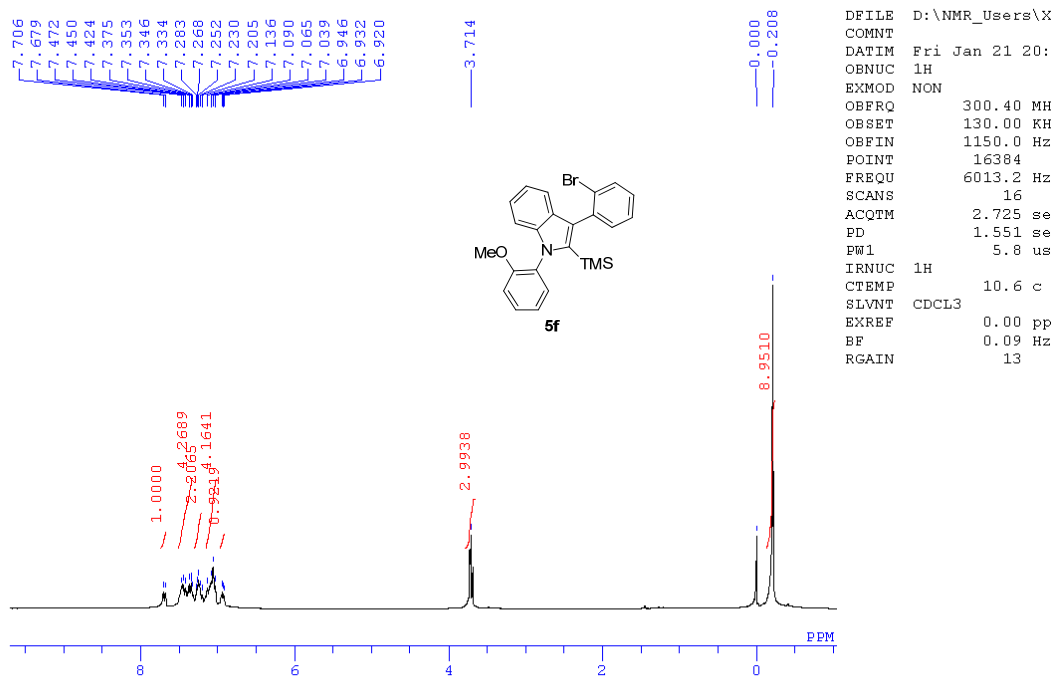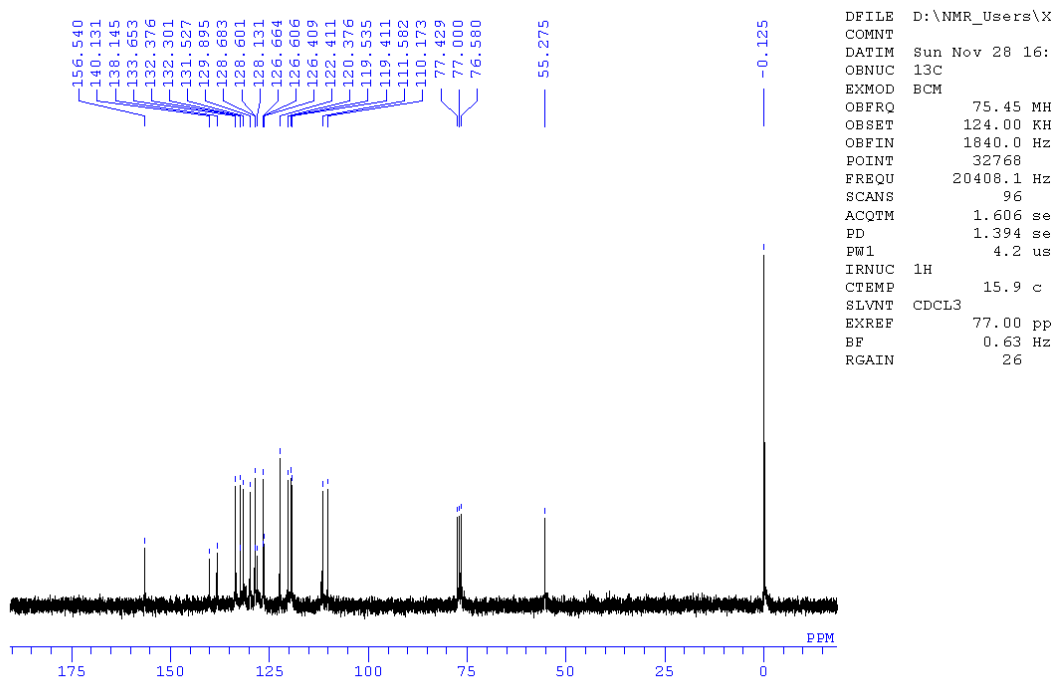

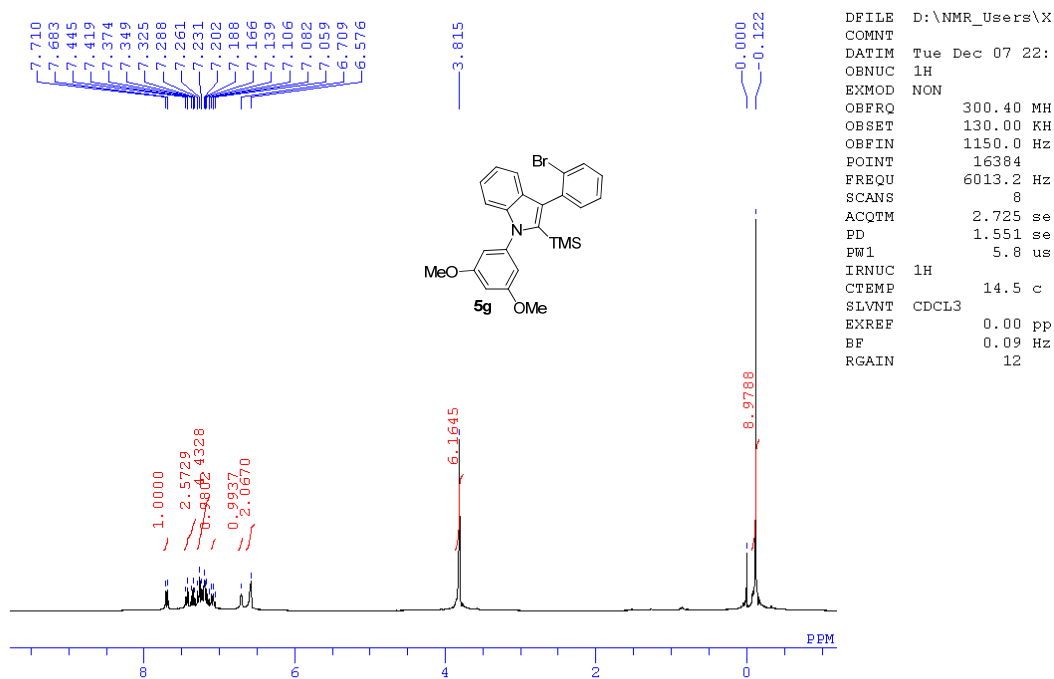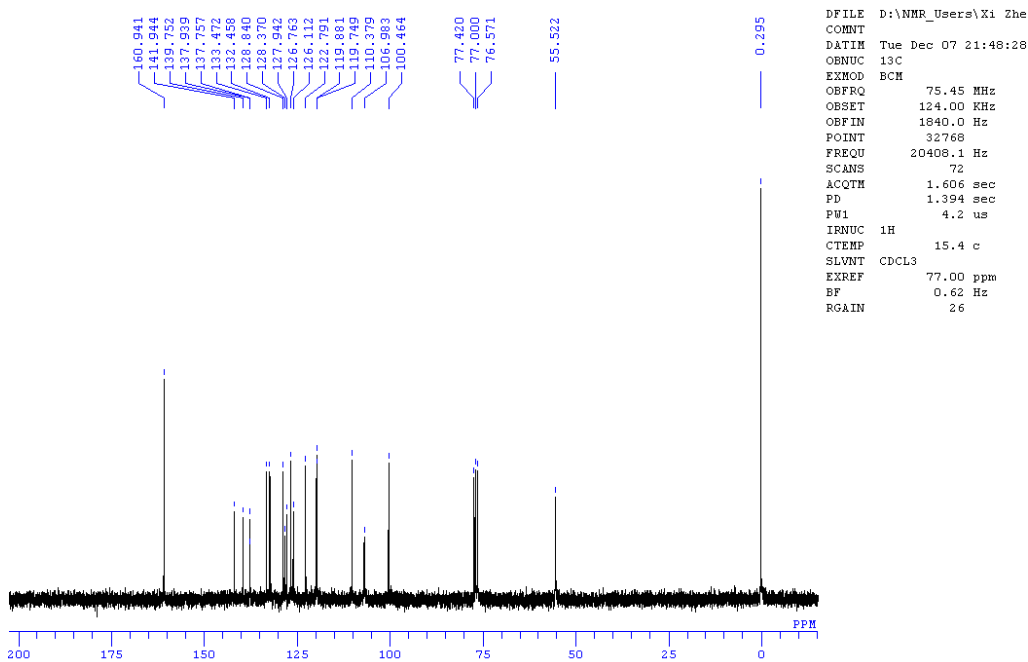

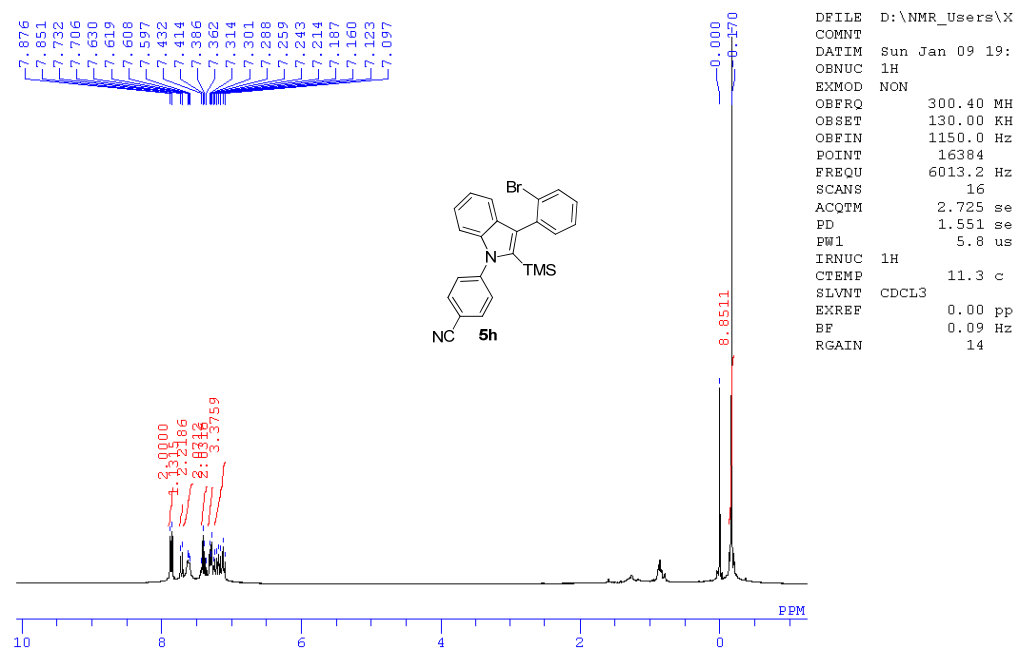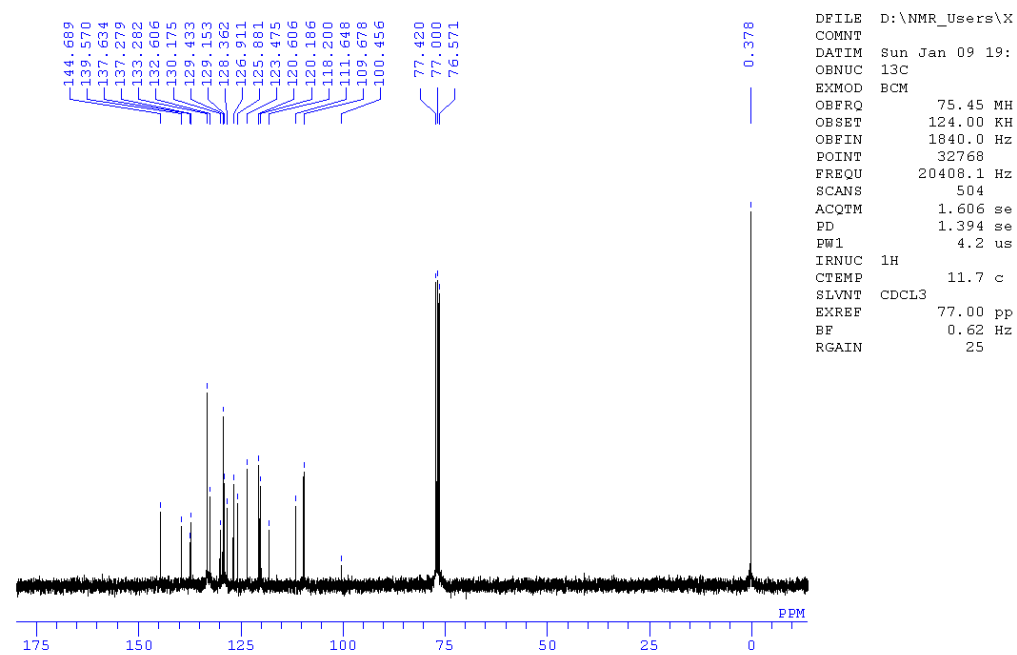

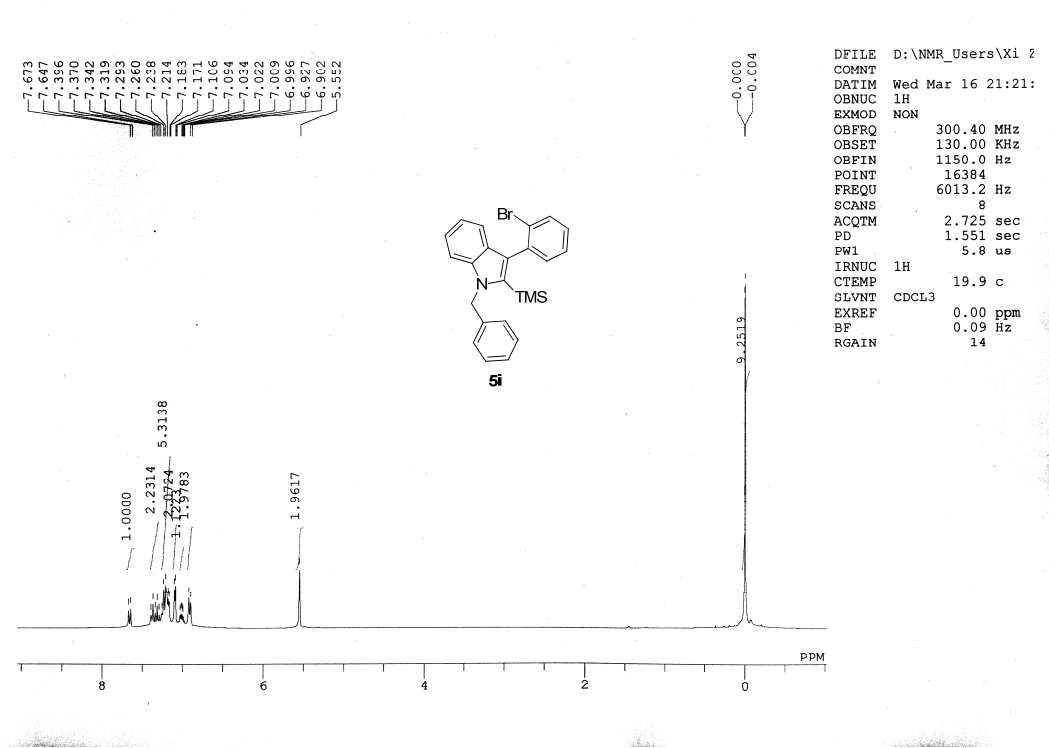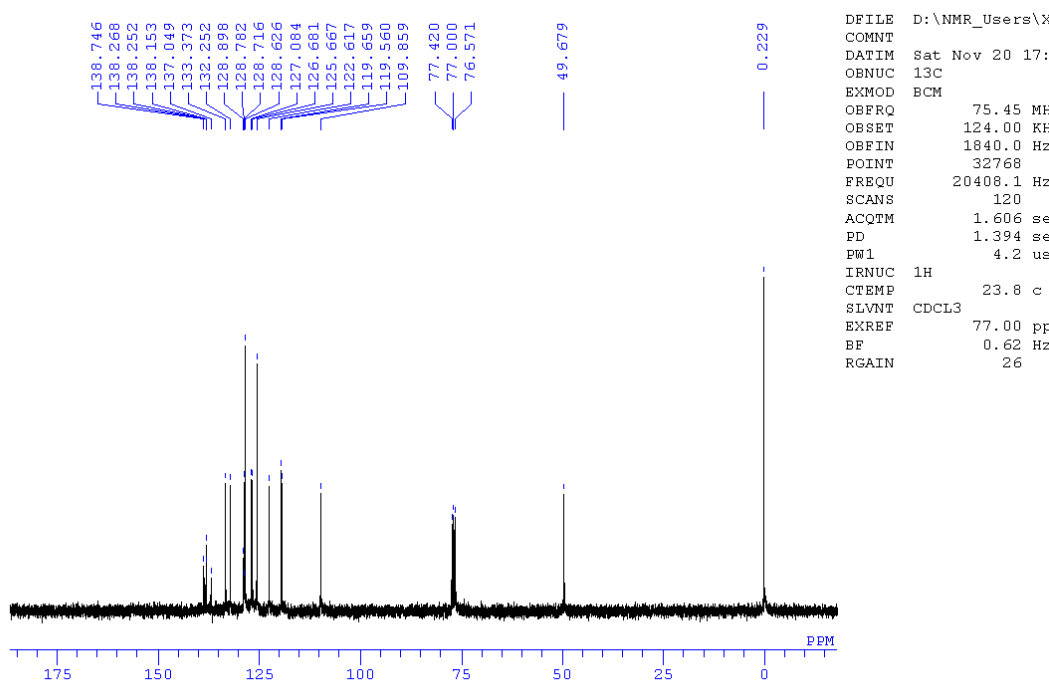

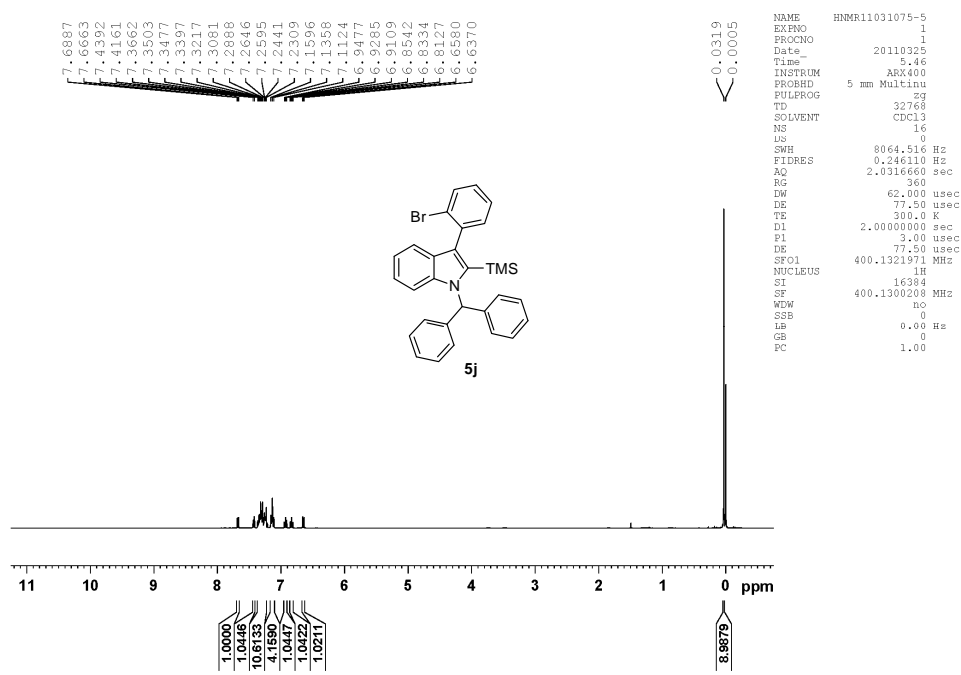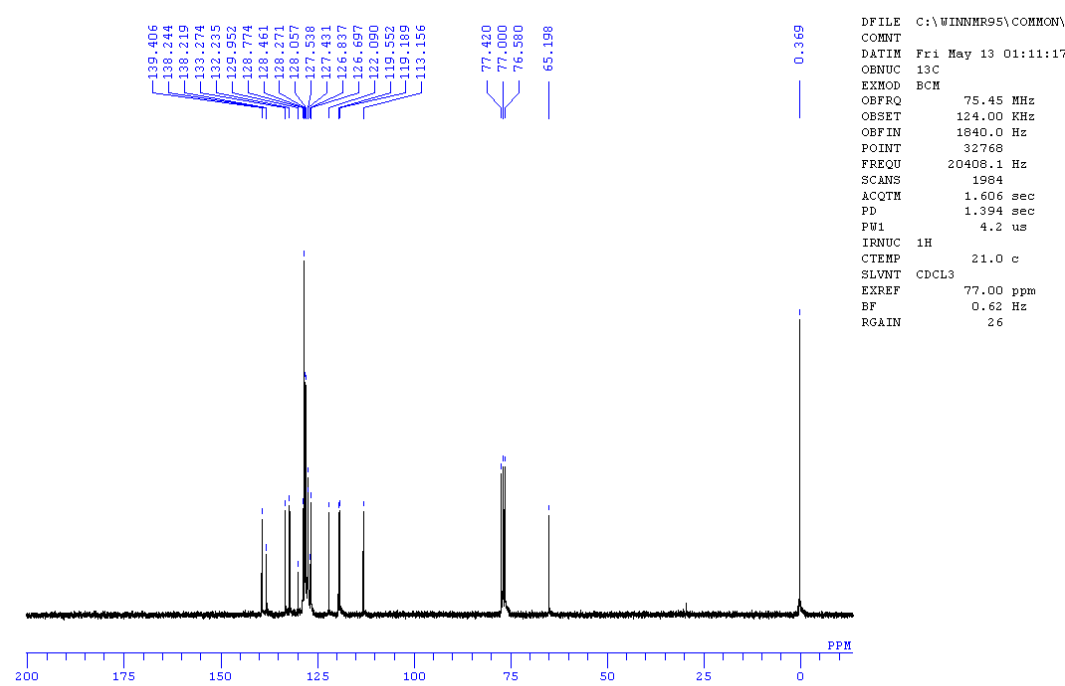



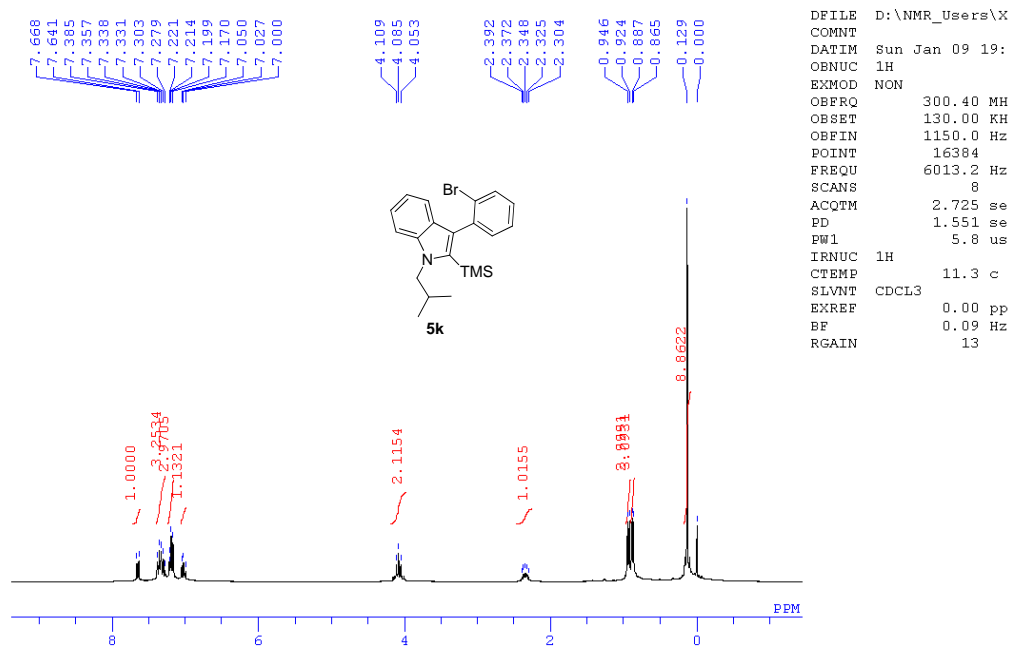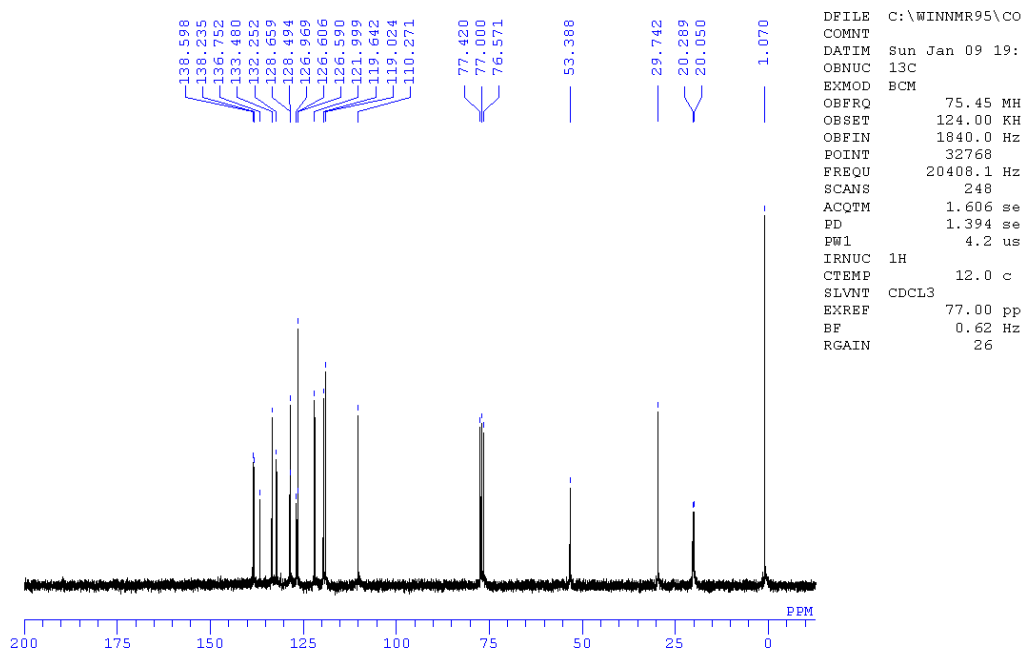

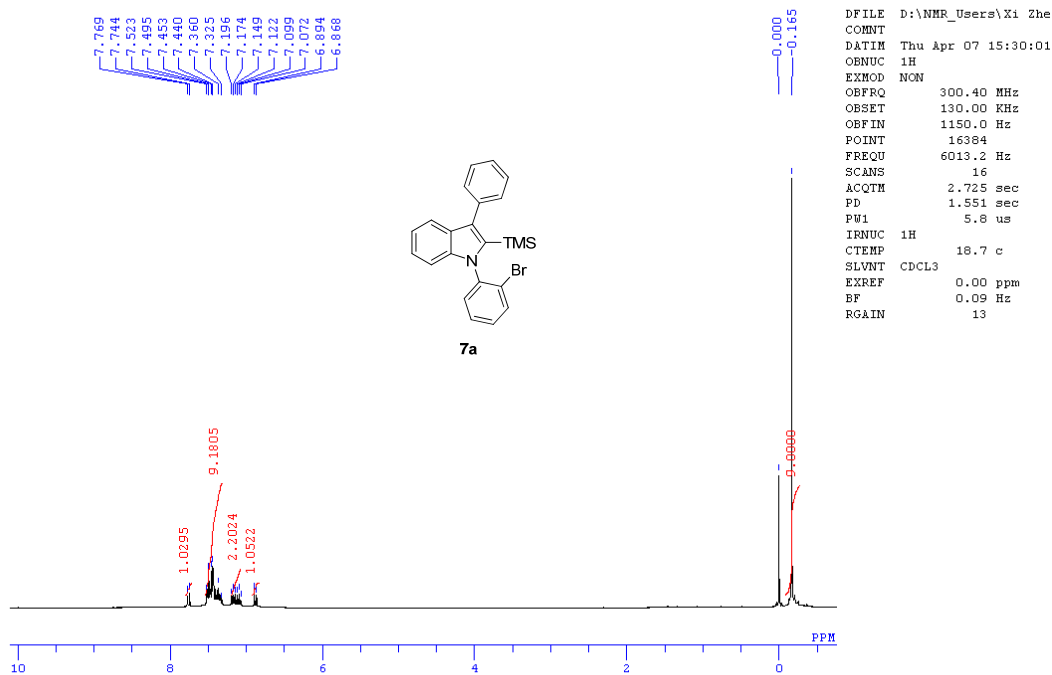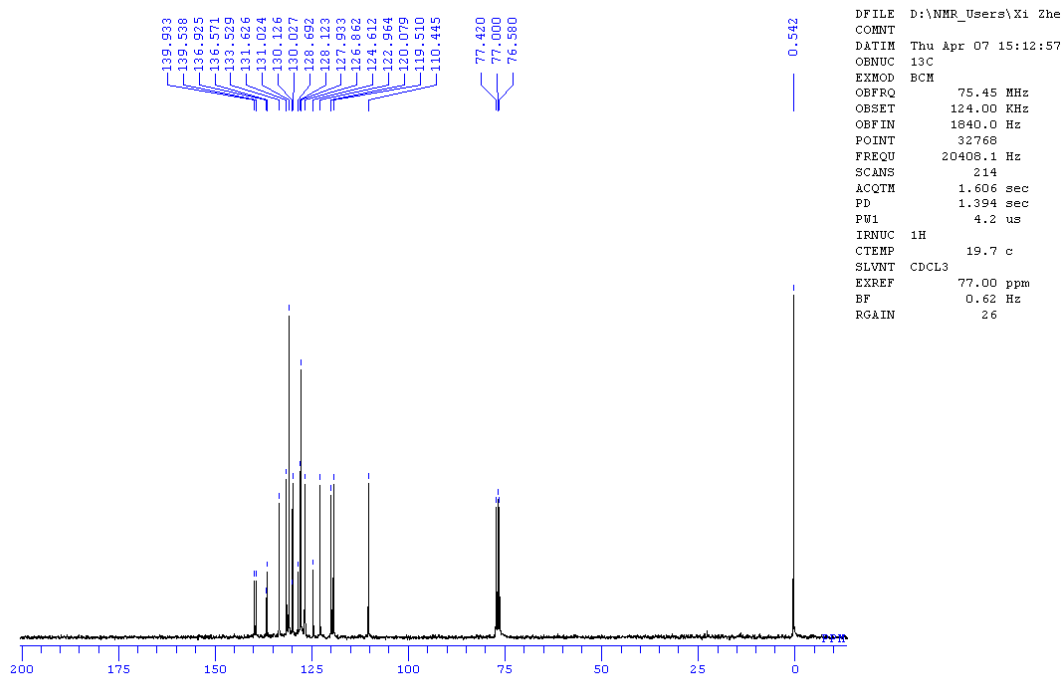

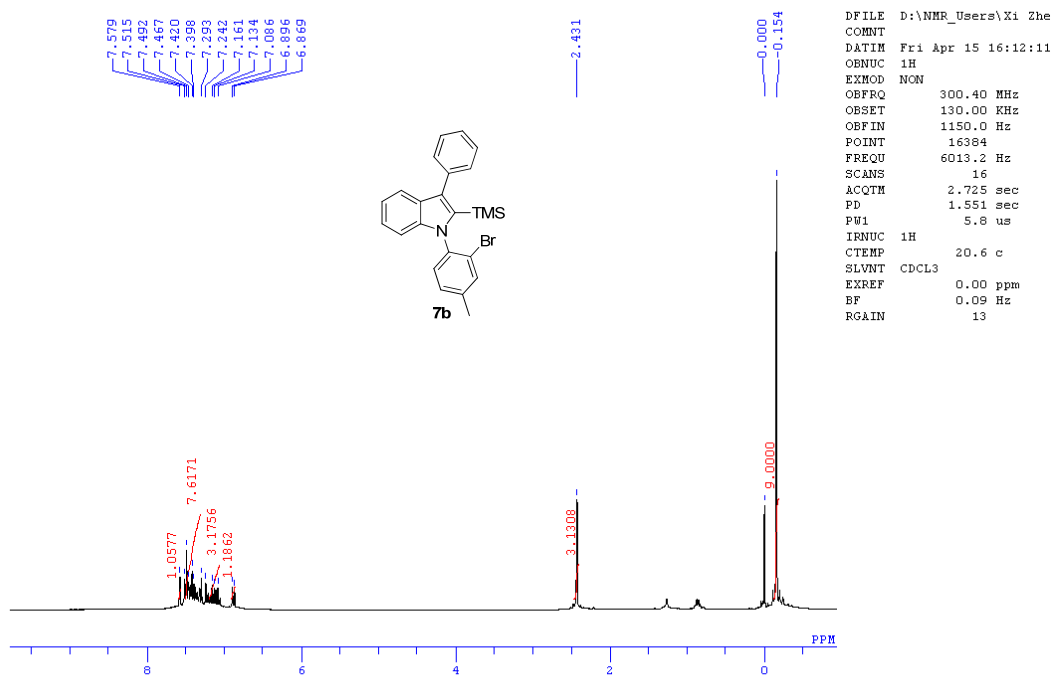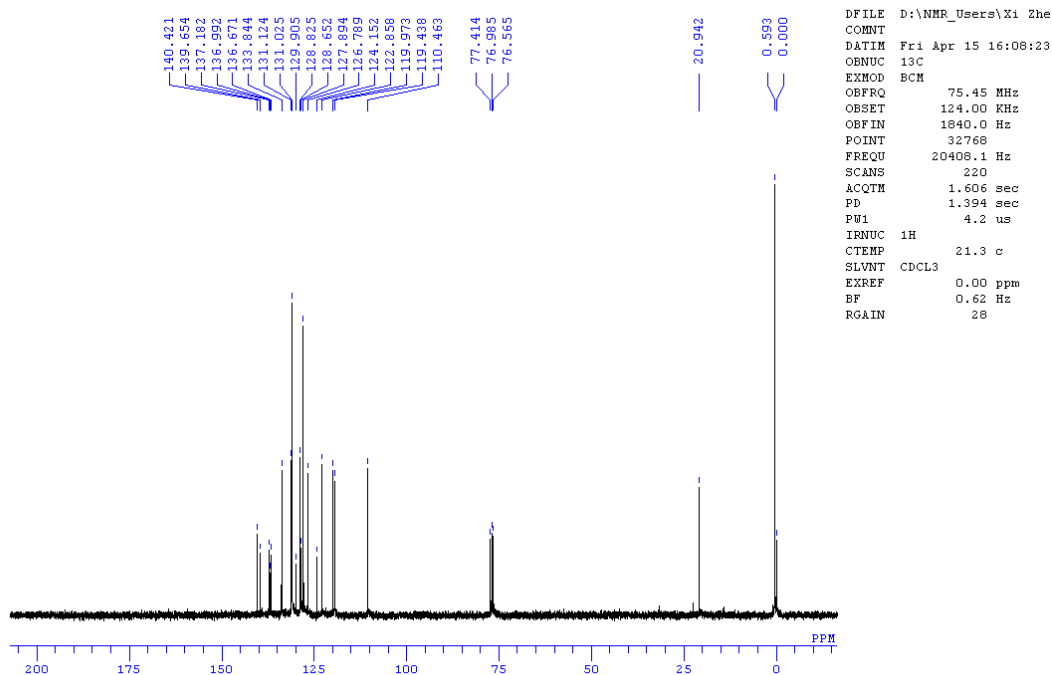

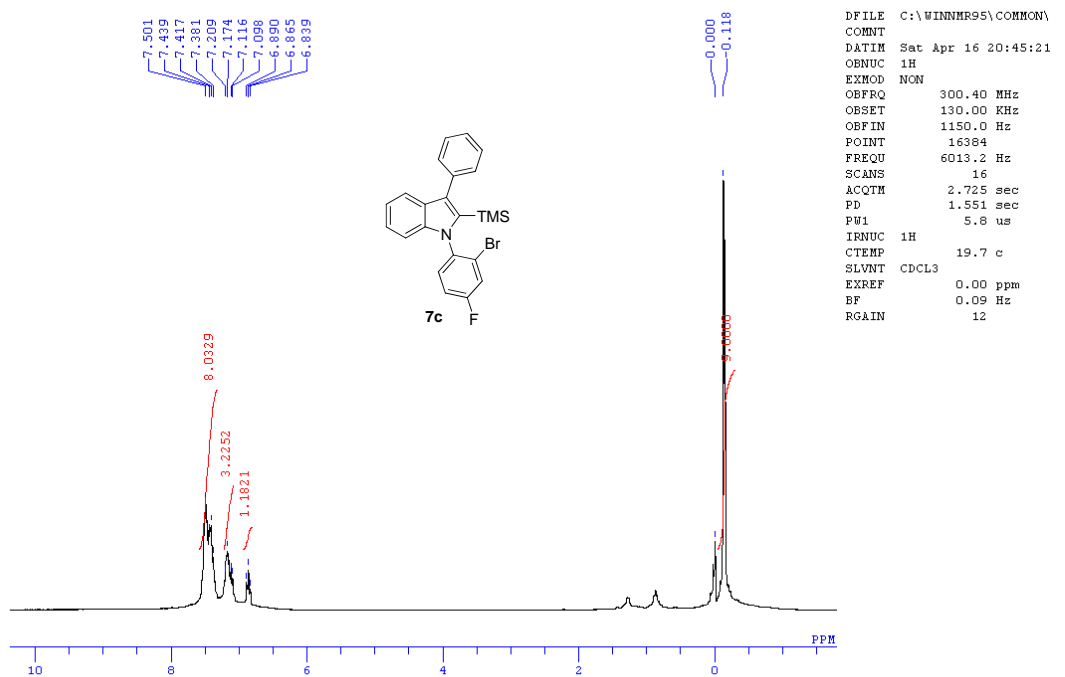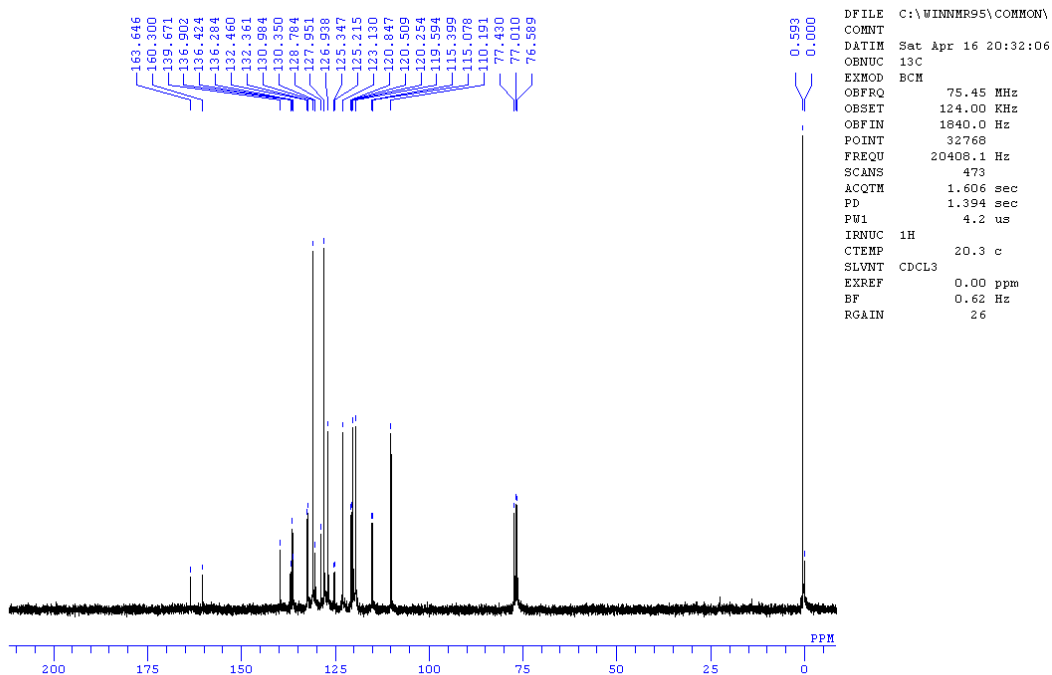

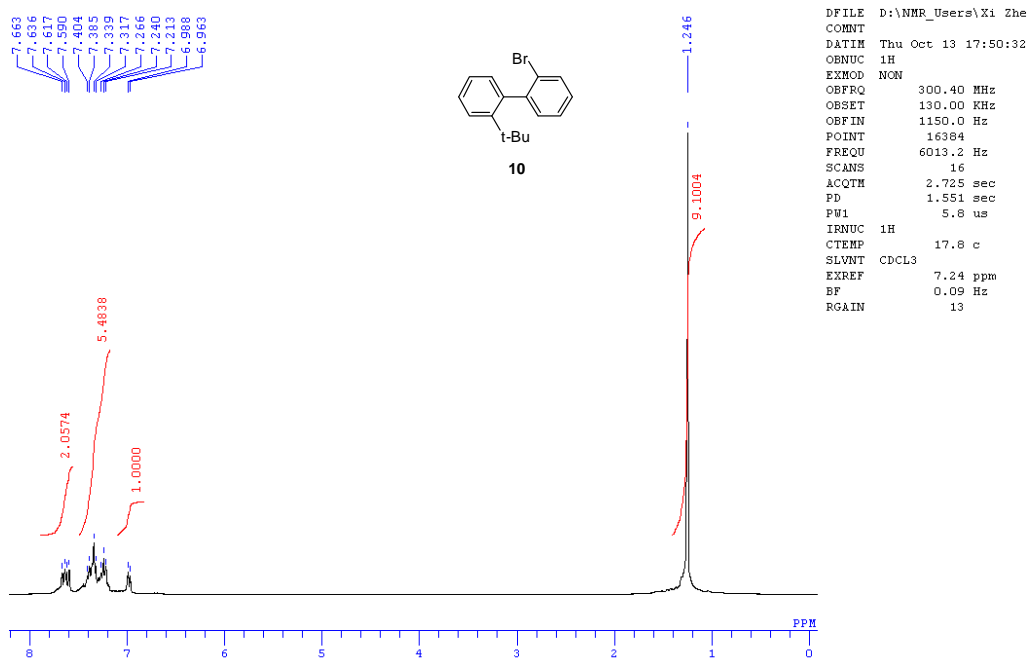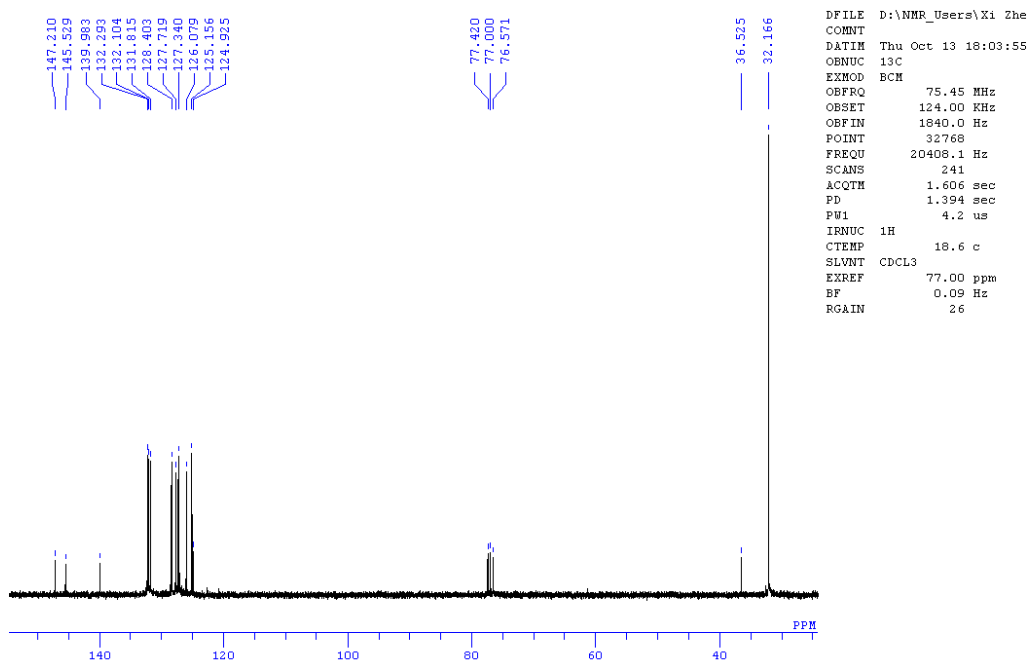

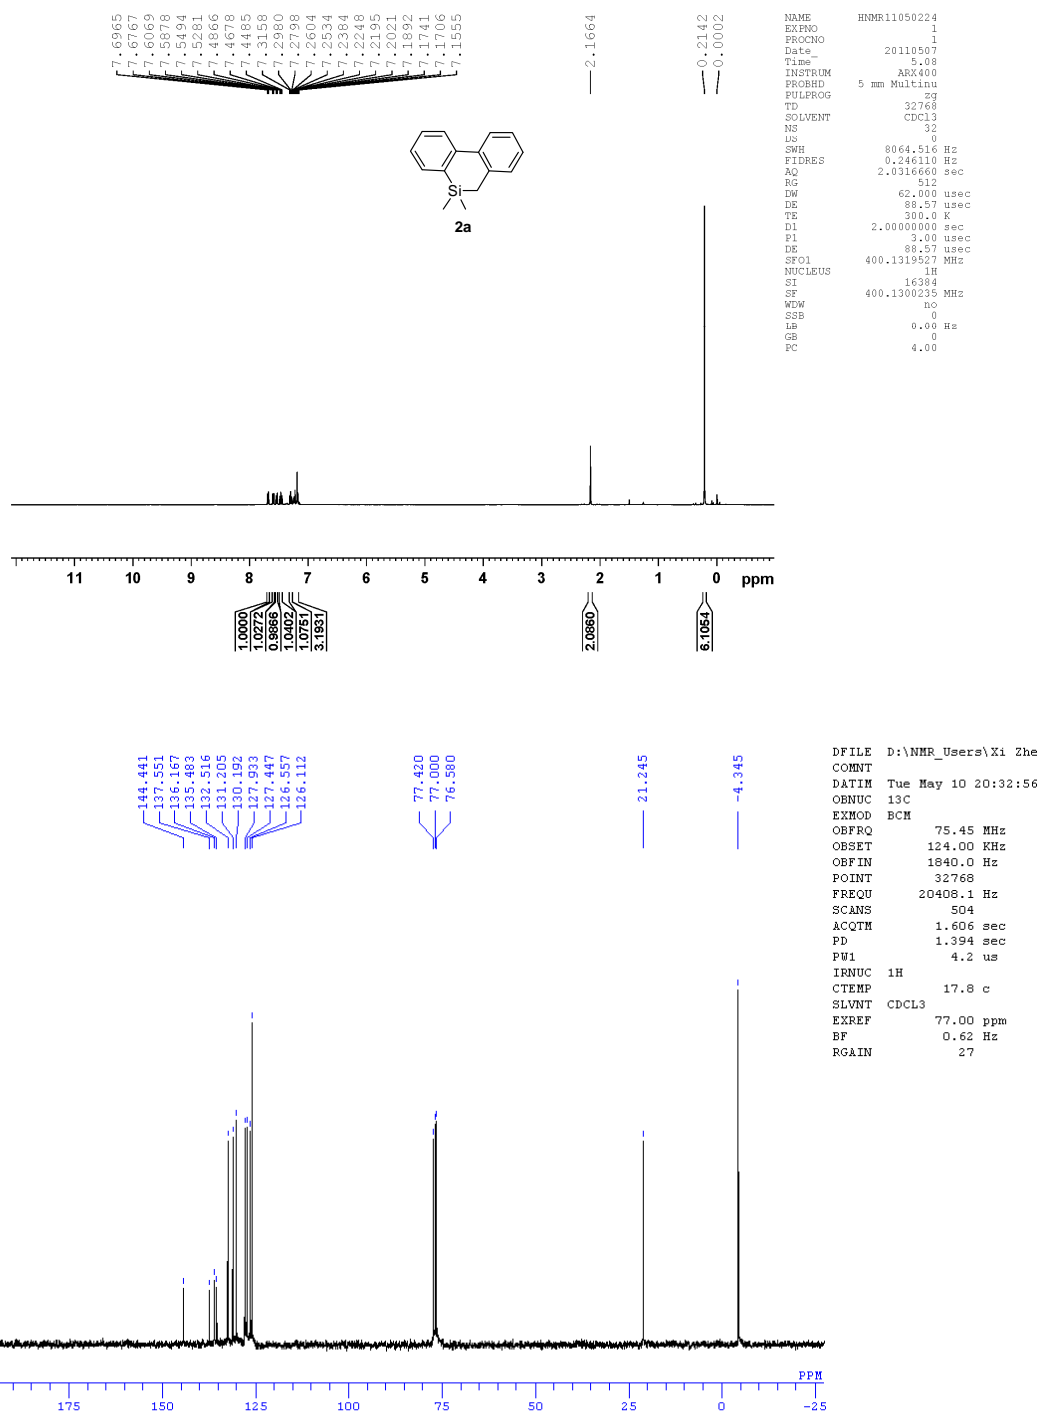

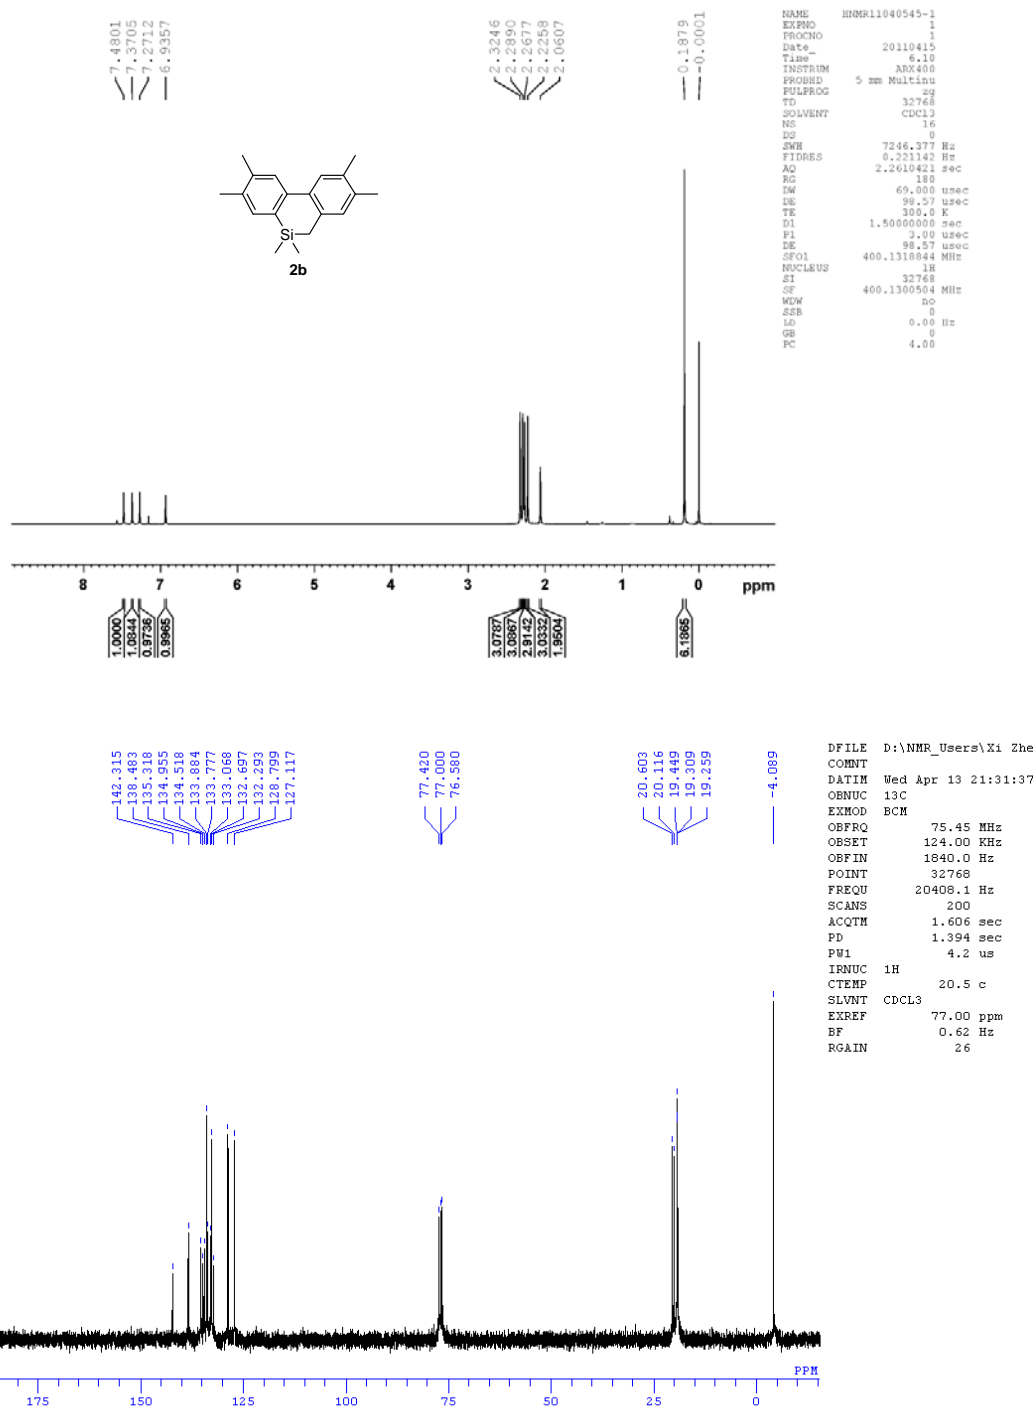

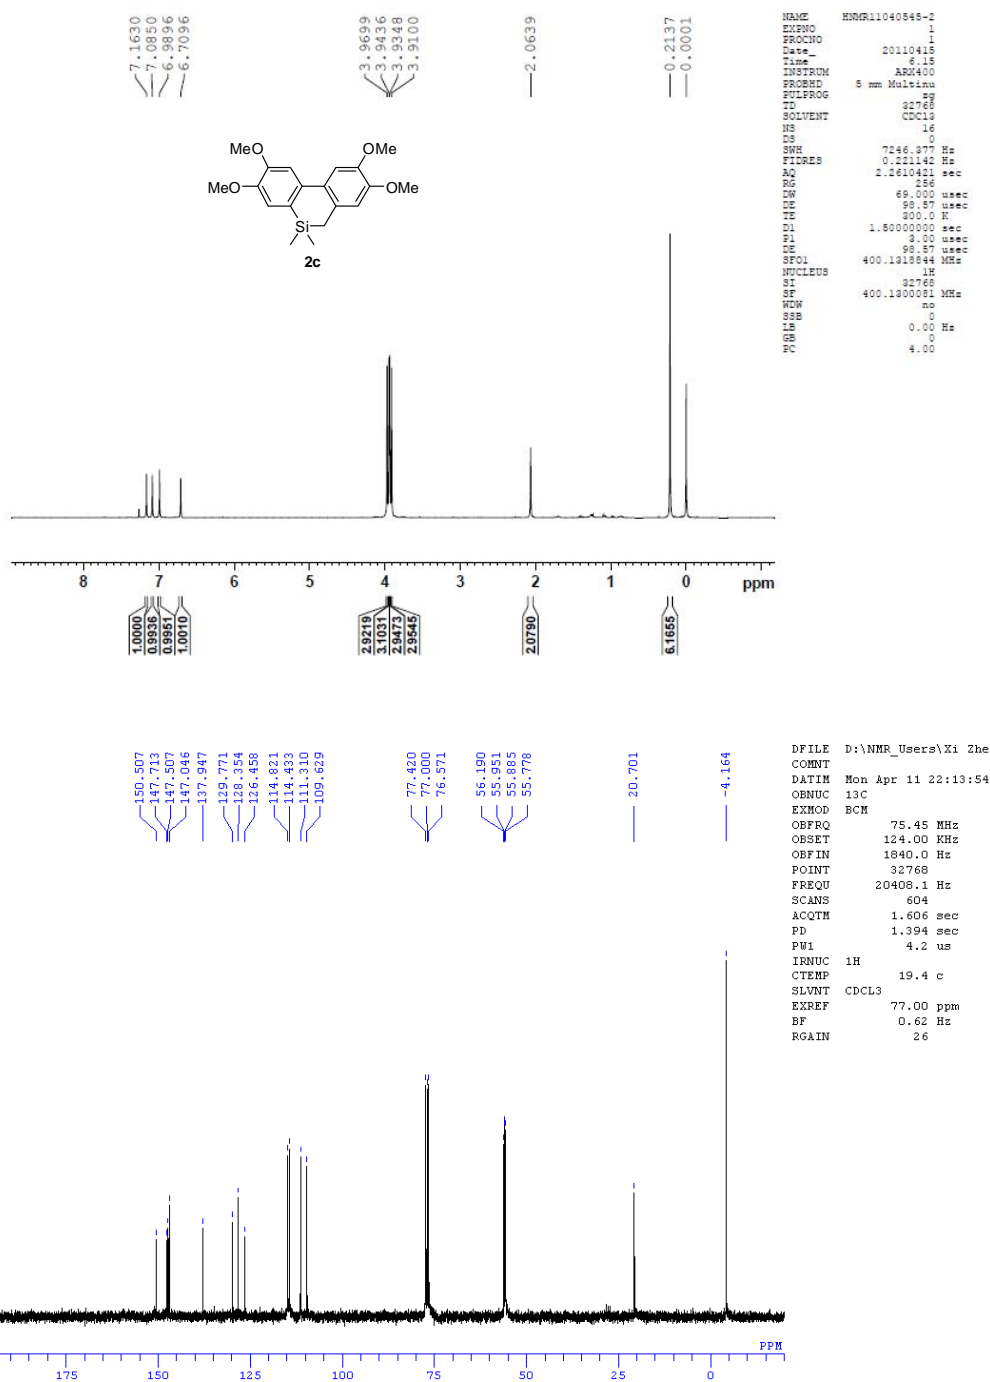



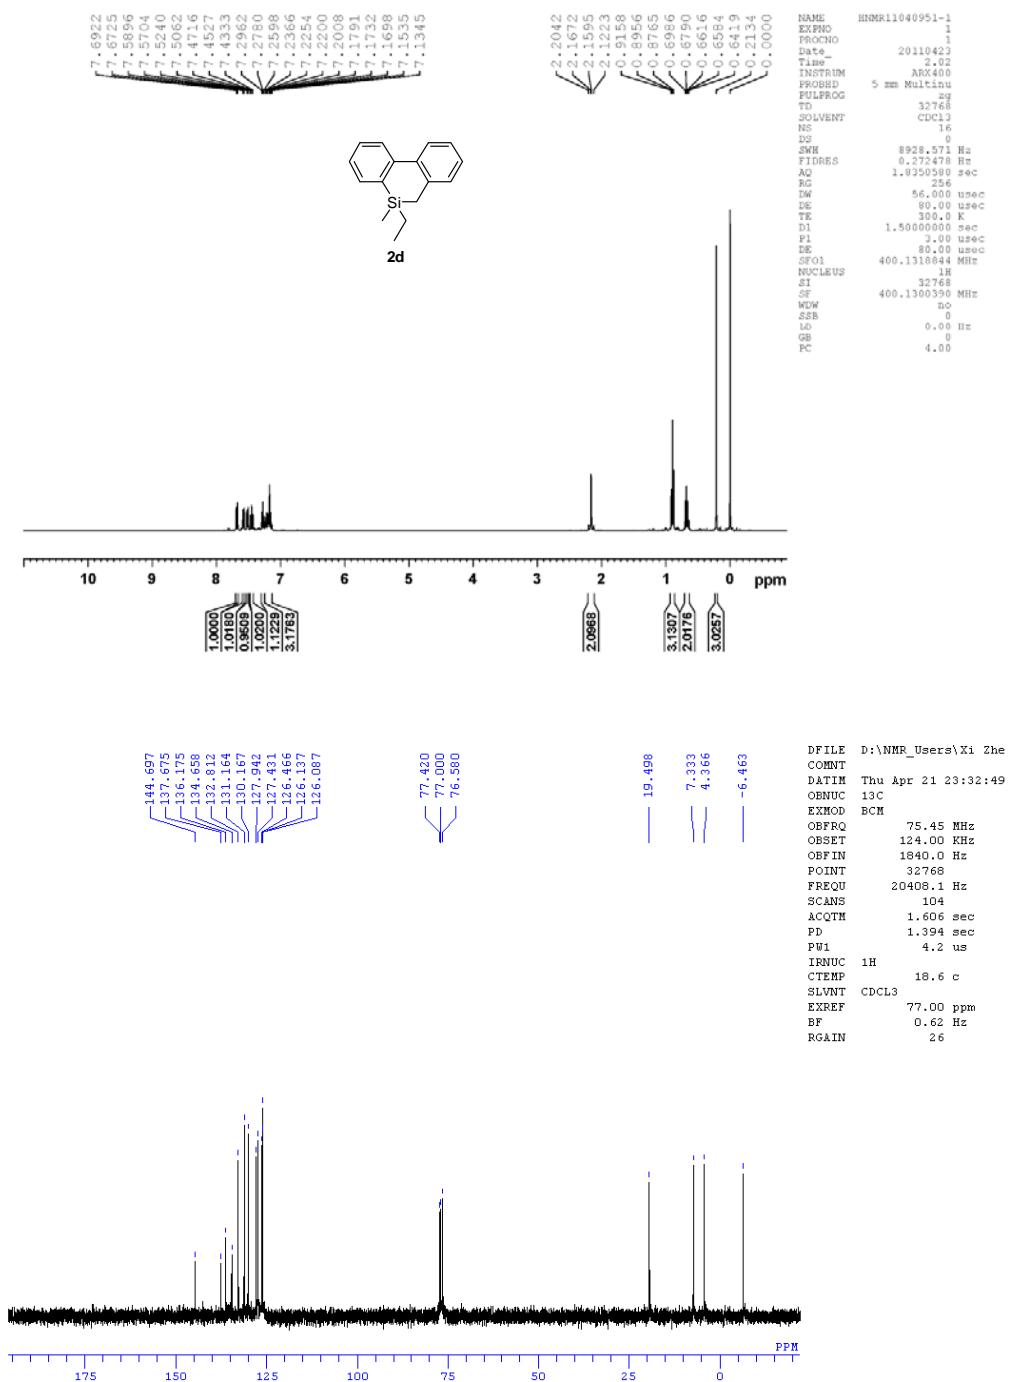

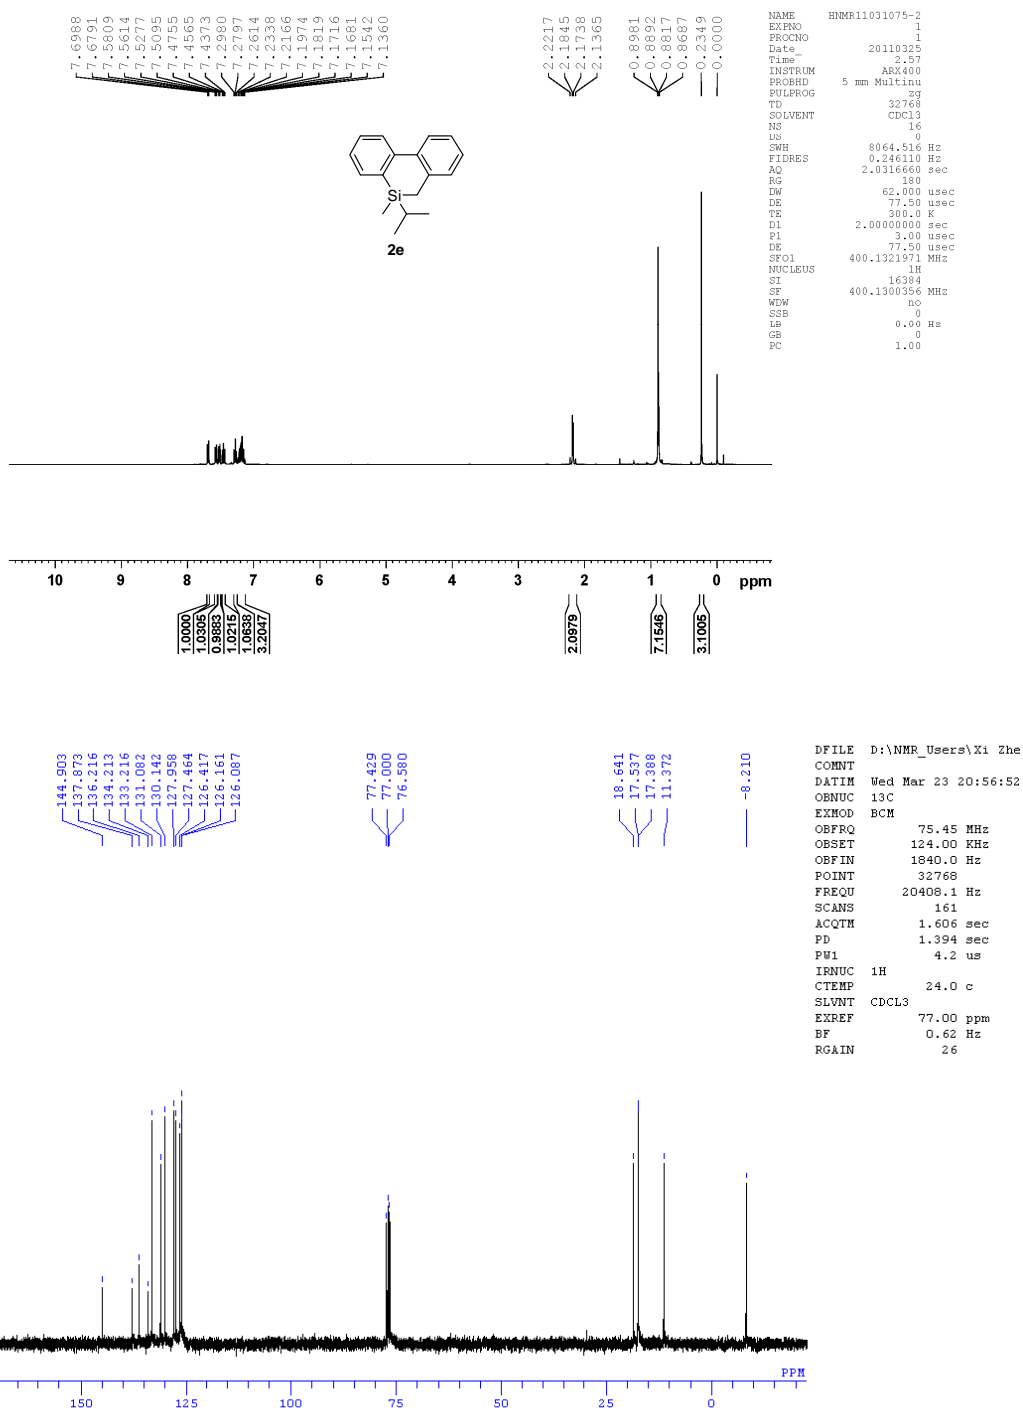

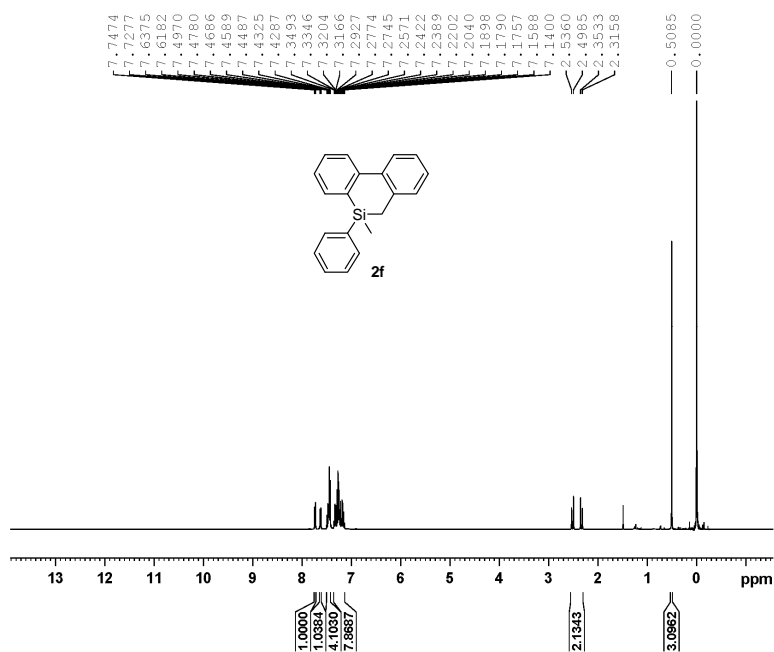

NAME HNMR11040951-2  
EXPNO 1  
PROCNO 1  
Date\_ 20110423  
Time 2.07  
INSTRUM ARX400  
PROBHD 5 mm Multinu  
PULPROG zg  
TD 32768  
SOLVENT CDCl3  
NS 16  
DS 0  
SWH 8928.571 Hz  
FIDRES 0.272478 Hz  
AQ 1.8350580 sec  
RG 256  
DW 56.000 usec  
DE 80.00 usec  
TE 300.0 K  
DL 1.50000000 sec  
FI 3.00 usec  
DE 80.00 usec  
SFO1 400.1318644 MHz  
NUCLEUS 1H  
SI 32768  
SF 400.1300251 MHz  
WDW no  
SSB 0  
LB 0.00 Hz  
GB 0  
PC 4.00

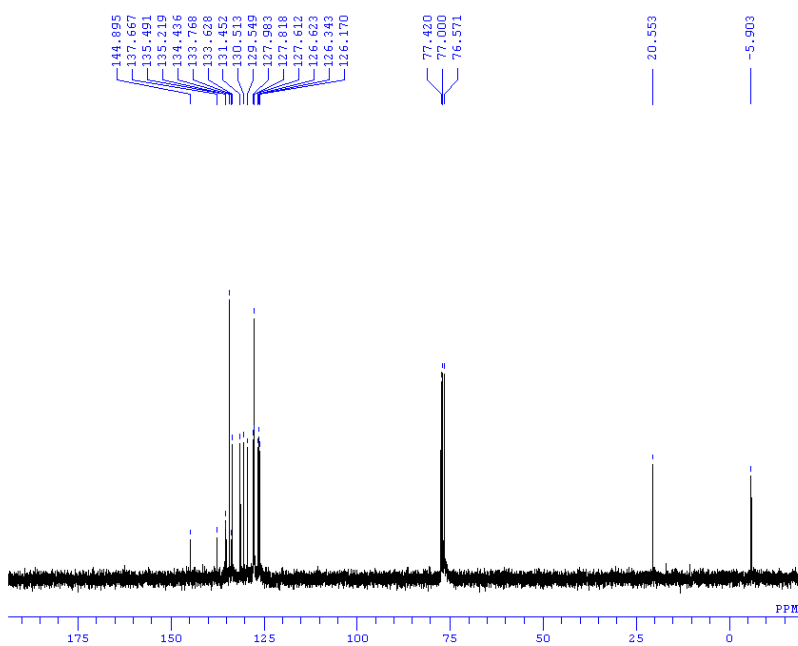

DFILE D:\NMR\_Users\Xi Zhe  
COMNT  
DATIM Thu Apr 21 23:54:41  
OBNUC 13C  
EXMOD BCM  
OBFRQ 75.45 MHz  
OBSET 124.00 KHz  
OBFIN 1840.0 Hz  
POINT 32768  
FREQU 20408.1 Hz  
SCANS 336  
ACQTH 1.606 sec  
PD 1.394 sec  
PW1 4.2 us  
IRNUC 1H  
CTEMP 18.6 c  
SLVNT CDCL3  
EXREF 77.00 ppm  
BF 0.62 Hz  
RGAIN 26

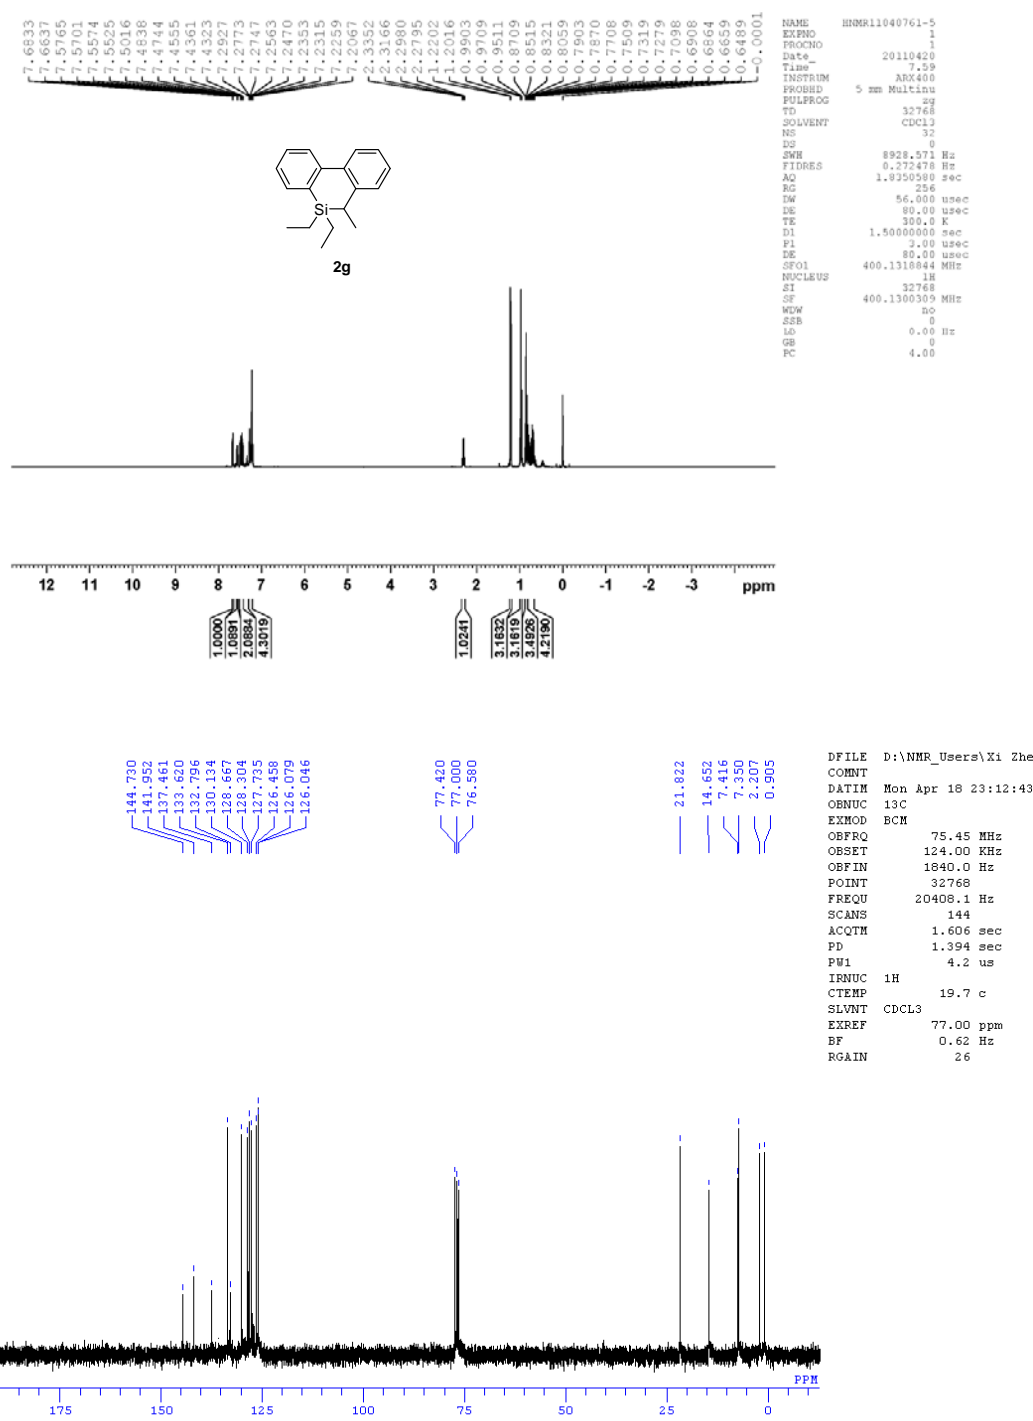

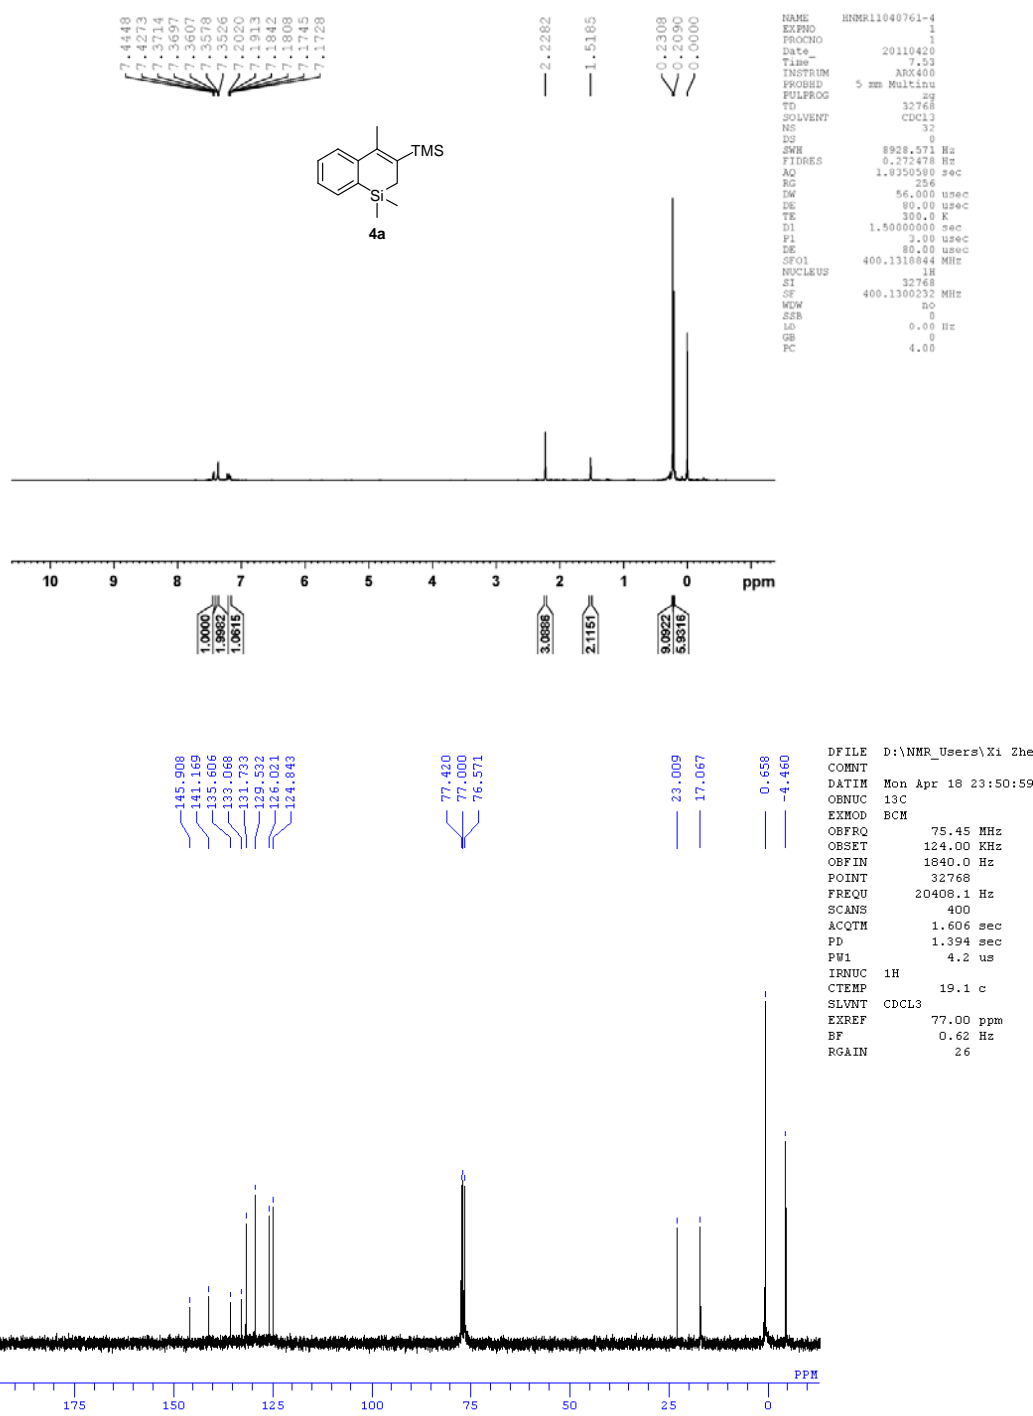

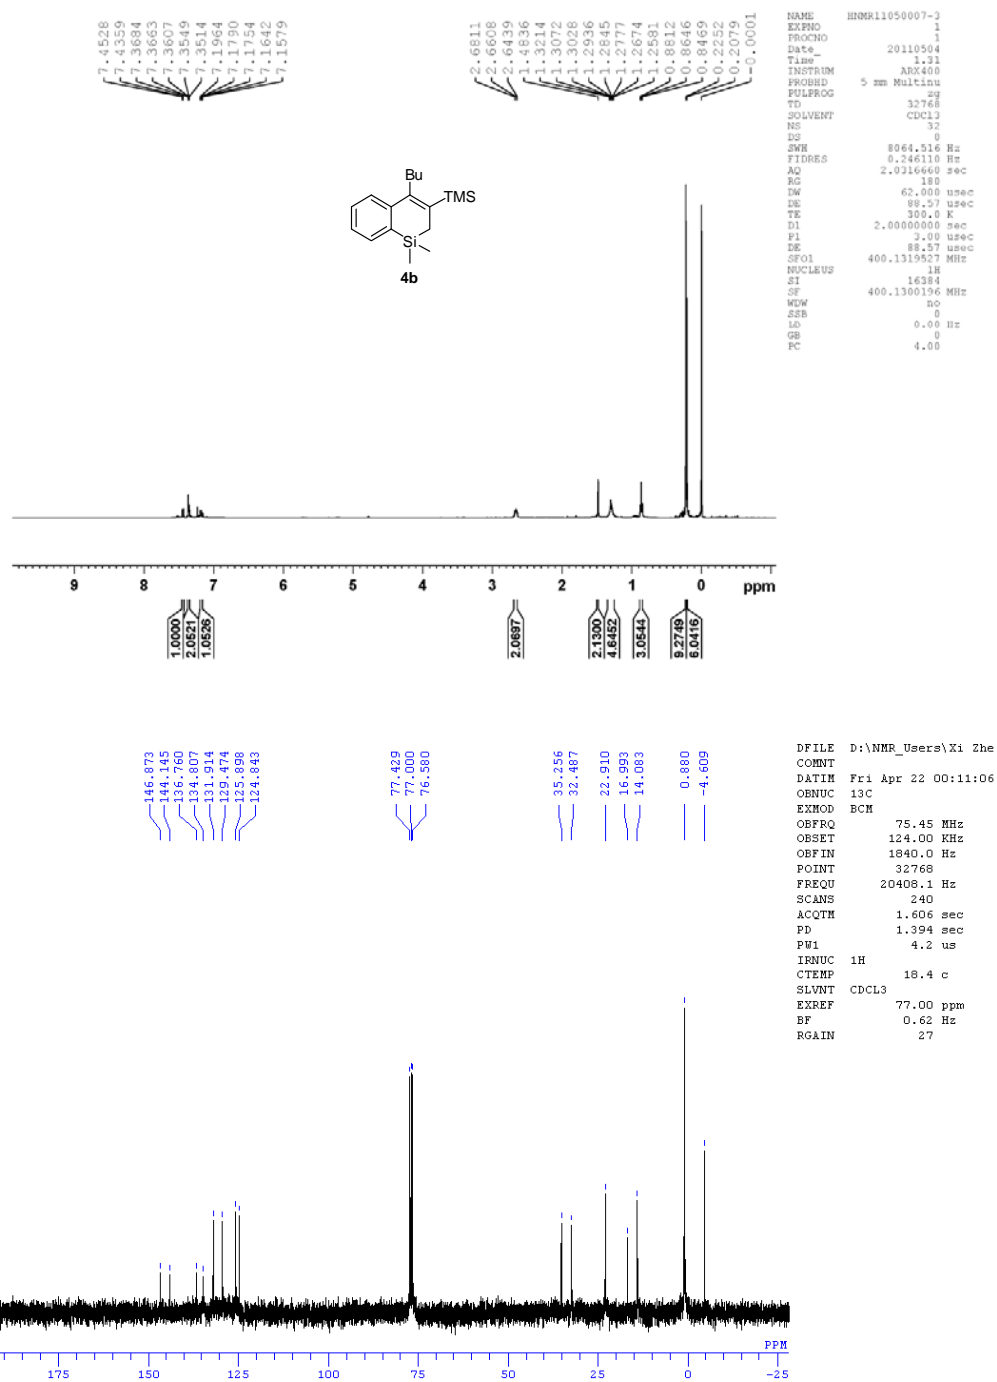

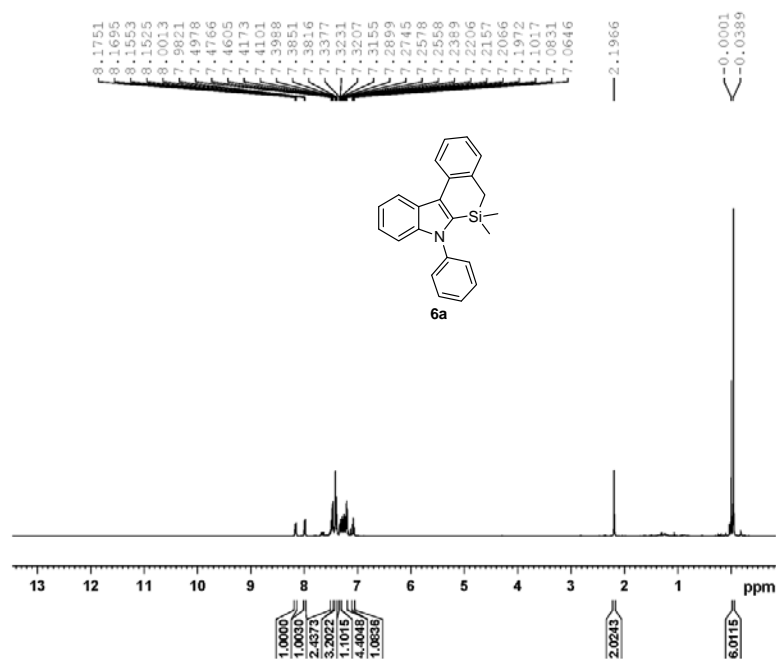

NAME HNMR11041007-1  
EXPNO 1  
PROCNO 1  
Date\_ 20110426  
Time 23.30  
INSTRUM ARX400  
PROBHD 5 mm Multinu  
PULPROG zg  
TD 32768  
SOLVENT CDCl3  
NS 16  
DS 0  
SWH 8928.571 Hz  
FIDRES 0.272478 Hz  
AQ 1.9250580 sec  
RG 128  
DM 56.000 usec  
DE 80.00 usec  
TE 300.0 K  
D1 1.50000000 sec  
F1 2.00 usec  
DE 80.00 usec  
SFO1 400.1318844 MHz  
NUCLEUS 1H  
SI 32768  
SF 400.1300606 MHz  
RGW no  
SFB 0  
LB 0.00 Hz  
GB 0  
PC 4.00

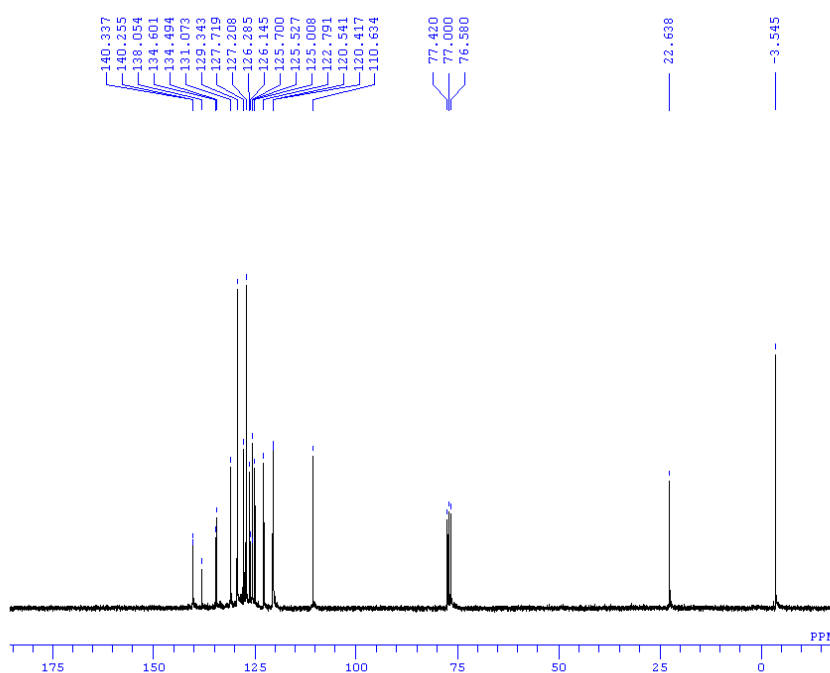

DFILE D:\NMR\_Users\Xi Zhe  
COMNT  
DATIM Sat Apr 23 21:40:18  
EXMNUC 13C  
EXMOD BCM  
OBFRQ 75.45 MHz  
OBSET 124.00 KHz  
OBFIN 1840.0 Hz  
POINT 32768  
FREQU 20408.1 Hz  
SCANS 560  
ACQTM 1.606 sec  
PD 1.394 sec  
PW1 4.2 us  
IRNUC 1H  
CTEMP 19.9 c  
SLVNT CDCl3  
EXREF 77.00 ppm  
BF 0.62 Hz  
RGAIN 26

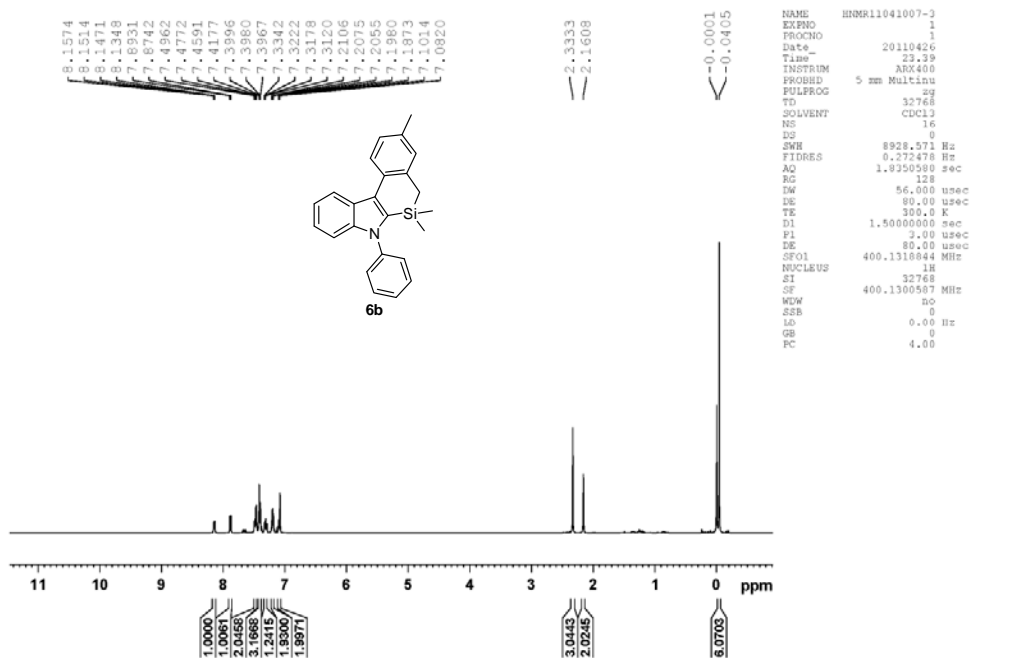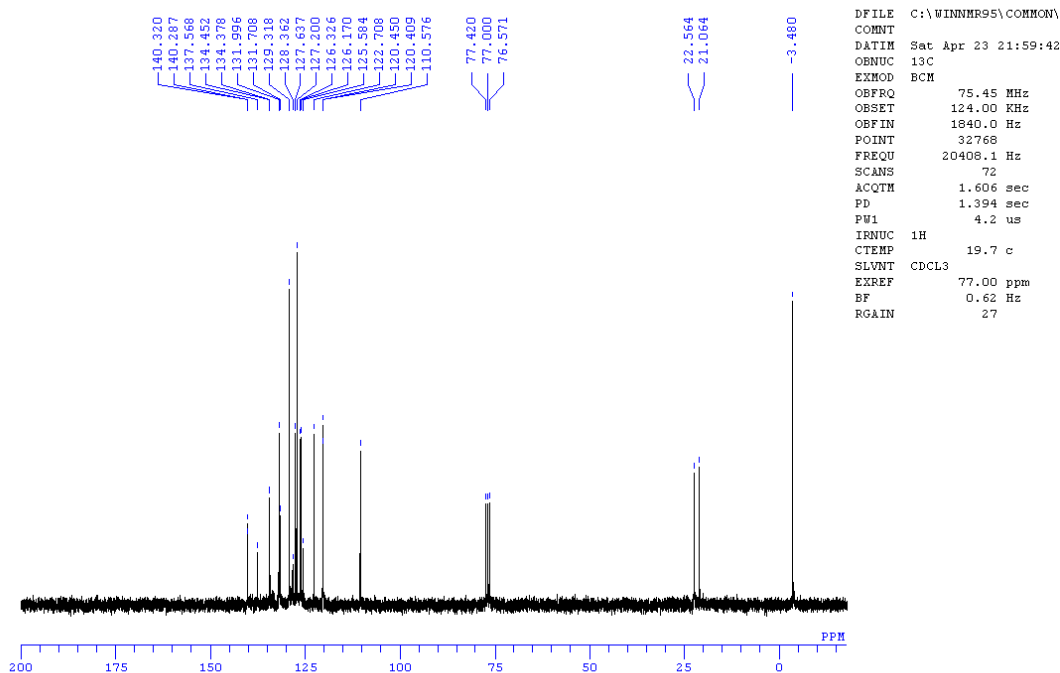



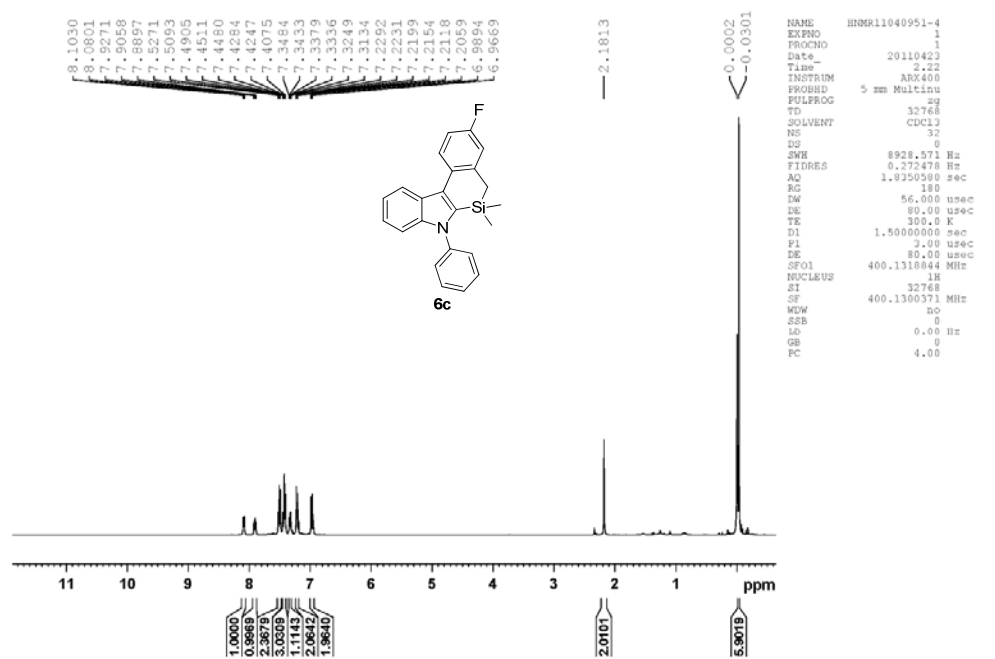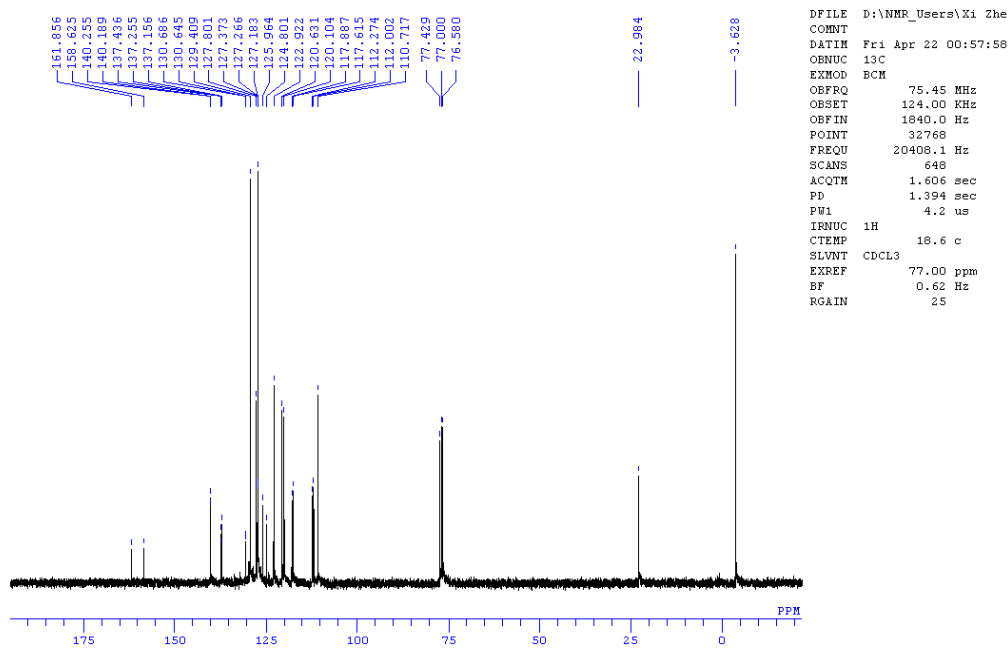

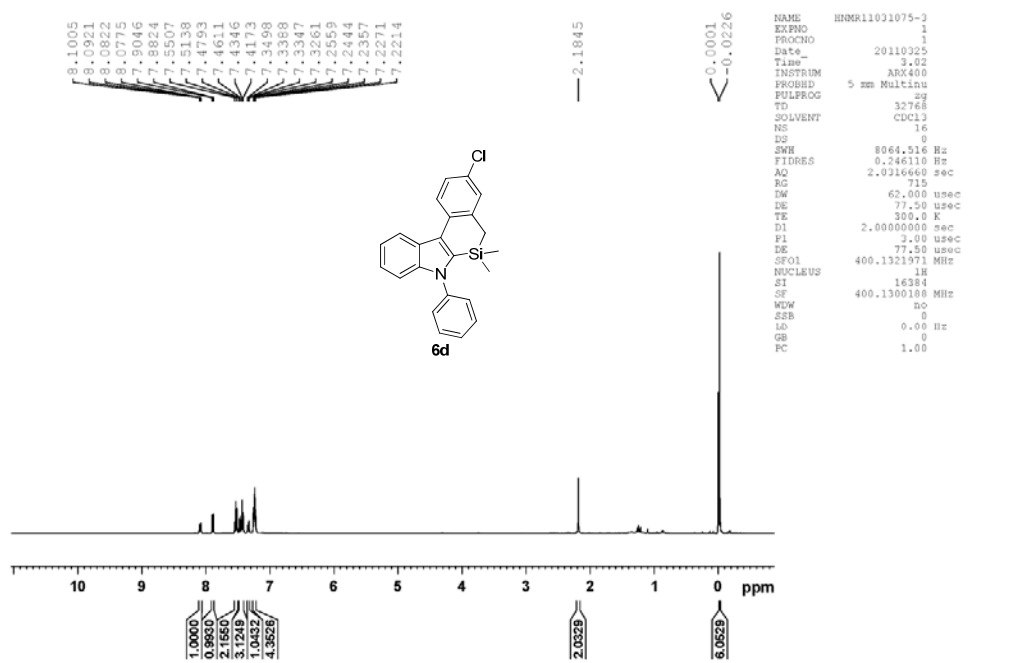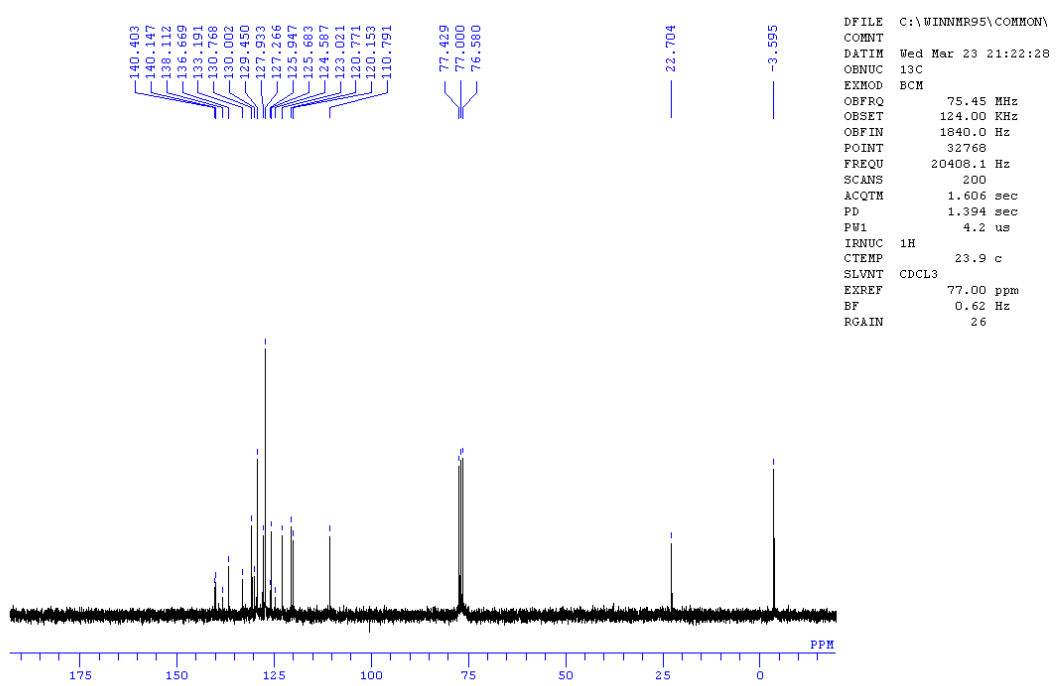



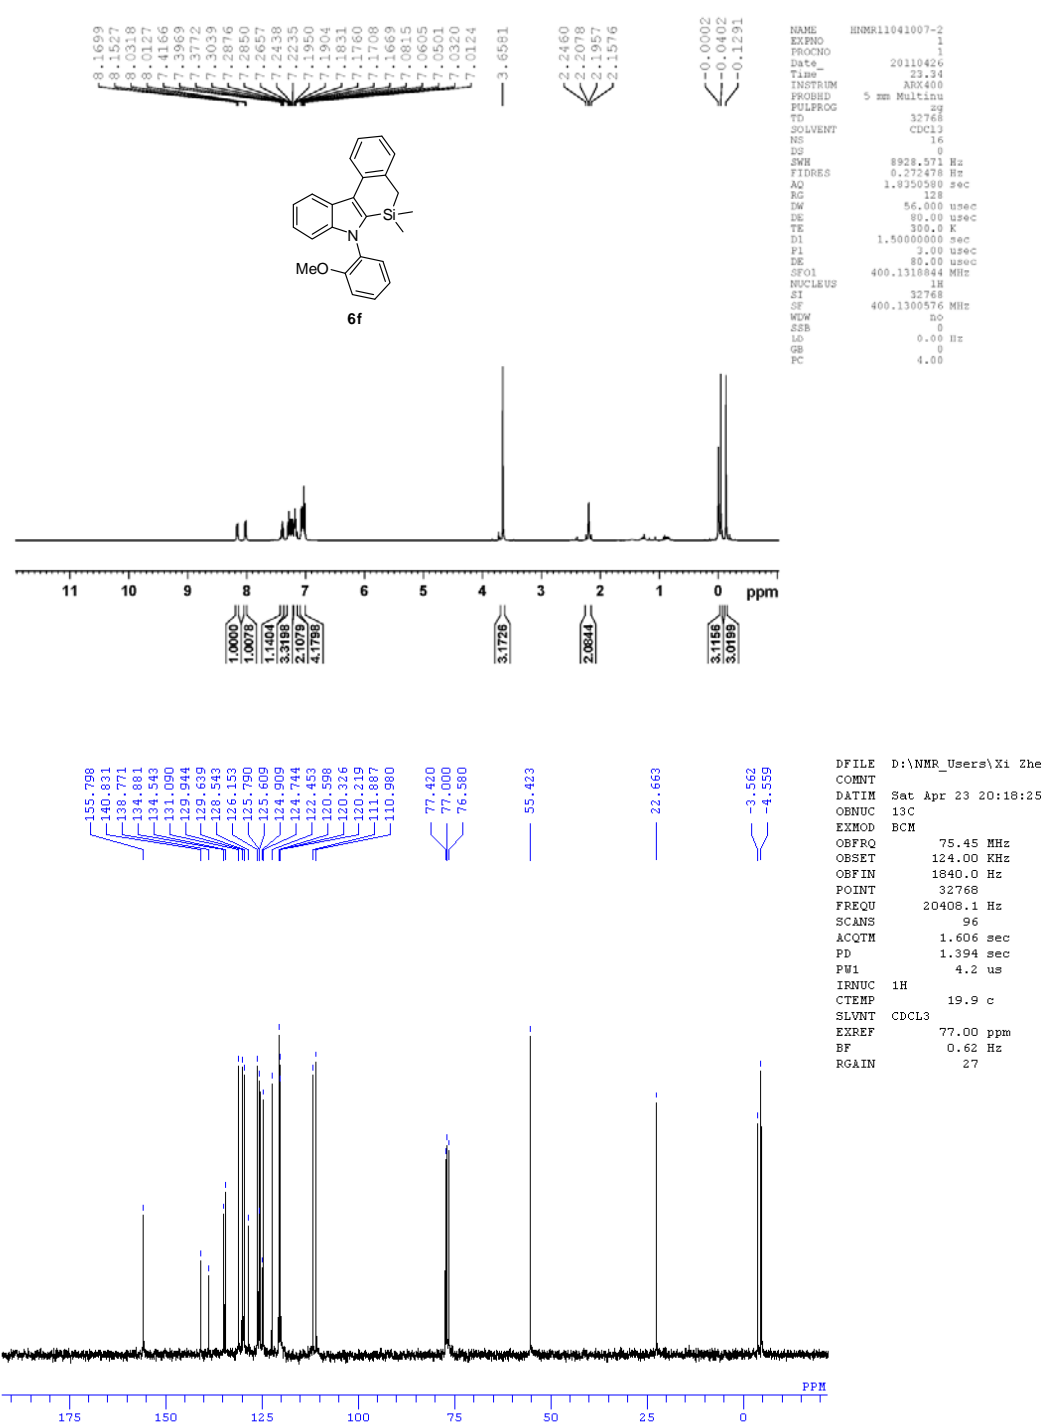

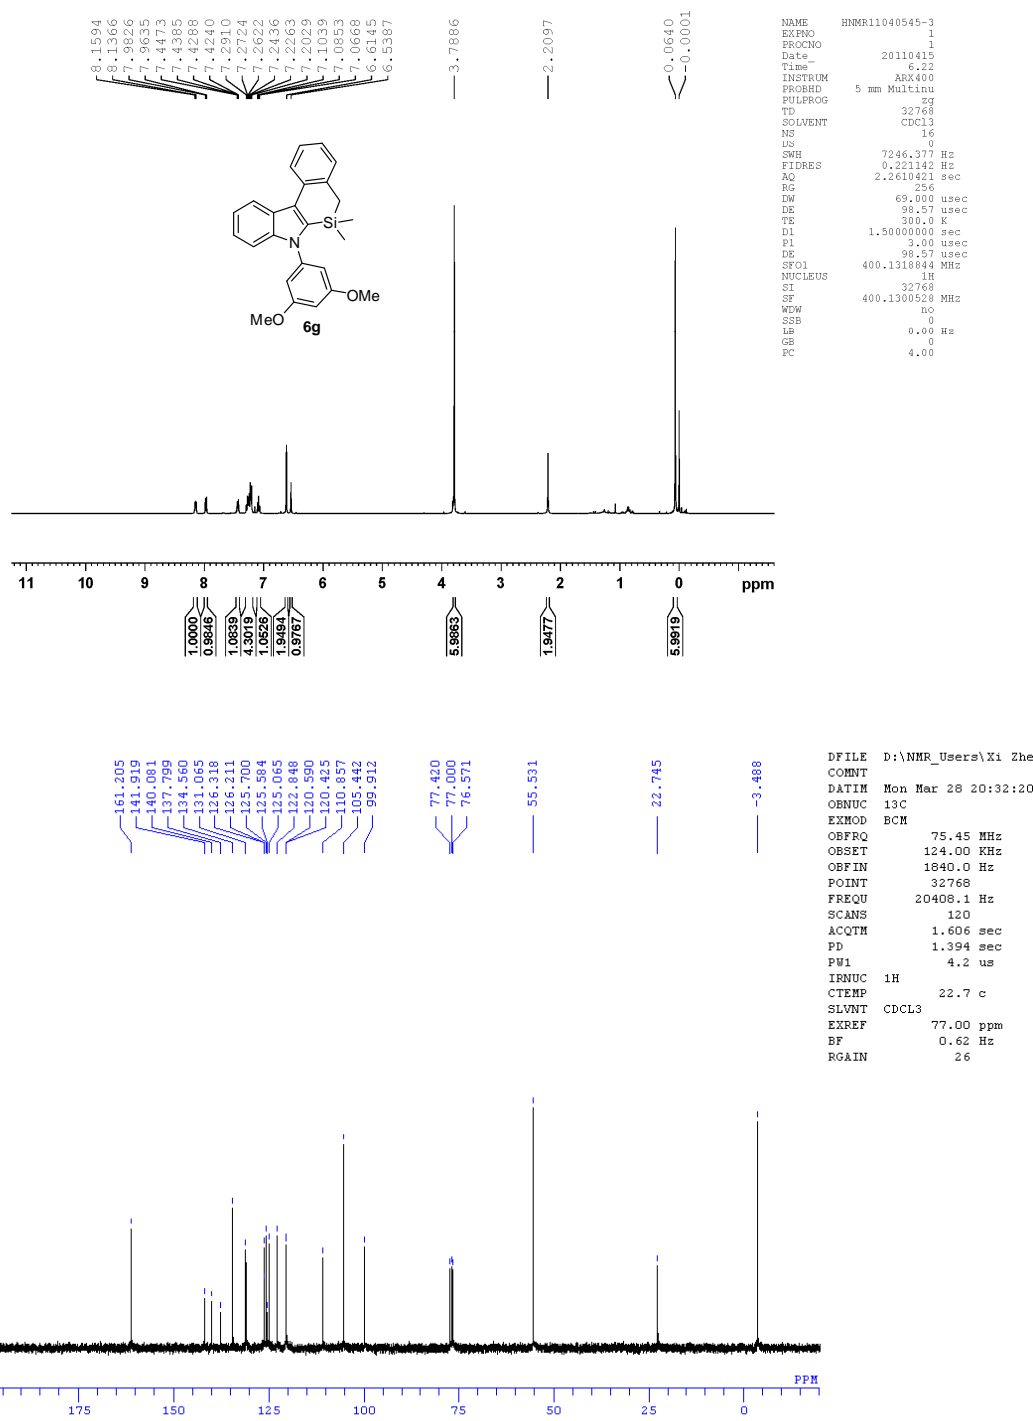

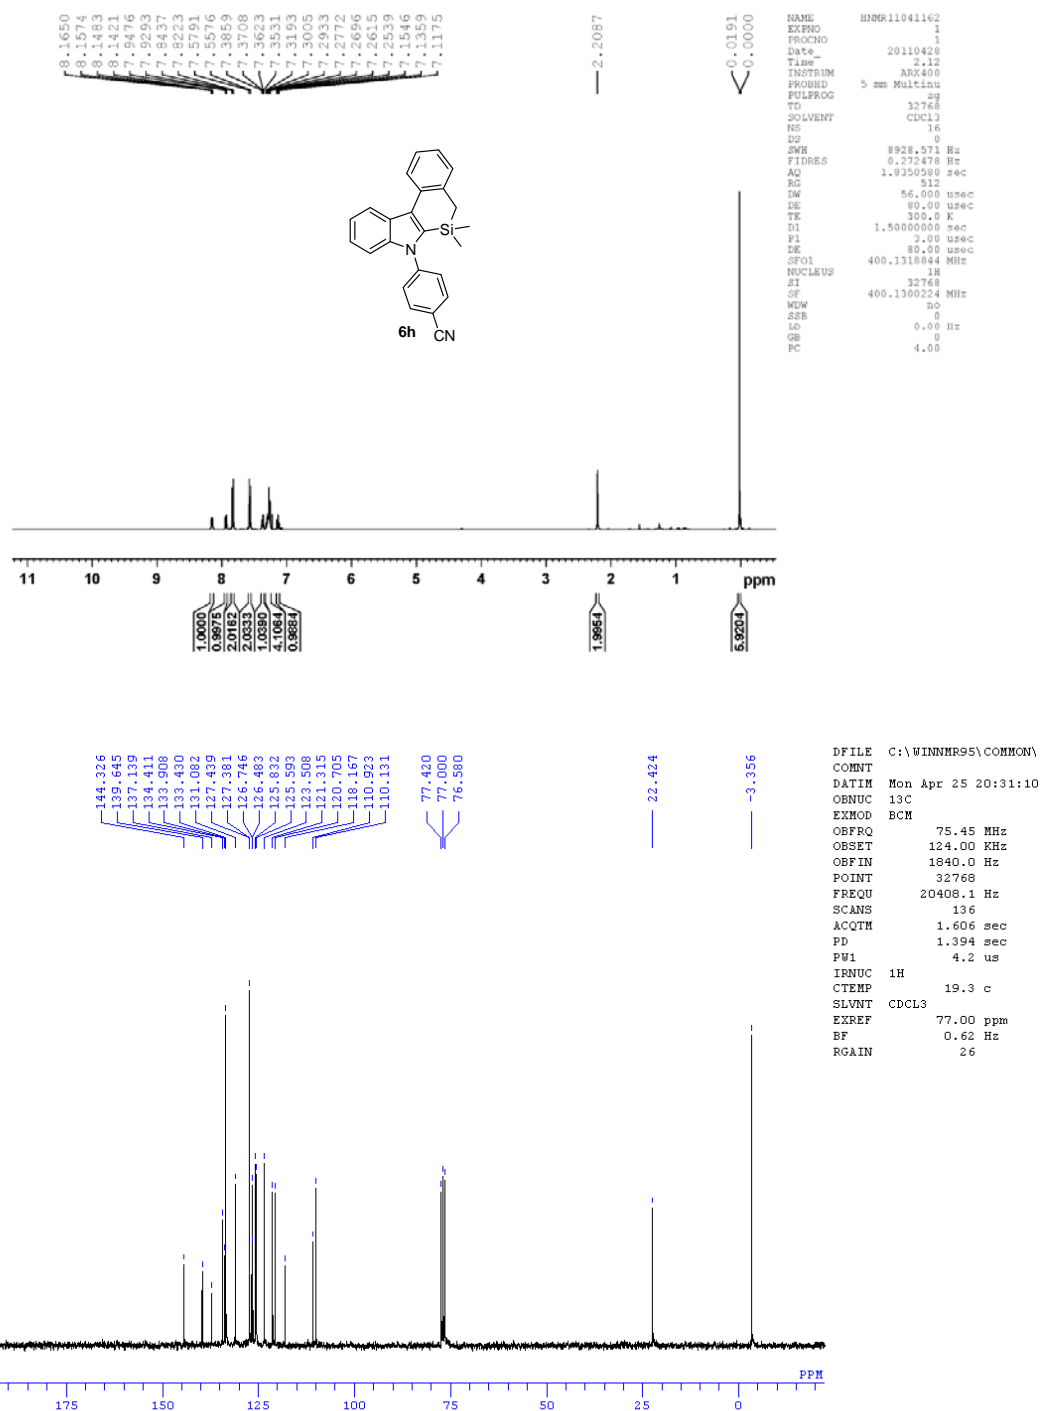

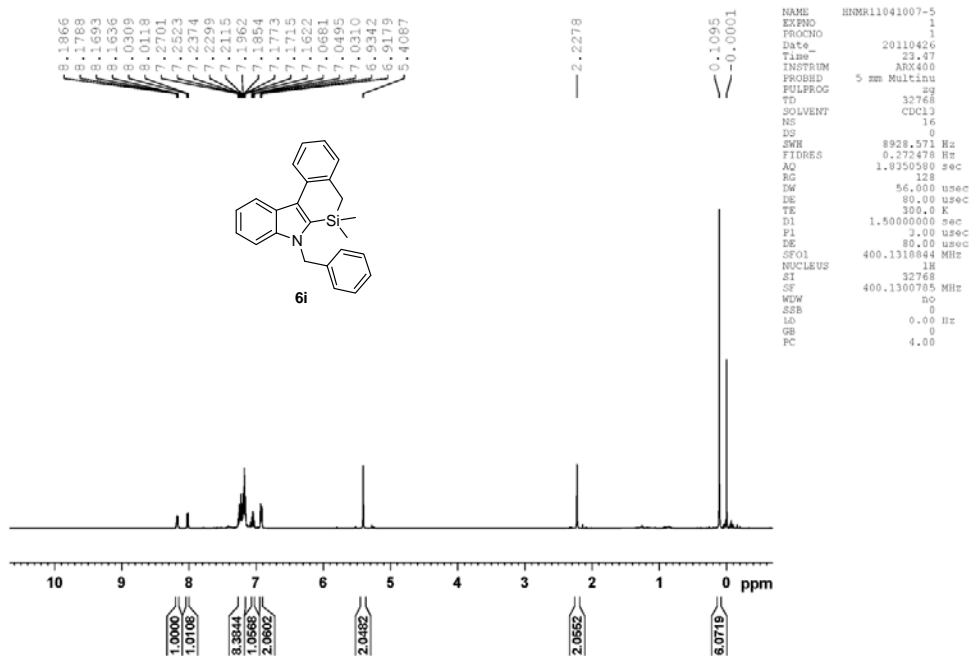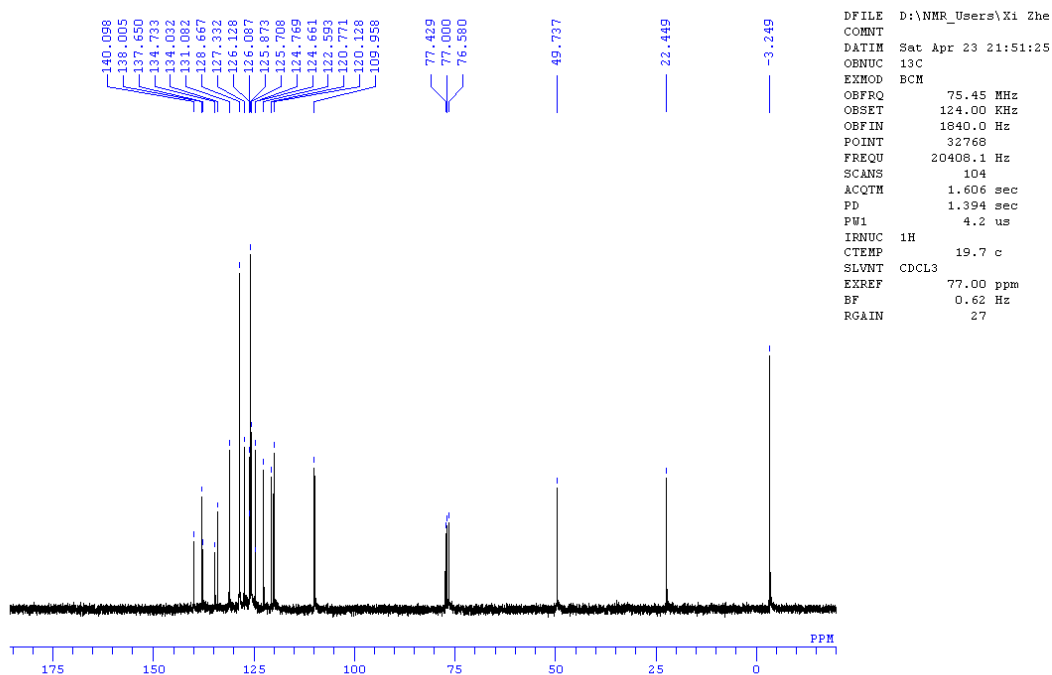

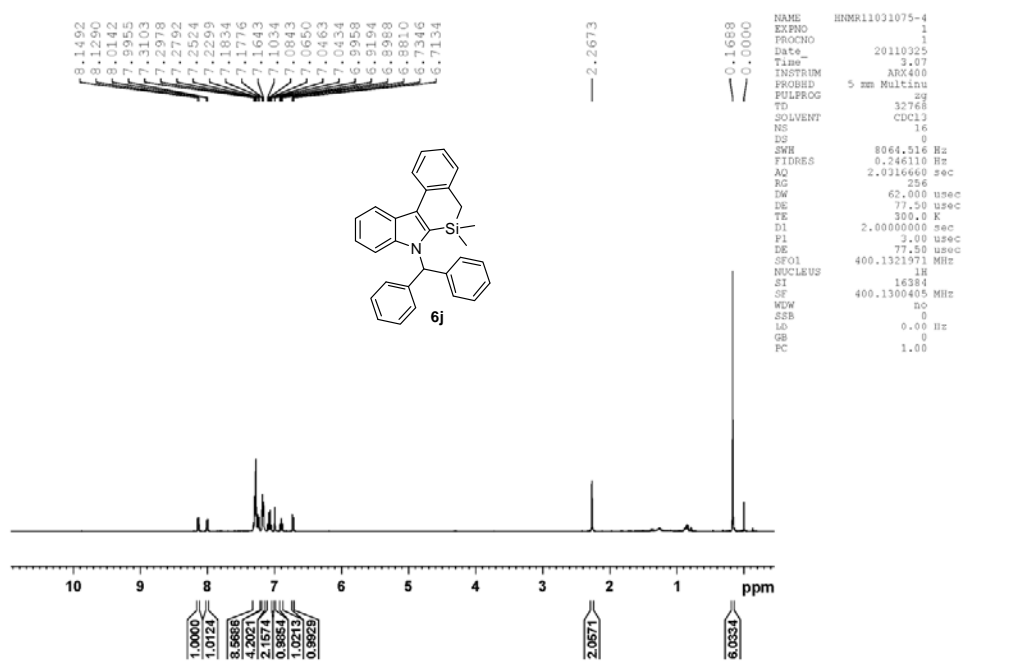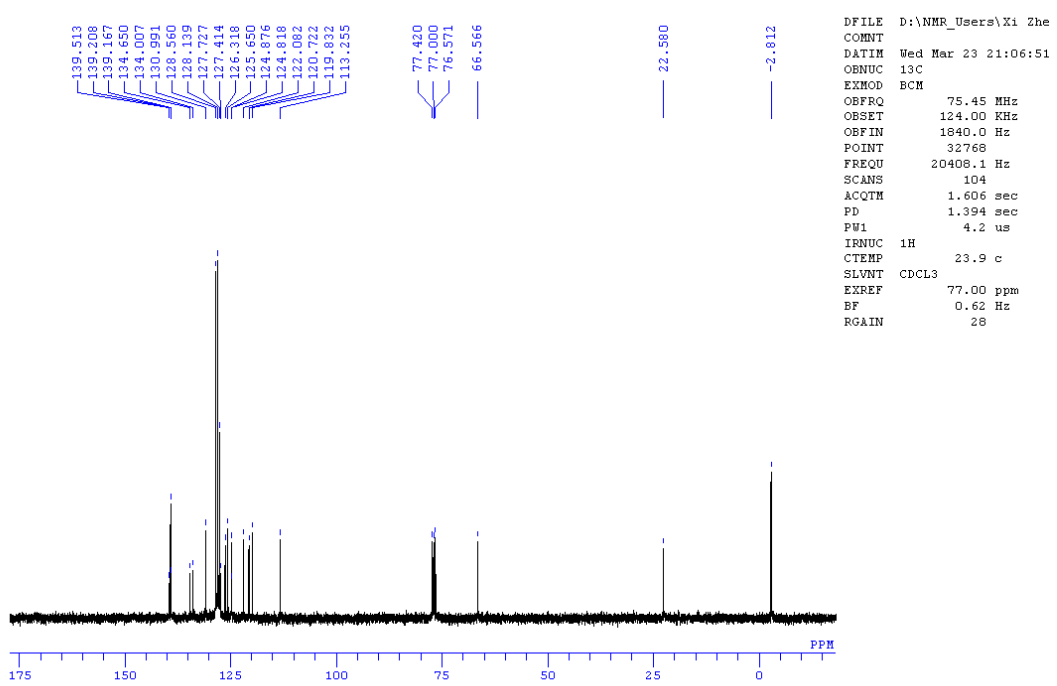



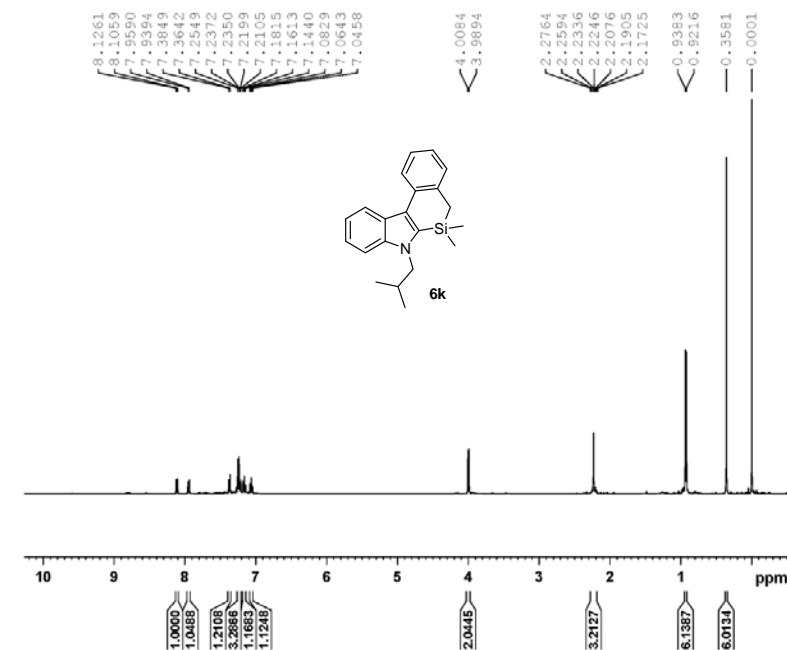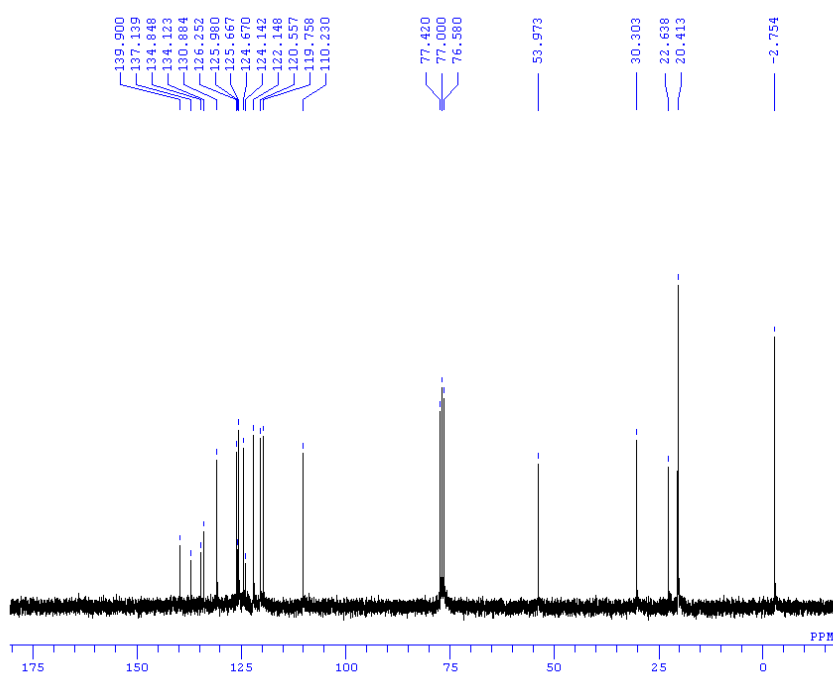



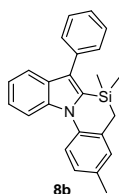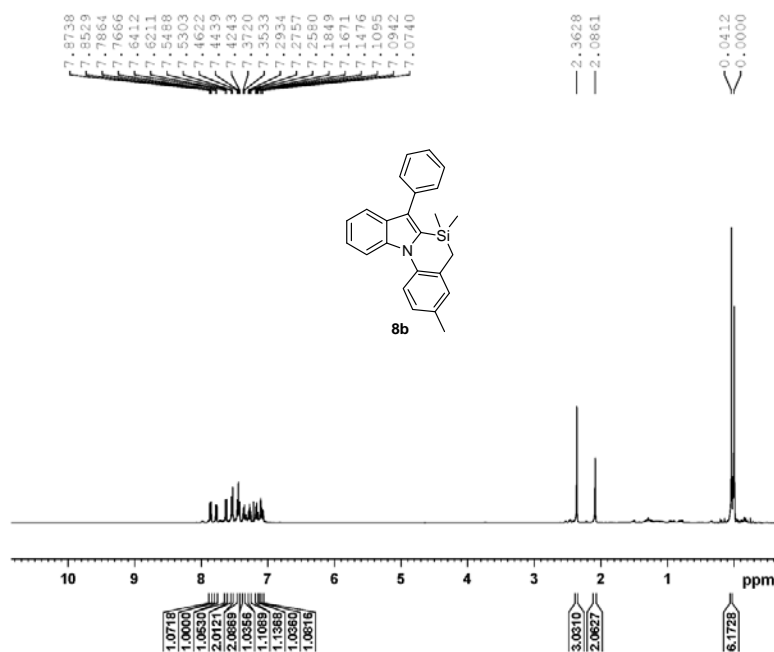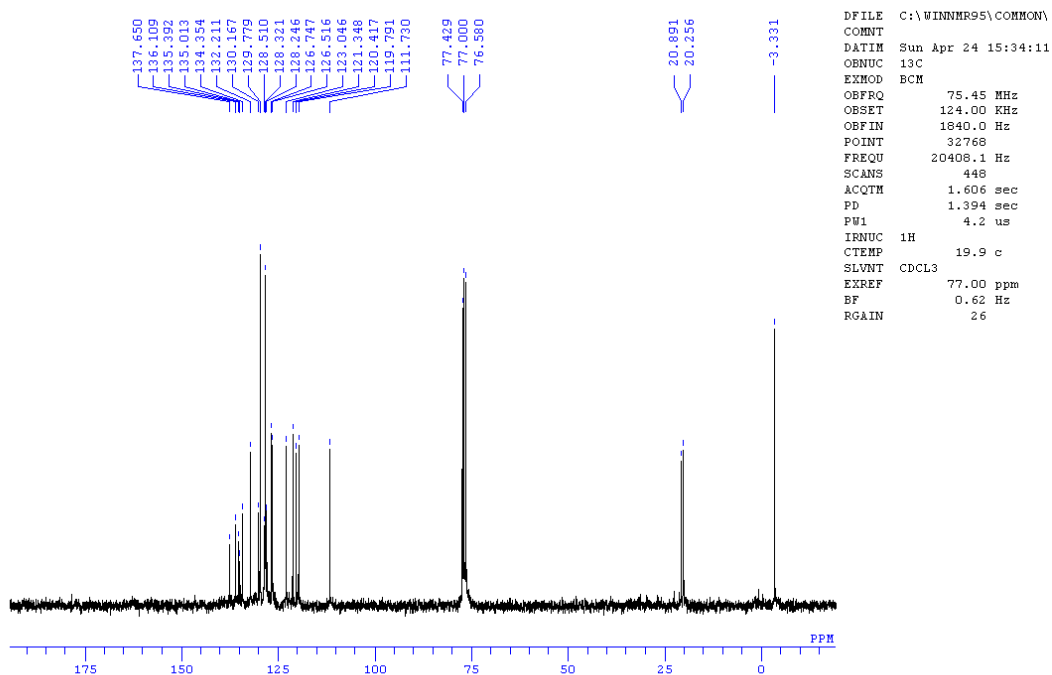

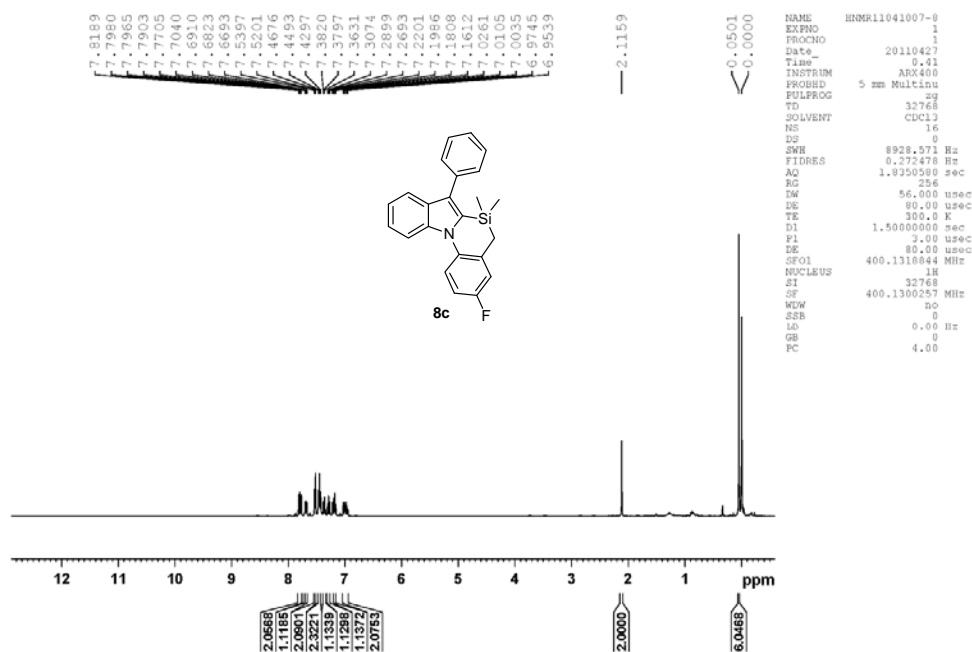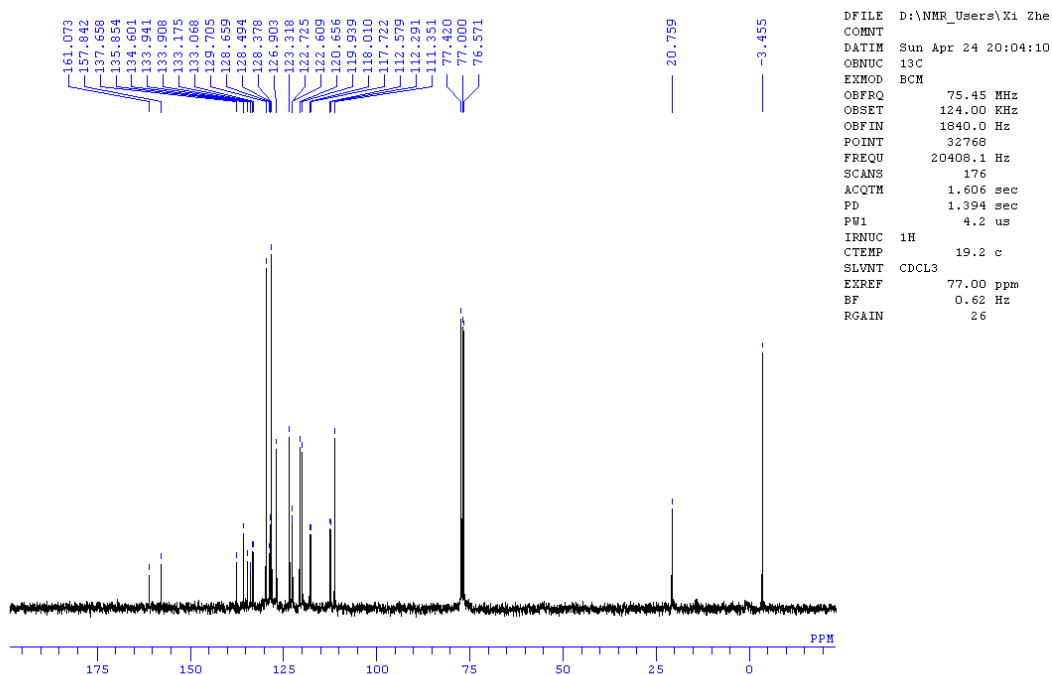

Supplement: c2ob06941e.pdf [file c2ob06941e.pdf]
